# Supplementary material for: Aerodynamic Performance of Propellers for Multirotor Unmanned Aerial Vehicles: Measurement, Analysis, and Experiment
Source: Hindawi journal article supplement (doi:10.1155/2021/9538647), 2021-01-01
Supplement: f1 [file 9538647.f1.zip]

Archive with 2 entries (2 files):
- 9538647.f1/Data of Figures.pdf
- 9538647.f1/File for data processing software(APC 1145).pdf
