# Supplementary material for: Aerodynamic Performance of Propellers for Multirotor Unmanned Aerial Vehicles: Measurement, Analysis, and Experiment
Source: Hindawi journal article supplement (doi:10.1155/2021/9538647), 2021-01-01
Supplement: f1 [file 9538647.f1.zip]

Data of Figure 3 is cited from AirfoilTools.com. Available online: <http://airfoiltools.com/airfoil/details?airfoil=n0012-il>.(Reference 30)

| $Re=50,000$         |         | $Re=100,000$        |         | $Re=200,000$        |         |
|---------------------|---------|---------------------|---------|---------------------|---------|
| $\alpha (^{\circ})$ | $Cl$    | $\alpha (^{\circ})$ | $Cl$    | $\alpha (^{\circ})$ | $Cl$    |
| -10                 | -0.8195 | -12.75              | -0.5002 | -14                 | -0.9628 |
| -9.75               | -0.8355 | -12.5               | -0.5184 | -13.75              | -0.9895 |
| -9.5                | -0.8519 | -12.25              | -0.7724 | -13.5               | -1.0148 |
| -9.25               | -0.8654 | -12                 | -0.7713 | -13.25              | -1.0382 |
| -9                  | -0.8743 | -11.75              | -0.7896 | -13                 | -1.0594 |
| -8.75               | -0.8723 | -11.5               | -0.8377 | -12.75              | -1.0784 |
| -8.5                | -0.8537 | -11.25              | -0.9695 | -12.5               | -1.0955 |
| -8.25               | -0.8499 | -11                 | -0.9842 | -12                 | -1.1063 |
| -8                  | -0.8371 | -10.75              | -0.9915 | -11.75              | -1.0964 |
| -7.75               | -0.8225 | -10.5               | -0.9911 | -11.5               | -1.0857 |
| -7.5                | -0.8044 | -10.25              | -0.9765 | -11.25              | -1.077  |
| -7.25               | -0.7876 | -10                 | -0.9659 | -11                 | -1.0679 |
| -7                  | -0.7691 | -9.75               | -0.9597 | -10.75              | -1.0569 |
| -6.75               | -0.7491 | -9.5                | -0.9523 | -10.5               | -1.0443 |
| -6.5                | -0.7296 | -9.25               | -0.943  | -10.25              | -1.0249 |
| -6.25               | -0.7105 | -9                  | -0.9245 | -10                 | -1.0066 |
| -6                  | -0.6919 | -8.75               | -0.9056 | -9.75               | -0.9881 |
| -5.75               | -0.673  | -8.5                | -0.8883 | -9.5                | -0.9692 |
| -5.5                | -0.6548 | -8.25               | -0.8673 | -9.25               | -0.9491 |
| -5.25               | -0.6369 | -8                  | -0.8471 | -9                  | -0.929  |
| -5                  | -0.6195 | -7.75               | -0.8256 | -8.75               | -0.9087 |
| -4.75               | -0.6002 | -7.5                | -0.805  | -8.5                | -0.889  |
| -4.5                | -0.5816 | -7.25               | -0.7836 | -8.25               | -0.8689 |
| -4.25               | -0.5628 | -7                  | -0.7631 | -8                  | -0.8481 |
| -4                  | -0.5431 | -6.75               | -0.743  | -7.75               | -0.83   |
| -3.75               | -0.5227 | -6.5                | -0.7235 | -7.5                | -0.8096 |
| -3.5                | -0.503  | -6.25               | -0.7047 | -7.25               | -0.7919 |
| -3.25               | -0.4793 | -6                  | -0.6862 | -7                  | -0.7726 |
| -3                  | -0.4493 | -5.75               | -0.6682 | -6.75               | -0.7535 |
| -2.75               | -0.4085 | -5.5                | -0.6504 | -6.5                | -0.7351 |
| -2.5                | -0.35   | -5.25               | -0.6324 | -6.25               | -0.7162 |
| -2.25               | -0.2694 | -5                  | -0.6141 | -6                  | -0.6971 |
| -2                  | -0.1829 | -4.75               | -0.5953 | -5.75               | -0.6785 |
| -1.75               | -0.1037 | -4.5                | -0.5761 | -5.5                | -0.6592 |
| -1.5                | -0.0223 | -4.25               | -0.5565 | -5.25               | -0.6396 |
| -1.25               | 0.0255  | -4                  | -0.5366 | -5                  | -0.6195 |
| -1                  | 0.0285  | -3.75               | -0.5162 | -4.75               | -0.599  |
| -0.75               | 0.0275  | -3.5                | -0.4957 | -4.5                | -0.5783 |
| -0.5                | 0.0225  | -3.25               | -0.4751 | -4.25               | -0.5572 |
| -0.25               | 0.0128  | -3                  | -0.4545 | -4                  | -0.5358 |
| 0                   | 0       | -2.75               | -0.434  | -3.75               | -0.5139 |
| 0.25                | -0.0128 | -2.5                | -0.4137 | -3.5                | -0.4915 |
| 0.5                 | -0.0225 | -2.25               | -0.3935 | -3.25               | -0.4689 |
| 0.75                | -0.0275 | -2                  | -0.3737 | -3                  | -0.4463 |
| 1                   | -0.0285 | -1.75               | -0.3539 | -2.75               | -0.4236 |
| 1.25                | -0.0255 | -1.5                | -0.332  | -2.5                | -0.3942 |
| 1.5                 | 0.0223  | -1.25               | -0.3021 | -2.25               | -0.3513 |
| 1.75                | 0.1036  | -1                  | -0.2578 | -2                  | -0.3085 |
| 2                   | 0.1829  | -0.75               | -0.2041 | -1.75               | -0.2684 |
| 2.25                | 0.2694  | -0.5                | -0.1345 | -1.5                | -0.2255 |
| 2.5                 | 0.3499  | -0.25               | -0.0651 | -1.25               | -0.1861 |
| 2.75                | 0.4085  | 0                   | 0       | -1                  | -0.1454 |
| 3                   | 0.4492  | 0.25                | 0.0651  | -0.75               | -0.1048 |

|       |        |       |        |       |        |
|-------|--------|-------|--------|-------|--------|
| 3.25  | 0.4792 | 0.5   | 0.1344 | -0.5  | -0.07  |
| 3.5   | 0.503  | 0.75  | 0.204  | -0.25 | -0.035 |
| 3.75  | 0.5227 | 1     | 0.2578 | 0     | 0      |
| 4     | 0.5431 | 1.25  | 0.302  | 0.25  | 0.035  |
| 4.25  | 0.5627 | 1.5   | 0.332  | 0.5   | 0.07   |
| 4.5   | 0.5816 | 1.75  | 0.3538 | 0.75  | 0.1048 |
| 4.75  | 0.6001 | 2     | 0.3737 | 1     | 0.1454 |
| 5     | 0.6194 | 2.25  | 0.3934 | 1.25  | 0.1861 |
| 5.25  | 0.6368 | 2.5   | 0.4136 | 1.5   | 0.2255 |
| 5.5   | 0.6547 | 2.75  | 0.4339 | 1.75  | 0.2684 |
| 5.75  | 0.673  | 3     | 0.4544 | 2     | 0.3085 |
| 6     | 0.6919 | 3.25  | 0.475  | 2.25  | 0.3513 |
| 6.25  | 0.7105 | 3.5   | 0.4957 | 2.5   | 0.3942 |
| 6.5   | 0.7295 | 3.75  | 0.5162 | 2.75  | 0.4235 |
| 6.75  | 0.7491 | 4     | 0.5365 | 3     | 0.4462 |
| 7     | 0.7691 | 4.25  | 0.5565 | 3.25  | 0.4689 |
| 7.25  | 0.7876 | 4.5   | 0.5761 | 3.5   | 0.4915 |
| 7.5   | 0.8044 | 4.75  | 0.5953 | 3.75  | 0.5138 |
| 7.75  | 0.8226 | 5     | 0.6141 | 4     | 0.5357 |
| 8     | 0.8372 | 5.25  | 0.6323 | 4.25  | 0.5571 |
| 8.25  | 0.8499 | 5.5   | 0.6503 | 4.5   | 0.5782 |
| 8.5   | 0.8538 | 5.75  | 0.6681 | 4.75  | 0.599  |
| 8.75  | 0.8727 | 6     | 0.6862 | 5     | 0.6195 |
| 9     | 0.8743 | 6.25  | 0.7046 | 5.25  | 0.6395 |
| 9.25  | 0.8655 | 6.5   | 0.7235 | 5.5   | 0.6591 |
| 9.5   | 0.852  | 6.75  | 0.743  | 5.75  | 0.6784 |
| 9.75  | 0.8357 | 7     | 0.7631 | 6     | 0.6971 |
| 10    | 0.8198 | 7.25  | 0.7836 | 6.25  | 0.7161 |
| 10.25 | 0.6499 | 7.5   | 0.805  | 6.5   | 0.7351 |
| 10.5  | 0.6743 | 7.75  | 0.8256 | 6.75  | 0.7535 |
|       |        | 8     | 0.8471 | 7     | 0.7725 |
|       |        | 8.25  | 0.8673 | 7.25  | 0.7919 |
|       |        | 8.5   | 0.8884 | 7.5   | 0.8096 |
|       |        | 8.75  | 0.9057 | 7.75  | 0.83   |
|       |        | 9     | 0.9246 | 8     | 0.8481 |
|       |        | 9.25  | 0.9431 | 8.25  | 0.869  |
|       |        | 9.5   | 0.9524 | 8.5   | 0.889  |
|       |        | 9.75  | 0.9598 | 8.75  | 0.9087 |
|       |        | 10    | 0.9661 | 9     | 0.9291 |
|       |        | 10.25 | 0.9768 | 9.25  | 0.9492 |
|       |        | 10.5  | 0.9913 | 9.5   | 0.9693 |
|       |        | 10.75 | 0.9917 | 9.75  | 0.9882 |
|       |        | 11    | 0.9845 | 10    | 1.0067 |
|       |        | 11.25 | 0.9697 | 10.25 | 1.0251 |
|       |        | 11.5  | 0.8378 | 10.5  | 1.0445 |
|       |        | 11.75 | 0.7898 | 10.75 | 1.0571 |
|       |        |       |        | 11    | 1.0681 |
|       |        |       |        | 11.25 | 1.0773 |
|       |        |       |        | 11.5  | 1.086  |
|       |        |       |        | 11.75 | 1.0969 |
|       |        |       |        | 12    | 1.1068 |
|       |        |       |        | 12.25 | 1.1101 |
|       |        |       |        | 12.5  | 1.0959 |
|       |        |       |        | 12.75 | 1.079  |
|       |        |       |        | 13    | 1.0599 |
|       |        |       |        | 13.25 | 1.0385 |

|  |  |  |  |       |        |
|--|--|--|--|-------|--------|
|  |  |  |  | 13.5  | 1.015  |
|  |  |  |  | 13.75 | 0.9898 |
|  |  |  |  | 14    | 0.9632 |

Data of Figure 10a

| Experiment 1 |           | Experiment 2 |           | Experiment 3 |           | Experiment 4 |           | Experiment 5 |           |
|--------------|-----------|--------------|-----------|--------------|-----------|--------------|-----------|--------------|-----------|
| Speed(r/min) | Thrust(N) |
| 1350.648     | -0.12056  | 1697.19      | -0.62494  | 1142.862     | -0.50893  | 1220.28      | -0.55667  | 1607.148     | -0.45287  |
| 1708.158     | -0.09752  | 1926.66      | -0.622    | 2110.17      | -0.45746  | 1794.186     | -0.4895   | 1912.266     | -0.38571  |
| 2085.69      | -0.09311  | 2221.326     | -0.59749  | 2338.776     | -0.26381  | 2367.87      | -0.24046  | 2268.276     | -0.31953  |
| 2267.352     | -0.09164  | 2420.676     | -0.58964  | 2727.186     | -0.18832  | 2736.714     | -0.16742  | 2468.466     | -0.15138  |
| 2412.192     | -0.09213  | 2568.87      | -0.55827  | 2894.37      | -0.11674  | 2927.67      | -0.08359  | 2604.618     | -0.07637  |
| 2533.632     | -0.05291  | 2659.374     | -0.5264   | 3021.762     | -0.09566  | 3021.378     | -0.06103  | 2707.332     | -0.02391  |
| 2649.174     | -0.06223  | 2746.41      | -0.51169  | 3095.976     | -0.02507  | 3058.014     | -0.01838  | 2818.44      | 0.01776   |
| 2715.906     | -0.05242  | 2786.94      | -0.46953  | 3147.642     | 0.03621   | 3108.444     | 0.02231   | 2919.921     | 0.04423   |
| 2765.64      | -0.0485   | 2828.634     | -0.45385  | 3200.88      | 0.04896   | 3134.166     | 0.03603   | 3021.402     | 0.05502   |
| 2796.432     | -0.05046  | 2850.078     | -0.45041  | 3228.318     | 0.072     | 3147.228     | 0.06103   | 3070.482     | 0.10747   |
| 2827.812     | -0.0436   | 2871.804     | -0.39551  | 3284.544     | 0.10289   | 3173.664     | 0.07476   | 3160.392     | 0.13689   |
| 2838.516     | -0.03722  | 2882.64      | -0.40041  | 3387.57      | 0.15681   | 3214.14      | 0.07917   | 3228.006     | 0.15699   |
| 2881.764     | -0.02987  | 2916.432     | -0.36315  | 3426.42      | 0.17691   | 3214.128     | 0.07868   | 3255.732     | 0.1462    |
| 2892.858     | -0.04703  | 2950.224     | -0.35923  | 3465.27      | 0.21956   | 3200.598     | 0.09241   | 3284.07      | 0.17561   |
| 2892.87      | -0.03232  | 3008.922     | -0.3656   | 3497.448     | 0.28084   | 3200.562     | 0.09927   | 3342.138     | 0.24425   |
| 2926.482     | -0.03085  | 3033.174     | -0.36315  | 3513.666     | 0.3083    | 3241.734     | 0.08702   | 3417.798     | 0.29229   |
| 2915.256     | -0.01761  | 3057.78      | -0.3509   | 3513.684     | 0.33281   | 3255.708     | 0.08996   | 3464.922     | 0.33985   |
| 2926.518     | -0.01516  | 3095.292     | -0.32638  | 3546.6       | 0.36958   | 3255.726     | 0.09241   | 3480.792     | 0.39377   |
| 2915.238     | -0.02055  | 3160.092     | -0.31462  | 3649.41      | 0.41566   | 3269.784     | 0.09437   | 3513.144     | 0.44083   |
| 2903.964     | -0.00536  | 3200.316     | -0.31903  | 3667.116     | 0.47792   | 3284.064     | 0.12084   | 3546.24      | 0.49819   |
| 2909.58      | -0.01222  | 3227.676     | -0.3004   | 3703.062     | 0.46468   | 3298.404     | 0.12673   | 3579.804     | 0.54329   |
| 2915.196     | -0.00487  | 3241.386     | -0.30628  | 3721.308     | 0.49557   | 3342.234     | 0.1532    | 3631.458     | 0.57075   |
| 2960.952     | 0.0118    | 3298.08      | -0.27785  | 3796.164     | 0.55538   | 3387.18      | 0.21301   | 3649.002     | 0.59771   |
| 2960.964     | -0.00683  | 3312.57      | -0.27099  | 3934.422     | 0.68137   | 3448.998     | 0.26448   | 3684.696     | 0.59624   |
| 2996.148     | 0.01866   | 3372.804     | -0.21706  | 4061.346     | 0.88727   | 3480.792     | 0.33361   | 3720.972     | 0.61634   |
| 3032.316     | 0.00641   | 3433.038     | -0.19108  | 4243.926     | 1.13239   | 3513.162     | 0.3694    | 3757.974     | 0.66487   |
| 3076.152     | 0.00102   | 3464.574     | -0.1298   | 4366.59      | 1.31378   | 3513.114     | 0.40469   | 3853.812     | 0.76832   |
| 3119.988     | 0.05102   | 3512.898     | -0.11411  | 4443.768     | 1.34172   | 3529.656     | 0.40469   | 4017.72      | 0.99971   |
| 3185.838     | 0.08436   | 3545.838     | -0.07097  | 4550.778     | 1.39712   | 3529.536     | 0.43509   | 4219.752     | 1.24973   |
| 3212.916     | 0.08926   | 3545.922     | -0.05185  | 4578.264     | 1.53831   | 3596.772     | 0.43019   | 4316.166     | 1.36494   |
| 3240.564     | 0.07651   | 3579.456     | 0.00257   | 4606.29      | 1.69813   | 3613.95      | 0.47284   | 4391.604     | 1.52083   |
| 3240.504     | 0.09269   | 3613.716     | 0.01629   | 4678.701     | 1.82559   | 3631.326     | 0.47627   | 4469.562     | 1.53799   |
| 3254.49      | 0.09318   | 3684.252     | 0.01727   | 4751.112     | 1.89962   | 3648.918     | 0.49931   | 4551.762     | 1.67232   |
| 3268.578     | 0.09465   | 3702.282     | 0.0212    | 4842.546     | 1.95991   | 3684.456     | 0.48705   | 4633.962     | 1.87037   |

|          |         |          |         |          |         |          |         |          |         |
|----------|---------|----------|---------|----------|---------|----------|---------|----------|---------|
| 3297.234 | 0.08828 | 3720.624 | 0.03002 | 4873.632 | 1.95158 | 3721.125 | 0.49833 | 4691.478 | 1.97627 |
| 3355.776 | 0.09367 | 3739.008 | 0.03933 | 4905.39  | 2.00257 | 3757.794 | 0.54392 | 4750.446 | 2.01696 |
| 3416.58  | 0.09122 | 3795.408 | 0.0712  | 4905.228 | 2.04816 | 3933.978 | 0.68609 | 4750.518 | 2.02725 |
| 3495.66  | 0.12112 | 3885.225 | 0.16533 | 4937.394 | 2.08787 | 3996.438 | 0.84934 | 4750.422 | 2.04882 |
| 3561.606 | 0.1623  | 3975.042 | 0.31583 | 4937.412 | 2.10503 | 4150.194 | 1.20673 | 4780.71  | 2.14001 |
| 3595.59  | 0.19417 | 4038.774 | 0.46486 | 4970.04  | 2.19033 | 4340.97  | 1.43763 | 4810.956 | 2.14393 |
| 3630.144 | 0.2079  | 4104.732 | 0.53987 | 5036.202 | 2.28936 | 4417.212 | 1.54597 | 4841.772 | 2.1704  |
| 3665.34  | 0.23045 | 4127.1   | 0.61635 | 5035.98  | 2.3727  | 4443.018 | 1.60725 | 4904.976 | 2.2008  |
| 3701.412 | 0.23976 | 4242.984 | 0.86049 | 5069.742 | 2.49526 | 4442.958 | 1.62    | 4904.664 | 2.15864 |
| 3756.576 | 0.2579  | 4391.034 | 1.00511 | 5138.862 | 2.59821 | 4443.06  | 1.64255 | 4937.1   | 2.20178 |
| 3832.926 | 0.30791 | 4522.758 | 1.06933 | 5174.142 | 2.66733 | 4495.95  | 1.63078 | 4936.896 | 2.28757 |
| 3892.062 | 0.45106 | 4662.246 | 1.29533 | 5209.908 | 2.71685 | 4550.202 | 1.6955  | 4936.896 | 2.36258 |
| 3995.166 | 0.61284 | 4720.53  | 1.41054 | 5246.232 | 2.90069 | 4605.516 | 1.82296 | 4969.284 | 2.41601 |
| 4081.494 | 0.8609  | 4780.206 | 1.43358 | 5282.49  | 3.41446 | 4633.854 | 1.91463 | 5002.374 | 2.44788 |
| 4241.946 | 1.14916 | 4810.686 | 1.45515 | 5396.112 | 3.92136 | 4662.666 | 1.96611 | 5002.17  | 2.48514 |
| 4339.518 | 1.2928  | 4872.906 | 1.48799 | 5554.494 | 4.29591 | 4691.478 | 2.01758 | 5002.392 | 2.4871  |
| 4441.758 | 1.43105 | 4872.708 | 1.49927 | 5637.552 | 4.6028  | 4691.442 | 2.06563 | 5002.242 | 2.50916 |
| 4494.534 | 1.46585 | 4904.382 | 1.50515 | 5680.02  | 4.47583 | 4691.442 | 2.04209 | 5002.182 | 2.58809 |
| 4521.24  | 1.4634  | 4904.364 | 1.55663 | 5679.762 | 4.92636 | 4691.322 | 2.0416  | 5069.346 | 2.68172 |
| 4548.546 | 1.4938  | 4936.548 | 1.60516 | 5810.868 | 5.32247 | 4691.496 | 2.05533 | 5138.586 | 2.91851 |
| 4604.208 | 1.54037 | 4904.202 | 1.65517 | 5947.8   | 5.64211 | 4691.304 | 2.097   | 5173.566 | 3.01607 |
| 4632.438 | 1.62763 | 4936.482 | 1.69929 | 6043.65  | 5.77202 | 4780.518 | 2.14063 | 5173.5   | 3.15333 |
| 4660.962 | 1.69921 | 4936.47  | 1.73704 | 6092.412 | 5.77937 | 4810.908 | 2.18966 | 5209.29  | 3.25187 |
| 4689.984 | 1.74921 | 4968.87  | 1.80714 | 6092.424 | 5.748   | 4841.766 | 2.20878 | 5209.362 | 3.27687 |
| 4719.294 | 1.7747  | 4968.936 | 1.81253 | 6092.346 | 5.75094 | 4904.832 | 2.23868 | 5245.554 | 3.75339 |
| 4719.366 | 1.74872 | 5001.624 | 1.86107 | 6092.262 | 5.77447 | 4904.688 | 2.30143 | 5395.236 | 4.15195 |
| 4719.234 | 1.76343 | 5035.224 | 1.93509 | 6092.508 | 5.81516 | 4904.76  | 2.28329 | 5473.284 | 4.37354 |
| 4809.45  | 1.73745 | 5069.1   | 1.98265 | 6092.37  | 5.83379 | 4904.526 | 2.34261 | 5513.46  | 4.50492 |
| 4840.35  | 1.78157 | 5103.114 | 2.12187 | 6043.038 | 5.88282 | 4936.746 | 2.44997 | 5513.244 | 4.57454 |
| 4871.568 | 1.835   | 5173.218 | 2.20374 | 6043.062 | 5.85438 | 4969.008 | 2.53773 | 5637.234 | 4.8726  |
| 4935.15  | 1.95609 | 5173.164 | 2.22973 | 6043.002 | 5.84065 | 4968.936 | 2.5745  | 5810.742 | 5.531   |
| 5034.066 | 2.00904 | 5173.11  | 2.27287 | 6043.182 | 5.78869 | 5035.398 | 2.6093  | 5901.06  | 5.83151 |
| 5000.55  | 2.01884 | 5245.068 | 2.34837 | 6092.358 | 5.75339 | 5035.296 | 2.67843 | 5947.506 | 5.90652 |
| 5034.072 | 2.03992 | 5281.848 | 2.65771 | 6092.136 | 5.82938 | 5103.57  | 2.76961 | 5995.122 | 5.97221 |
| 5101.986 | 2.13111 | 5356.56  | 3.18864 | 6091.728 | 5.97988 | 5138.298 | 2.97992 | 5994.846 | 5.99967 |
| 5171.94  | 2.27034 | 5433.492 | 3.3112  | 6141.474 | 6.12695 | 5245.212 | 3.79323 | 5994.654 | 6.02369 |
| 5207.382 | 2.42819 | 5433.72  | 3.35238 | 6141.372 | 6.01812 | 5395.17  | 4.3021  | 6043.05  | 6.05212 |

|          |         |          |         |          |         |          |         |          |         |
|----------|---------|----------|---------|----------|---------|----------|---------|----------|---------|
| 5317.662 | 2.68949 | 5433.642 | 3.36463 | 6141.234 | 5.94802 | 5433.798 | 4.51732 | 6042.99  | 6.10703 |
| 5432.28  | 2.95226 | 5473.116 | 3.39993 | 6192.042 | 6.21324 | 5513.346 | 4.61634 | 6042.93  | 6.10556 |
| 5471.526 | 3.37338 | 5513.076 | 3.67103 | 6191.82  | 6.31766 | 5513.154 | 4.69233 | 6042.648 | 6.14576 |
| 5552.286 | 3.83763 | 5553.222 | 4.01175 | 6294.888 | 6.3505  | 5512.812 | 5.17179 | 6091.74  | 6.16733 |
| 5593.194 | 4.02834 | 5721.666 | 4.26422 | 6347.946 | 6.50934 | 5721.786 | 5.85861 | 6042.42  | 6.15507 |
| 5593.572 | 4.09403 | 5809.428 | 4.35688 | 6347.502 | 6.76525 | 5947.152 | 6.34395 | 6042.684 | 6.19282 |
| 5634.996 | 4.60045 | 5854.572 | 4.5417  | 6402.156 | 6.1549  | 6042.696 | 6.46896 | 6042.342 | 6.24037 |
| 5764.008 | 4.82008 | 5900.526 | 4.70789 | 6347.382 | 6.59268 | 6042.354 | 6.54936 | 6042.294 | 6.28695 |
| 5853.522 | 5.1049  | 5947.092 | 4.82212 | 6347.166 | 6.65151 | 6042.342 | 6.56848 | 6091.566 | 6.42617 |
| 5945.88  | 5.43435 | 5946.516 | 4.88487 | 6401.472 | 6.15049 | 6091.494 | 6.56897 | 6191.454 | 6.5252  |
| 5992.488 | 5.60789 | 6042.456 | 4.94958 | 6400.986 | 6.48336 | 6042.03  | 6.54789 | 6294.558 | 6.91887 |
| 6040.884 | 5.68339 | 6042.516 | 4.95301 | 6456.402 | 6.59955 | 6042.09  | 6.50769 | 6293.982 | 6.72228 |
| 6040.788 | 5.70643 | 6042.078 | 5.02459 | 6512.934 | 6.40835 | 6042.018 | 6.50818 | 6347.622 | 7.26596 |
| 6089.85  | 5.72849 | 6091.134 | 5.09371 | 6511.362 | 6.58925 | 6091.296 | 6.50818 | 6347.232 | 6.81543 |
| 6040.518 | 5.69809 | 6091.11  | 5.16675 | 6745.938 | 6.82457 | 6042.198 | 6.52975 | 6347.484 | 7.3189  |
| 6040.518 | 5.68976 | 6091.146 | 5.17362 | 6744.486 | 6.47552 | 6091.332 | 6.57387 | 6347.298 | 6.90612 |
| 6089.922 | 5.67407 | 6090.606 | 5.21186 | 6806.118 | 6.83682 | 6091.026 | 6.62878 | 6346.626 | 6.97622 |
| 6089.892 | 5.64956 | 6140.292 | 5.2148  | 6805.944 | 7.4305  | 6090.96  | 6.80085 | 6400.602 | 7.2037  |
| 6089.862 | 5.68584 | 6242.16  | 5.61091 | 6805.206 | 6.97017 | 6191.424 | 6.78762 | 6511.32  | 6.98946 |
| 6089.838 | 5.70839 | 6241.692 | 5.53394 | 6867.048 | 7.63542 | 6190.674 | 6.87145 | 6626.16  | 7.08457 |
| 6089.502 | 5.83732 | 6347.256 | 5.79622 | 6930.888 | 7.60503 | 6216.318 | 7.19207 | 6624.372 | 7.00711 |
| 6089.208 | 5.83536 | 6346.182 | 5.50796 | 6929.892 | 8.04772 | 6241.962 | 6.88125 | 6744.786 | 6.79484 |
| 6139.566 | 5.89027 | 6400.572 | 5.89182 | 6930.036 | 7.65356 | 6241.626 | 7.28815 | 6744.408 | 6.83356 |
| 6138.984 | 5.91135 | 6400.314 | 5.70161 | 6995.418 | 8.42765 | 6347.31  | 7.04205 | 6683.556 | 7.17477 |
| 6241.278 | 6.20893 | 6456.138 | 5.40207 | 6994.44  | 8.07027 | 6400.698 | 7.57053 | 6683.85  | 7.34636 |
| 6240.822 | 6.30501 | 6455.364 | 5.60356 | 6994.542 | 7.98349 | 6455.61  | 7.20432 | 6684     | 7.28409 |
| 6240.222 | 6.17853 | 6567.87  | 5.72808 | 6994.212 | 8.49138 | 6455.4   | 7.00087 | 6683.184 | 7.12967 |
| 6240.156 | 6.42806 | 6567.324 | 5.76877 | 6994.116 | 8.09968 | 6511.548 | 7.02882 | 6742.86  | 7.07819 |
| 6292.752 | 6.17853 | 6684.27  | 5.8428  | 6994.26  | 8.00457 | 6567.354 | 7.22932 | 6865.914 | 8.5293  |
| 6292.446 | 6.48346 | 6743.784 | 6.46344 | 7060.602 | 8.66493 | 6625.47  | 7.36316 | 6928.902 | 8.21751 |
| 6239.886 | 6.23197 | 6867.096 | 6.90956 | 7058.826 | 8.88259 | 6685.014 | 7.55092 | 6928.164 | 8.66216 |
| 6292.146 | 6.71485 | 6993.708 | 7.83562 | 7126.38  | 9.03457 | 6683.166 | 7.77202 | 6993.642 | 8.77933 |
| 6399.834 | 6.56043 | 7058.526 | 7.75963 | 7125.348 | 9.19194 | 6742.692 | 7.52935 | 6993.642 | 8.31948 |
| 6454.722 | 6.66142 | 7058.61  | 7.69345 | 7194.402 | 9.28704 | 6865.962 | 8.33531 | 6993.216 | 8.77393 |
| 6398.856 | 6.82957 | 7058.742 | 7.97044 | 7264.872 | 9.46206 | 6864.894 | 8.48091 | 6993.498 | 8.80286 |
| 6398.922 | 6.71632 | 7058.544 | 8.01456 | 7193.142 | 9.55667 | 6994.866 | 8.71573 | 6993.282 | 8.40282 |
| 6398.892 | 7.01831 | 7058.19  | 7.86111 | 7263.498 | 9.71111 | 6928.518 | 8.30442 | 6993.564 | 8.86169 |

|          |          |          |          |          |          |          |          |          |          |
|----------|----------|----------|----------|----------|----------|----------|----------|----------|----------|
| 6398.622 | 7.32324  | 7057.908 | 7.78219  | 7262.322 | 9.83317  | 6994.086 | 8.92555  | 7058.874 | 9.29114  |
| 6454.29  | 7.11587  | 7057.86  | 7.92534  | 7406.988 | 10.30037 | 6928.548 | 8.24314  | 7125.414 | 9.62205  |
| 6453.276 | 6.90114  | 7058.472 | 8.11653  | 7405.524 | 10.45479 | 6928.488 | 8.91526  | 7193.04  | 9.93188  |
| 6452.904 | 7.02076  | 7125.366 | 8.32145  | 7405.068 | 10.19742 | 6993.396 | 8.83682  | 7262.97  | 9.98287  |
| 6623.19  | 7.16342  | 7193.988 | 8.50333  | 7404.72  | 10.57539 | 6993.156 | 8.69612  | 7263.06  | 10.01032 |
| 6682.17  | 7.36638  | 7193.04  | 8.69452  | 7479     | 10.51117 | 7059.822 | 9.27313  | 7263.168 | 10.02061 |
| 6681.204 | 7.5213   | 7263.396 | 8.97151  | 7554.258 | 10.94307 | 6992.16  | 9.10302  | 7262.376 | 10.20053 |
| 6741.738 | 7.38795  | 7333.728 | 9.12691  | 7631.646 | 10.81904 | 7059.354 | 8.8829   | 7261.548 | 10.23387 |
| 6866.028 | 7.64239  | 7261.284 | 9.26173  | 7630.5   | 11.22643 | 7058.544 | 9.27117  | 7261.71  | 10.32996 |
| 6927.576 | 8.67287  | 7260.828 | 9.4642   | 7708.038 | 11.51763 | 7058.256 | 9.62758  | 7334.262 | 10.44957 |
| 6991.686 | 8.71013  | 7406.22  | 9.57156  | 7706.556 | 11.5995  | 7125.792 | 9.68396  | 7260.882 | 10.42457 |
| 6990.66  | 8.7317   | 7404.738 | 9.53381  | 7706.814 | 11.58823 | 7194.708 | 9.7722   | 7332.666 | 10.41036 |
| 7057.746 | 9.05232  | 7404.192 | 9.91718  | 7788.99  | 11.61225 | 7194.21  | 9.90996  | 7332.348 | 10.63881 |
| 6990.348 | 9.05183  | 7478.874 | 9.78678  | 7787.796 | 11.65441 | 7123.47  | 10.01732 | 7405.65  | 10.80255 |
| 7057.08  | 8.99055  | 7403.916 | 9.76815  | 7787.598 | 11.65931 | 7192.212 | 10.27715 | 7404.666 | 10.68097 |
| 7056.198 | 9.05085  | 7477.956 | 10.27555 | 7788.018 | 11.76668 | 7263.006 | 10.43549 | 7478.91  | 11.06237 |
| 7055.85  | 9.2489   | 7630.848 | 10.53537 | 7786.482 | 11.84217 | 7261.776 | 10.56688 | 7478.148 | 11.12267 |
| 7123.626 | 9.52736  | 7628.64  | 10.64519 | 7869.33  | 11.8358  | 7333.944 | 10.57325 | 7552.716 | 11.684   |
| 7191.246 | 9.81611  | 7706.814 | 10.83099 | 7869.696 | 11.83776 | 7333.26  | 10.74876 | 7628.796 | 11.63694 |
| 7190.364 | 9.89259  | 7706.634 | 10.97022 | 7870.296 | 11.83776 | 7332.702 | 11.03408 | 7628.484 | 11.57173 |
| 7260.738 | 10.01221 | 7787.574 | 11.08542 | 7869.246 | 11.84217 | 7331.646 | 11.07281 | 7628.97  | 11.74626 |
| 7331.592 | 10.23576 | 7786.866 | 11.16778 | 7869.018 | 11.91081 | 7403.73  | 11.21105 | 7628.388 | 11.77469 |
| 7330.896 | 10.55    | 7786.062 | 11.25848 | 7952.118 | 12.38683 | 7476.06  | 11.85915 | 7627.98  | 11.96834 |
| 7403.64  | 10.67256 | 7868.418 | 11.32221 | 8124.156 | 12.75304 | 7551.786 | 11.75228 | 7787.634 | 12.11835 |
| 7403.55  | 10.5549  | 7867.698 | 11.3379  | 8123.478 | 12.60597 | 7629.666 | 11.74542 | 7787.19  | 12.18404 |
| 7402.146 | 11.06377 | 7867.53  | 11.37123 | 8123.19  | 12.94864 | 7629.936 | 12.05574 | 7786.746 | 12.27866 |
| 7551.312 | 11.16966 | 7952.394 | 11.54331 | 8119.872 | 13.10013 | 7628.946 | 12.04397 | 7785.978 | 12.36935 |
| 7626.852 | 11.63931 | 7951.086 | 11.77813 | 8209.8   | 13.19573 | 7708.32  | 12.12486 | 7868.562 | 12.39975 |
| 7706.454 | 11.59617 | 8034.024 | 12.03502 | 8301.192 | 13.43447 | 7706.496 | 12.41067 | 7784.808 | 12.47966 |
| 7705.623 | 11.49077 | 8120.112 | 12.46398 | 8299.812 | 13.50507 | 7704.24  | 12.65334 | 7867.674 | 12.50172 |
| 7704.792 | 11.67608 | 8209.482 | 12.70419 | 8394.804 | 13.50752 | 7785.432 | 12.68521 | 7952.352 | 12.56496 |
| 7704.318 | 11.93591 | 8300.478 | 12.74538 | 8298.204 | 13.57664 | 7868.706 | 12.68324 | 7950.198 | 12.98166 |
| 7783.596 | 12.06484 | 8298.918 | 12.82872 | 8392.734 | 13.63498 | 7868.358 | 12.69991 | 8122.968 | 13.27385 |
| 7866.048 | 12.13544 | 8299.236 | 12.86695 | 8391.516 | 13.72175 | 7784.748 | 12.70236 | 8121.324 | 13.3817  |
| 7865.922 | 12.19328 | 8393.862 | 12.92529 | 8487.882 | 13.90902 | 7868.814 | 12.70629 | 8210.922 | 13.62486 |
| 7865.388 | 12.19083 | 8392.314 | 13.05227 | 8584.278 | 14.21591 | 7784.442 | 12.84846 | 8301.582 | 13.95332 |
| 7865.448 | 12.21437 | 8391.654 | 13.14639 | 8685.03  | 14.20807 | 7951.698 | 13.32693 | 8300.25  | 14.01656 |

|          |          |          |          |          |          |          |          |          |          |
|----------|----------|----------|----------|----------|----------|----------|----------|----------|----------|
| 7865.202 | 12.20113 | 8486.418 | 13.36063 | 8683.344 | 14.32916 | 8122.902 | 13.47792 | 8299.464 | 14.02097 |
| 7865.448 | 12.14328 | 8484.738 | 13.47338 | 8786.37  | 14.5331  | 8120.904 | 13.83678 | 8298.276 | 14.08863 |
| 7865.43  | 12.14818 | 8484.498 | 13.3768  | 8784.93  | 14.58997 | 8119.08  | 13.8054  | 8391.846 | 14.19599 |
| 7864.914 | 12.1977  | 8485.146 | 13.28562 | 8783.85  | 14.51692 | 8209.734 | 13.93385 | 8389.542 | 14.26021 |
| 7948.494 | 12.66146 | 8485.794 | 13.26356 | 8783.718 | 14.67331 | 8206.854 | 14.30153 | 8389.518 | 14.37051 |
| 8118.462 | 13.17867 | 8485.818 | 13.31209 | 8782.59  | 14.62281 | 8298.546 | 14.36085 | 8582.706 | 14.79408 |
| 8207.778 | 13.28554 | 8485.986 | 13.40083 | 8889.468 | 14.67086 | 8297.79  | 14.35496 | 8678.976 | 15.08234 |
| 8207.622 | 13.1669  | 8584.062 | 13.5881  | 8781.87  | 14.7591  | 8297.22  | 14.41869 | 8782.716 | 15.14068 |
| 8207.778 | 13.36937 | 8581.284 | 13.56113 | 8780.76  | 14.69488 | 8391.702 | 14.5388  | 8782.05  | 15.06322 |
| 8206.296 | 13.47673 | 8683.02  | 13.7136  | 8780.634 | 14.63066 | 8486.97  | 14.67166 | 8781.33  | 15.17598 |
| 8298.342 | 13.43604 | 8682.69  | 13.74792 | 8781.276 | 14.76106 | 8484.786 | 14.72558 | 8780.862 | 15.27158 |
| 8297.448 | 13.55321 | 8680.656 | 13.92881 | 8887.362 | 14.80911 | 8584.404 | 14.79079 | 8887.254 | 15.2103  |
| 8294.742 | 13.75666 | 8782.074 | 13.93764 | 8885.676 | 14.84489 | 8582.904 | 14.9962  | 8779.554 | 15.24608 |
| 8389.194 | 13.84294 | 8781.33  | 14.0803  | 8885.28  | 14.82577 | 8581.65  | 15.05552 | 8886.702 | 15.3559  |
| 8485.842 | 13.89295 | 8781.252 | 13.9999  | 8885.1   | 14.80371 | 8680.38  | 15.42957 | 8884.938 | 15.48532 |
| 8387.832 | 13.95864 | 8781.354 | 13.93176 | 8885.388 | 14.80861 | 8780.916 | 15.50507 | 8993.046 | 15.50003 |
| 8483.562 | 14.06747 | 8781.018 | 14.07687 | 8994.342 | 14.94245 | 8779.938 | 15.59184 | 8883.258 | 15.49905 |
| 8581.896 | 14.18856 | 8887.728 | 14.05285 | 8992.566 | 15.0003  | 8780.196 | 15.57076 | 8992.104 | 15.55003 |
| 8579.862 | 14.19641 | 8780.658 | 13.99353 | 8990.598 | 15.09197 | 8779.452 | 15.54821 | 8992.026 | 15.58778 |
| 8579.736 | 14.31504 | 8887.044 | 14.0901  | 9101.886 | 15.16257 | 8885.232 | 15.69724 | 8990.598 | 15.66867 |
| 8681.16  | 14.3974  | 8886.57  | 14.1504  | 8988.414 | 15.19149 | 8883.648 | 15.80215 | 8989.17  | 15.74662 |
| 8680.806 | 14.40084 | 8779.068 | 14.10236 | 8988.762 | 15.16551 | 8883.336 | 15.82715 | 9100.782 | 15.9888  |
| 8780.61  | 14.81215 | 8885.016 | 14.19158 | 8988.738 | 15.21012 | 8881.89  | 15.89186 | 9207.366 | 16.56973 |
| 8778.192 | 14.76753 | 8883.57  | 14.28081 | 9100.23  | 15.27777 | 8990.514 | 15.96148 | 9441.594 | 16.67513 |
| 8777.808 | 14.80136 | 8883.15  | 14.3112  | 9156.216 | 15.49446 | 8989.14  | 16.01982 | 9439.722 | 16.85456 |
| 8883.834 | 14.93029 | 8882.862 | 14.32248 | 9212.202 | 15.59398 | 9098.88  | 16.35171 | 9438.828 | 16.95898 |
| 8777.142 | 14.89353 | 8992.776 | 14.35679 | 9210.108 | 15.769   | 9326.01  | 16.7238  | 9562.548 | 16.9732  |
| 8777.19  | 14.78322 | 8991.27  | 14.42641 | 9444.684 | 16.22688 |          |          | 9437.406 | 17.11978 |
| 8777.244 | 14.90921 | 8989.974 | 14.46808 | 9563.214 | 16.43866 |          |          | 9559.44  | 17.1639  |
| 8777.19  | 15.03423 | 8989.626 | 14.50779 |          |          |          |          | 9559.47  | 17.15998 |
| 8882.07  | 15.12639 | 8988.738 | 14.48769 |          |          |          |          | 9559.71  | 17.17126 |
| 8989.41  | 15.24944 | 8988.954 | 14.53426 |          |          |          |          |          |          |
| 8988.198 | 15.26366 | 8988.012 | 14.60878 |          |          |          |          |          |          |
| 8988.066 | 15.20336 | 9100.038 | 14.66957 |          |          |          |          |          |          |
| 8988.252 | 15.26268 | 9098.85  | 14.72496 |          |          |          |          |          |          |
| 9099.234 | 15.41024 | 9100.2   | 14.7083  |          |          |          |          |          |          |
| 8985.024 | 15.44652 | 9098.214 | 14.89998 |          |          |          |          |          |          |



|          |          |          |          |  |  |  |  |  |  |
|----------|----------|----------|----------|--|--|--|--|--|--|
| 9096.918 | 15.48966 | 9207.144 | 15.41326 |  |  |  |  |  |  |
| 9096.312 | 15.45534 | 9441.414 | 15.51327 |  |  |  |  |  |  |
| 9210.846 | 15.57104 | 9440.526 | 15.57259 |  |  |  |  |  |  |
| 9209.292 | 16.08285 | 9440.55  | 15.67554 |  |  |  |  |  |  |
| 9319.404 | 16.32846 | 9439.128 | 15.79467 |  |  |  |  |  |  |
| 9316.452 | 16.52112 | 9561.39  | 15.87997 |  |  |  |  |  |  |
| 9437.67  | 16.56132 | 9561.144 | 15.86918 |  |  |  |  |  |  |
| 9437.256 | 16.58878 | 9561.219 | 15.8937  |  |  |  |  |  |  |
| 9434.466 | 16.76968 | 9561.294 | 15.89223 |  |  |  |  |  |  |
| 9558.312 | 16.82017 | 9561.6   | 15.88291 |  |  |  |  |  |  |
|          |          | 9561.69  | 15.95988 |  |  |  |  |  |  |

Data of Figure 10b

| Experiment 1 |             | Experiment 2 |             | Experiment 3 |             | Experiment 4 |             | Experiment 5 |             |
|--------------|-------------|--------------|-------------|--------------|-------------|--------------|-------------|--------------|-------------|
| Speed(r/min) | Torque(N·m) |
| 1350.648     | 0.01017     | 1697.19      | 0.00933     | 1142.862     | 0.01507     | 1220.28      | 0.01505     | 1607.148     | 0.01064     |
| 1708.158     | 0.00846     | 1926.66      | 0.00852     | 2110.17      | 0.01198     | 1794.186     | 0.0127      | 1912.266     | 0.00979     |
| 2085.69      | 0.00838     | 2221.326     | 0.00891     | 2338.776     | 0.01106     | 2367.87      | 0.01138     | 2268.276     | 0.00922     |
| 2267.352     | 0.00791     | 2420.676     | 0.00849     | 2727.186     | 0.01148     | 2736.714     | 0.01048     | 2468.466     | 0.00894     |
| 2412.192     | 0.00831     | 2568.87      | 0.00849     | 2894.37      | 0.01069     | 2927.67      | 0.01016     | 2604.618     | 0.00937     |
| 2533.632     | 0.00741     | 2659.374     | 0.00806     | 3021.762     | 0.0108      | 3021.378     | 0.01009     | 2707.332     | 0.00952     |
| 2649.174     | 0.00814     | 2746.41      | 0.00824     | 3095.976     | 0.0105      | 3058.014     | 0.00959     | 2818.44      | 0.01055     |
| 2715.906     | 0.008       | 2786.94      | 0.00838     | 3147.642     | 0.01053     | 3108.444     | 0.00966     | 2919.921     | 0.01028     |
| 2765.64      | 0.00786     | 2828.634     | 0.0081      | 3200.88      | 0.01088     | 3134.166     | 0.01032     | 3021.402     | 0.01083     |
| 2796.432     | 0.00817     | 2850.078     | 0.00808     | 3228.318     | 0.01145     | 3147.228     | 0.01002     | 3070.482     | 0.01141     |
| 2827.812     | 0.00842     | 2871.804     | 0.00833     | 3284.544     | 0.01305     | 3173.664     | 0.01033     | 3160.392     | 0.01138     |
| 2838.516     | 0.00831     | 2882.64      | 0.00868     | 3387.57      | 0.01256     | 3214.14      | 0.00988     | 3228.006     | 0.01094     |
| 2881.764     | 0.00828     | 2916.432     | 0.00932     | 3426.42      | 0.01245     | 3214.128     | 0.00991     | 3255.732     | 0.01155     |
| 2892.858     | 0.0089      | 2950.224     | 0.00974     | 3465.27      | 0.01247     | 3200.598     | 0.00965     | 3284.07      | 0.01205     |
| 2892.87      | 0.00838     | 3008.922     | 0.00909     | 3497.448     | 0.01268     | 3200.562     | 0.01088     | 3342.138     | 0.01304     |
| 2926.482     | 0.00808     | 3033.174     | 0.01004     | 3513.666     | 0.01235     | 3241.734     | 0.01039     | 3417.798     | 0.01302     |
| 2915.256     | 0.00833     | 3057.78      | 0.00969     | 3513.684     | 0.01351     | 3255.708     | 0.01044     | 3464.922     | 0.01256     |
| 2926.518     | 0.00798     | 3095.292     | 0.01052     | 3546.6       | 0.01448     | 3255.726     | 0.01048     | 3480.792     | 0.01233     |
| 2915.238     | 0.00796     | 3160.092     | 0.0109      | 3649.41      | 0.01394     | 3269.784     | 0.01046     | 3513.144     | 0.01314     |
| 2903.964     | 0.00786     | 3200.316     | 0.01062     | 3667.116     | 0.01399     | 3284.064     | 0.01143     | 3546.24      | 0.01378     |
| 2909.58      | 0.00879     | 3227.676     | 0.0102      | 3703.062     | 0.01401     | 3298.404     | 0.01146     | 3579.804     | 0.0139      |
| 2915.196     | 0.00877     | 3241.386     | 0.01179     | 3721.308     | 0.01598     | 3342.234     | 0.01224     | 3631.458     | 0.0135      |
| 2960.952     | 0.00886     | 3298.08      | 0.01048     | 3796.164     | 0.01768     | 3387.18      | 0.01238     | 3649.002     | 0.01367     |
| 2960.964     | 0.00941     | 3312.57      | 0.01281     | 3934.422     | 0.01845     | 3448.998     | 0.01189     | 3684.696     | 0.01441     |
| 2996.148     | 0.00937     | 3372.804     | 0.01226     | 4061.346     | 0.02117     | 3480.792     | 0.01217     | 3720.972     | 0.01441     |
| 3032.316     | 0.00992     | 3433.038     | 0.0127      | 4243.926     | 0.02048     | 3513.162     | 0.01231     | 3757.974     | 0.01743     |
| 3076.152     | 0.01001     | 3464.574     | 0.01242     | 4366.59      | 0.02068     | 3513.114     | 0.01236     | 3853.812     | 0.01995     |
| 3119.988     | 0.01056     | 3512.898     | 0.01288     | 4443.768     | 0.02255     | 3529.656     | 0.01272     | 4017.72      | 0.01969     |
| 3185.838     | 0.01064     | 3545.838     | 0.01272     | 4550.778     | 0.02108     | 3529.536     | 0.01335     | 4219.752     | 0.02015     |
| 3212.916     | 0.01041     | 3545.922     | 0.01348     | 4578.264     | 0.02175     | 3596.772     | 0.01339     | 4316.166     | 0.02068     |
| 3240.564     | 0.01059     | 3579.456     | 0.01304     | 4606.29      | 0.02326     | 3613.95      | 0.01318     | 4391.604     | 0.02131     |
| 3240.504     | 0.01041     | 3613.716     | 0.01403     | 4678.701     | 0.02408     | 3631.326     | 0.01289     | 4469.562     | 0.02175     |
| 3254.49      | 0.01011     | 3684.252     | 0.01376     | 4751.112     | 0.0243      | 3648.918     | 0.01371     | 4551.762     | 0.0229      |
| 3268.578     | 0.01149     | 3702.282     | 0.01419     | 4842.546     | 0.02408     | 3684.456     | 0.01348     | 4633.962     | 0.02329     |

|          |         |          |         |          |         |          |         |          |         |
|----------|---------|----------|---------|----------|---------|----------|---------|----------|---------|
| 3297.234 | 0.01181 | 3720.624 | 0.01405 | 4873.632 | 0.024   | 3721.125 | 0.01584 | 4691.478 | 0.02373 |
| 3355.776 | 0.01218 | 3739.008 | 0.0148  | 4905.39  | 0.02387 | 3757.794 | 0.01748 | 4750.446 | 0.02274 |
| 3416.58  | 0.01377 | 3795.408 | 0.01609 | 4905.228 | 0.02454 | 3933.978 | 0.01676 | 4750.518 | 0.02243 |
| 3495.66  | 0.01334 | 3885.225 | 0.0172  | 4937.394 | 0.02491 | 3996.438 | 0.02031 | 4750.422 | 0.02294 |
| 3561.606 | 0.01327 | 3975.042 | 0.01754 | 4937.412 | 0.02476 | 4150.194 | 0.02144 | 4780.71  | 0.02408 |
| 3595.59  | 0.01343 | 4038.774 | 0.01728 | 4970.04  | 0.02557 | 4340.97  | 0.02002 | 4810.956 | 0.02431 |
| 3630.144 | 0.01377 | 4104.732 | 0.01728 | 5036.202 | 0.02603 | 4417.212 | 0.02017 | 4841.772 | 0.02451 |
| 3665.34  | 0.01364 | 4127.1   | 0.01982 | 5035.98  | 0.02671 | 4443.018 | 0.02015 | 4904.976 | 0.02419 |
| 3701.412 | 0.01483 | 4242.984 | 0.02107 | 5069.742 | 0.02735 | 4442.958 | 0.01949 | 4904.664 | 0.02428 |
| 3756.576 | 0.0152  | 4391.034 | 0.02156 | 5138.862 | 0.02693 | 4443.06  | 0.02103 | 4937.1   | 0.02445 |
| 3832.926 | 0.01613 | 4522.758 | 0.02301 | 5174.142 | 0.02723 | 4495.95  | 0.02101 | 4936.896 | 0.02474 |
| 3892.062 | 0.01721 | 4662.246 | 0.02351 | 5209.908 | 0.0273  | 4550.202 | 0.02219 | 4936.896 | 0.02539 |
| 3995.166 | 0.01862 | 4720.53  | 0.02273 | 5246.232 | 0.02881 | 4605.516 | 0.02156 | 4969.284 | 0.02537 |
| 4081.494 | 0.02    | 4780.206 | 0.02351 | 5282.49  | 0.03051 | 4633.854 | 0.02182 | 5002.374 | 0.02493 |
| 4241.946 | 0.02016 | 4810.686 | 0.02451 | 5396.112 | 0.03296 | 4662.666 | 0.02189 | 5002.17  | 0.0253  |
| 4339.518 | 0.02102 | 4872.906 | 0.02372 | 5554.494 | 0.03326 | 4691.478 | 0.02264 | 5002.392 | 0.02518 |
| 4441.758 | 0.02042 | 4872.708 | 0.02441 | 5637.552 | 0.03268 | 4691.442 | 0.02144 | 5002.242 | 0.02465 |
| 4494.534 | 0.02032 | 4904.382 | 0.02386 | 5680.02  | 0.03279 | 4691.442 | 0.02191 | 5002.182 | 0.02678 |
| 4521.24  | 0.02153 | 4904.364 | 0.02382 | 5679.762 | 0.03602 | 4691.322 | 0.02158 | 5069.346 | 0.02754 |
| 4548.546 | 0.02134 | 4936.548 | 0.02377 | 5810.868 | 0.03801 | 4691.496 | 0.02209 | 5138.586 | 0.02733 |
| 4604.208 | 0.02203 | 4904.202 | 0.02449 | 5947.8   | 0.03723 | 4691.304 | 0.02361 | 5173.566 | 0.02686 |
| 4632.438 | 0.02166 | 4936.482 | 0.02411 | 6043.65  | 0.03729 | 4780.518 | 0.02428 | 5173.5   | 0.02719 |
| 4660.962 | 0.02222 | 4936.47  | 0.02442 | 6092.412 | 0.03713 | 4810.908 | 0.02384 | 5209.29  | 0.02731 |
| 4689.984 | 0.02247 | 4968.87  | 0.02481 | 6092.424 | 0.03692 | 4841.766 | 0.02407 | 5209.362 | 0.02737 |
| 4719.294 | 0.02118 | 4968.936 | 0.02615 | 6092.346 | 0.03676 | 4904.832 | 0.02424 | 5245.554 | 0.0319  |
| 4719.366 | 0.02242 | 5001.624 | 0.02555 | 6092.262 | 0.03778 | 4904.688 | 0.02414 | 5395.236 | 0.03104 |
| 4719.234 | 0.02372 | 5035.224 | 0.02511 | 6092.508 | 0.03723 | 4904.76  | 0.02403 | 5473.284 | 0.03104 |
| 4809.45  | 0.02422 | 5069.1   | 0.02668 | 6092.37  | 0.03744 | 4904.526 | 0.02474 | 5513.46  | 0.03084 |
| 4840.35  | 0.02407 | 5103.114 | 0.02689 | 6043.038 | 0.03753 | 4936.746 | 0.02461 | 5513.244 | 0.03277 |
| 4871.568 | 0.02554 | 5173.218 | 0.02711 | 6043.062 | 0.03692 | 4969.008 | 0.02544 | 5637.234 | 0.03593 |
| 4935.15  | 0.02566 | 5173.164 | 0.02735 | 6043.002 | 0.03711 | 4968.936 | 0.02553 | 5810.742 | 0.03639 |
| 5034.066 | 0.02466 | 5173.11  | 0.02749 | 6043.182 | 0.03695 | 5035.398 | 0.02583 | 5901.06  | 0.0363  |
| 5000.55  | 0.02543 | 5245.068 | 0.0276  | 6092.358 | 0.03727 | 5035.296 | 0.02707 | 5947.506 | 0.0364  |
| 5034.072 | 0.02612 | 5281.848 | 0.02998 | 6092.136 | 0.03852 | 5103.57  | 0.02655 | 5995.122 | 0.03656 |
| 5101.986 | 0.0276  | 5356.56  | 0.02981 | 6091.728 | 0.03845 | 5138.298 | 0.02929 | 5994.846 | 0.03624 |
| 5171.94  | 0.0278  | 5433.492 | 0.02908 | 6141.474 | 0.0385  | 5245.212 | 0.03081 | 5994.654 | 0.03676 |
| 5207.382 | 0.02974 | 5433.72  | 0.02938 | 6141.372 | 0.03782 | 5395.17  | 0.0306  | 6043.05  | 0.03619 |

|          |         |          |         |          |         |          |         |          |         |
|----------|---------|----------|---------|----------|---------|----------|---------|----------|---------|
| 5317.662 | 0.03066 | 5433.642 | 0.02963 | 6141.234 | 0.0387  | 5433.798 | 0.03065 | 6042.99  | 0.03681 |
| 5432.28  | 0.03083 | 5473.116 | 0.03104 | 6192.042 | 0.0397  | 5513.346 | 0.0306  | 6042.93  | 0.0369  |
| 5471.526 | 0.0312  | 5513.076 | 0.03288 | 6191.82  | 0.04076 | 5513.154 | 0.03148 | 6042.648 | 0.03684 |
| 5552.286 | 0.03152 | 5553.222 | 0.03459 | 6294.888 | 0.04115 | 5512.812 | 0.0367  | 6091.74  | 0.03707 |
| 5593.194 | 0.03006 | 5721.666 | 0.03547 | 6347.946 | 0.04013 | 5721.786 | 0.03818 | 6042.42  | 0.03651 |
| 5593.572 | 0.03299 | 5809.428 | 0.03471 | 6347.502 | 0.04082 | 5947.152 | 0.03709 | 6042.684 | 0.03736 |
| 5634.996 | 0.03563 | 5854.572 | 0.03439 | 6402.156 | 0.04147 | 6042.696 | 0.03714 | 6042.342 | 0.03734 |
| 5764.008 | 0.03518 | 5900.526 | 0.03579 | 6347.382 | 0.03969 | 6042.354 | 0.03688 | 6042.294 | 0.0376  |
| 5853.522 | 0.03632 | 5947.092 | 0.03642 | 6347.166 | 0.04103 | 6042.342 | 0.03702 | 6091.566 | 0.03921 |
| 5945.88  | 0.03729 | 5946.516 | 0.03672 | 6401.472 | 0.04244 | 6091.494 | 0.03698 | 6191.454 | 0.04115 |
| 5992.488 | 0.0368  | 6042.456 | 0.03679 | 6400.986 | 0.04104 | 6042.03  | 0.03704 | 6294.558 | 0.04119 |
| 6040.884 | 0.0365  | 6042.516 | 0.03679 | 6456.402 | 0.04216 | 6042.09  | 0.037   | 6293.982 | 0.0402  |
| 6040.788 | 0.03715 | 6042.078 | 0.03724 | 6512.934 | 0.04339 | 6042.018 | 0.03739 | 6347.622 | 0.0402  |
| 6089.85  | 0.03673 | 6091.134 | 0.0369  | 6511.362 | 0.0463  | 6091.296 | 0.03709 | 6347.232 | 0.03988 |
| 6040.518 | 0.0368  | 6091.11  | 0.03715 | 6745.938 | 0.04535 | 6042.198 | 0.03737 | 6347.484 | 0.03958 |
| 6040.518 | 0.03676 | 6091.146 | 0.03738 | 6744.486 | 0.04735 | 6091.332 | 0.03766 | 6347.298 | 0.04205 |
| 6089.922 | 0.03657 | 6090.606 | 0.03784 | 6806.118 | 0.04627 | 6091.026 | 0.03771 | 6346.626 | 0.0406  |
| 6089.892 | 0.03691 | 6140.292 | 0.03983 | 6805.944 | 0.04632 | 6090.96  | 0.03882 | 6400.602 | 0.0433  |
| 6089.862 | 0.03685 | 6242.16  | 0.04015 | 6805.206 | 0.04964 | 6191.424 | 0.0391  | 6511.32  | 0.04429 |
| 6089.838 | 0.03719 | 6241.692 | 0.03999 | 6867.048 | 0.0481  | 6190.674 | 0.04018 | 6626.16  | 0.04459 |
| 6089.502 | 0.03758 | 6347.256 | 0.04179 | 6930.888 | 0.05008 | 6216.318 | 0.03991 | 6624.372 | 0.0436  |
| 6089.208 | 0.03724 | 6346.182 | 0.04078 | 6929.892 | 0.04869 | 6241.962 | 0.03993 | 6744.786 | 0.0456  |
| 6139.566 | 0.03825 | 6400.572 | 0.04022 | 6930.036 | 0.051   | 6241.626 | 0.04131 | 6744.408 | 0.04383 |
| 6138.984 | 0.03908 | 6400.314 | 0.04075 | 6995.418 | 0.04959 | 6347.31  | 0.04208 | 6683.556 | 0.04472 |
| 6241.278 | 0.03957 | 6456.138 | 0.04324 | 6994.44  | 0.0501  | 6400.698 | 0.04156 | 6683.85  | 0.04265 |
| 6240.822 | 0.03962 | 6455.364 | 0.04301 | 6994.542 | 0.05098 | 6455.61  | 0.04168 | 6684     | 0.04445 |
| 6240.222 | 0.03961 | 6567.87  | 0.04283 | 6994.212 | 0.0492  | 6455.4   | 0.04291 | 6683.184 | 0.04542 |
| 6240.156 | 0.03959 | 6567.324 | 0.04474 | 6994.116 | 0.05026 | 6511.548 | 0.0445  | 6742.86  | 0.04987 |
| 6292.752 | 0.03976 | 6684.27  | 0.04537 | 6994.26  | 0.05133 | 6567.354 | 0.04367 | 6865.914 | 0.04966 |
| 6292.446 | 0.03927 | 6743.784 | 0.0474  | 7060.602 | 0.05208 | 6625.47  | 0.0439  | 6928.902 | 0.05063 |
| 6239.886 | 0.04146 | 6867.096 | 0.05083 | 7058.826 | 0.05153 | 6685.014 | 0.04466 | 6928.164 | 0.05036 |
| 6292.146 | 0.04142 | 6993.708 | 0.0516  | 7126.38  | 0.05373 | 6683.166 | 0.04498 | 6993.642 | 0.04922 |
| 6399.834 | 0.04156 | 7058.526 | 0.0503  | 7125.348 | 0.05322 | 6742.692 | 0.04936 | 6993.642 | 0.05045 |
| 6454.722 | 0.04125 | 7058.61  | 0.05151 | 7194.402 | 0.05352 | 6865.962 | 0.0481  | 6993.216 | 0.0502  |
| 6398.856 | 0.04142 | 7058.742 | 0.05015 | 7264.872 | 0.05407 | 6864.894 | 0.04932 | 6993.498 | 0.04941 |
| 6398.922 | 0.04128 | 7058.544 | 0.05074 | 7193.142 | 0.05375 | 6994.866 | 0.04817 | 6993.282 | 0.05022 |
| 6398.892 | 0.04038 | 7058.19  | 0.05079 | 7263.498 | 0.0549  | 6928.518 | 0.04951 | 6993.564 | 0.05169 |

|          |         |          |         |          |         |          |         |          |         |
|----------|---------|----------|---------|----------|---------|----------|---------|----------|---------|
| 6398.622 | 0.04186 | 7057.908 | 0.05125 | 7262.322 | 0.05728 | 6994.086 | 0.0483  | 7058.874 | 0.05213 |
| 6454.29  | 0.04209 | 7057.86  | 0.05144 | 7406.988 | 0.05573 | 6928.548 | 0.05004 | 7125.414 | 0.05455 |
| 6453.276 | 0.0431  | 7058.472 | 0.05132 | 7405.524 | 0.05795 | 6928.488 | 0.04946 | 7193.04  | 0.05398 |
| 6452.904 | 0.04554 | 7125.366 | 0.05236 | 7405.068 | 0.0573  | 6993.396 | 0.0495  | 7262.97  | 0.05435 |
| 6623.19  | 0.04548 | 7193.988 | 0.05315 | 7404.72  | 0.05672 | 6993.156 | 0.05073 | 7263.06  | 0.05428 |
| 6682.17  | 0.04478 | 7193.04  | 0.05342 | 7479     | 0.0597  | 7059.822 | 0.04997 | 7263.168 | 0.0549  |
| 6681.204 | 0.04548 | 7263.396 | 0.05541 | 7554.258 | 0.05989 | 6992.16  | 0.04973 | 7262.376 | 0.05529 |
| 6741.738 | 0.04776 | 7333.728 | 0.05524 | 7631.646 | 0.06097 | 7059.354 | 0.05116 | 7261.548 | 0.05347 |
| 6866.028 | 0.05011 | 7261.284 | 0.05478 | 7630.5   | 0.06233 | 7058.544 | 0.05126 | 7261.71  | 0.05419 |
| 6927.576 | 0.04921 | 7260.828 | 0.05457 | 7708.038 | 0.06265 | 7058.256 | 0.05149 | 7334.262 | 0.05575 |
| 6991.686 | 0.05007 | 7406.22  | 0.05736 | 7706.556 | 0.06268 | 7125.792 | 0.05222 | 7260.882 | 0.05553 |
| 6990.66  | 0.05124 | 7404.738 | 0.05704 | 7706.814 | 0.06233 | 7194.708 | 0.05297 | 7332.666 | 0.05642 |
| 7057.746 | 0.05002 | 7404.192 | 0.05608 | 7788.99  | 0.06198 | 7194.21  | 0.05299 | 7332.348 | 0.05555 |
| 6990.348 | 0.05108 | 7478.874 | 0.05818 | 7787.796 | 0.06261 | 7123.47  | 0.05299 | 7405.65  | 0.05763 |
| 7057.08  | 0.05064 | 7403.916 | 0.0585  | 7787.598 | 0.06275 | 7192.212 | 0.0541  | 7404.666 | 0.05733 |
| 7056.198 | 0.05178 | 7477.956 | 0.06043 | 7788.018 | 0.06397 | 7263.006 | 0.05474 | 7478.91  | 0.05809 |
| 7055.85  | 0.05152 | 7630.848 | 0.06115 | 7786.482 | 0.06394 | 7261.776 | 0.05462 | 7478.148 | 0.06116 |
| 7123.626 | 0.05297 | 7628.64  | 0.06177 | 7869.33  | 0.06418 | 7333.944 | 0.05543 | 7552.716 | 0.06212 |
| 7191.246 | 0.05424 | 7706.814 | 0.06314 | 7869.696 | 0.06408 | 7333.26  | 0.05606 | 7628.796 | 0.05921 |
| 7190.364 | 0.05365 | 7706.634 | 0.06113 | 7870.296 | 0.06443 | 7332.702 | 0.05454 | 7628.484 | 0.06233 |
| 7260.738 | 0.05429 | 7787.574 | 0.06327 | 7869.246 | 0.06425 | 7331.646 | 0.0582  | 7628.97  | 0.05966 |
| 7331.592 | 0.05584 | 7786.866 | 0.0641  | 7869.018 | 0.06584 | 7403.73  | 0.06032 | 7628.388 | 0.06152 |
| 7330.896 | 0.05457 | 7786.062 | 0.0644  | 7952.118 | 0.07036 | 7476.06  | 0.05984 | 7627.98  | 0.06201 |
| 7403.64  | 0.05729 | 7868.418 | 0.0644  | 8124.156 | 0.06911 | 7551.786 | 0.05942 | 7787.634 | 0.06321 |
| 7403.55  | 0.05653 | 7867.698 | 0.06517 | 8123.478 | 0.06893 | 7629.666 | 0.06072 | 7787.19  | 0.06326 |
| 7402.146 | 0.05925 | 7867.53  | 0.06445 | 8123.19  | 0.07135 | 7629.936 | 0.06067 | 7786.746 | 0.06422 |
| 7551.312 | 0.06227 | 7952.394 | 0.06526 | 8119.872 | 0.07069 | 7628.946 | 0.06063 | 7785.978 | 0.06376 |
| 7626.852 | 0.06082 | 7951.086 | 0.0698  | 8209.8   | 0.07371 | 7708.32  | 0.06247 | 7868.562 | 0.06441 |
| 7706.454 | 0.0605  | 8034.024 | 0.07059 | 8301.192 | 0.07306 | 7706.496 | 0.06473 | 7784.808 | 0.06508 |
| 7705.623 | 0.06084 | 8120.112 | 0.07165 | 8299.812 | 0.07405 | 7704.24  | 0.06388 | 7867.674 | 0.06611 |
| 7704.792 | 0.06373 | 8209.482 | 0.07223 | 8394.804 | 0.07366 | 7785.432 | 0.06379 | 7952.352 | 0.06679 |
| 7704.318 | 0.06373 | 8300.478 | 0.07223 | 8298.204 | 0.07477 | 7868.706 | 0.06362 | 7950.198 | 0.06941 |
| 7783.596 | 0.06437 | 8298.918 | 0.07377 | 8392.734 | 0.0752  | 7868.358 | 0.06369 | 8122.968 | 0.07039 |
| 7866.048 | 0.06447 | 8299.236 | 0.07306 | 8391.516 | 0.07604 | 7784.748 | 0.06349 | 8121.324 | 0.06995 |
| 7865.922 | 0.06393 | 8393.862 | 0.07364 | 8487.882 | 0.07857 | 7868.814 | 0.06348 | 8210.922 | 0.07327 |
| 7865.388 | 0.06378 | 8392.314 | 0.07495 | 8584.278 | 0.07911 | 7784.442 | 0.06589 | 8301.582 | 0.07343 |
| 7865.448 | 0.06389 | 8391.654 | 0.07647 | 8685.03  | 0.08105 | 7951.698 | 0.07041 | 8300.25  | 0.07271 |

|          |         |          |         |          |         |          |         |          |         |
|----------|---------|----------|---------|----------|---------|----------|---------|----------|---------|
| 7865.202 | 0.06433 | 8486.418 | 0.07687 | 8683.344 | 0.0804  | 8122.902 | 0.06963 | 8299.464 | 0.07327 |
| 7865.448 | 0.06447 | 8484.738 | 0.07679 | 8786.37  | 0.08257 | 8120.904 | 0.07073 | 8298.276 | 0.07433 |
| 7865.43  | 0.06504 | 8484.498 | 0.07728 | 8784.93  | 0.08102 | 8119.08  | 0.06965 | 8391.846 | 0.07622 |
| 7864.914 | 0.06603 | 8485.146 | 0.0765  | 8783.85  | 0.08203 | 8209.734 | 0.07276 | 8389.542 | 0.07617 |
| 7948.494 | 0.0709  | 8485.794 | 0.07622 | 8783.718 | 0.083   | 8206.854 | 0.07396 | 8389.518 | 0.07885 |
| 8118.462 | 0.07118 | 8485.818 | 0.07594 | 8782.59  | 0.08206 | 8298.546 | 0.07244 | 8582.706 | 0.08202 |
| 8207.778 | 0.06964 | 8485.986 | 0.07797 | 8889.468 | 0.08335 | 8297.79  | 0.07362 | 8678.976 | 0.08257 |
| 8207.622 | 0.07046 | 8584.062 | 0.08002 | 8781.87  | 0.08425 | 8297.22  | 0.07424 | 8782.716 | 0.08188 |
| 8207.778 | 0.07176 | 8581.284 | 0.07968 | 8780.76  | 0.08231 | 8391.702 | 0.07606 | 8782.05  | 0.08289 |
| 8206.296 | 0.0709  | 8683.02  | 0.07931 | 8780.634 | 0.08372 | 8486.97  | 0.07687 | 8781.33  | 0.0833  |
| 8298.342 | 0.07158 | 8682.69  | 0.08141 | 8781.276 | 0.0839  | 8484.786 | 0.07694 | 8780.862 | 0.08255 |
| 8297.448 | 0.0746  | 8680.656 | 0.08222 | 8887.362 | 0.08555 | 8584.404 | 0.07685 | 8887.254 | 0.08333 |
| 8294.742 | 0.07453 | 8782.074 | 0.08277 | 8885.676 | 0.08448 | 8582.904 | 0.07761 | 8779.554 | 0.08384 |
| 8389.194 | 0.07483 | 8781.33  | 0.08268 | 8885.28  | 0.08393 | 8581.65  | 0.08204 | 8886.702 | 0.08559 |
| 8485.842 | 0.07501 | 8781.252 | 0.08138 | 8885.1   | 0.08483 | 8680.38  | 0.08259 | 8884.938 | 0.08527 |
| 8387.832 | 0.07554 | 8781.354 | 0.08302 | 8885.388 | 0.08571 | 8780.916 | 0.08303 | 8993.046 | 0.08515 |
| 8483.562 | 0.07684 | 8781.018 | 0.08321 | 8994.342 | 0.08654 | 8779.938 | 0.08319 | 8883.258 | 0.08633 |
| 8581.896 | 0.07891 | 8887.728 | 0.08229 | 8992.566 | 0.08758 | 8780.196 | 0.08231 | 8992.104 | 0.08591 |
| 8579.862 | 0.07856 | 8780.658 | 0.08351 | 8990.598 | 0.08771 | 8779.452 | 0.08361 | 8992.026 | 0.08681 |
| 8579.736 | 0.07822 | 8887.044 | 0.08369 | 9101.886 | 0.08781 | 8885.232 | 0.08557 | 8990.598 | 0.08824 |
| 8681.16  | 0.07917 | 8886.57  | 0.08316 | 8988.414 | 0.08831 | 8883.648 | 0.08532 | 8989.17  | 0.08877 |
| 8680.806 | 0.08226 | 8779.068 | 0.08356 | 8988.762 | 0.08923 | 8883.336 | 0.08608 | 9100.782 | 0.09606 |
| 8780.61  | 0.08344 | 8885.016 | 0.08568 | 8988.738 | 0.09034 | 8881.89  | 0.08712 | 9207.366 | 0.09454 |
| 8778.192 | 0.08239 | 8883.57  | 0.08568 | 9100.23  | 0.09013 | 8990.514 | 0.08707 | 9441.594 | 0.09814 |
| 8777.808 | 0.08383 | 8883.15  | 0.08522 | 9156.216 | 0.08974 | 8989.14  | 0.08877 | 9439.722 | 0.09861 |
| 8883.834 | 0.08382 | 8882.862 | 0.08554 | 9212.202 | 0.09297 | 9098.88  | 0.09245 | 9438.828 | 0.09692 |
| 8777.142 | 0.08237 | 8992.776 | 0.08695 | 9210.108 | 0.09618 | 9326.01  | 0.09282 | 9562.548 | 0.09867 |
| 8777.19  | 0.08286 | 8991.27  | 0.0872  | 9444.684 | 0.09994 |          |         | 9437.406 | 0.09923 |
| 8777.244 | 0.08362 | 8989.974 | 0.08686 | 9563.214 | 0.09757 |          |         | 9559.44  | 0.09909 |
| 8777.19  | 0.08542 | 8989.626 | 0.08723 |          |         |          |         | 9559.47  | 0.09967 |
| 8882.07  | 0.08602 | 8988.738 | 0.08729 |          |         |          |         | 9559.71  | 0.09985 |
| 8989.41  | 0.08671 | 8988.954 | 0.08753 |          |         |          |         |          |         |
| 8988.198 | 0.08652 | 8988.012 | 0.08798 |          |         |          |         |          |         |
| 8988.066 | 0.08634 | 9100.038 | 0.08833 |          |         |          |         |          |         |
| 8988.252 | 0.08779 | 9098.85  | 0.08895 |          |         |          |         |          |         |
| 9099.234 | 0.08884 | 9100.2   | 0.09052 |          |         |          |         |          |         |
| 8985.024 | 0.0889  | 9098.214 | 0.09433 |          |         |          |         |          |         |

|          |         |          |         |  |  |  |  |  |  |
|----------|---------|----------|---------|--|--|--|--|--|--|
| 9096.918 | 0.09006 | 9207.144 | 0.09662 |  |  |  |  |  |  |
| 9096.312 | 0.089   | 9441.414 | 0.09558 |  |  |  |  |  |  |
| 9210.846 | 0.09029 | 9440.526 | 0.09715 |  |  |  |  |  |  |
| 9209.292 | 0.09636 | 9440.55  | 0.09719 |  |  |  |  |  |  |
| 9319.404 | 0.09659 | 9439.128 | 0.0986  |  |  |  |  |  |  |
| 9316.452 | 0.09793 | 9561.39  | 0.09668 |  |  |  |  |  |  |
| 9437.67  | 0.09529 | 9561.144 | 0.09814 |  |  |  |  |  |  |
| 9437.256 | 0.0979  | 9561.219 | 0.0989  |  |  |  |  |  |  |
| 9434.466 | 0.0992  | 9561.294 | 0.0983  |  |  |  |  |  |  |
| 9558.312 | 0.0995  | 9561.6   | 0.09908 |  |  |  |  |  |  |
|          |         | 9561.69  | 0.09821 |  |  |  |  |  |  |

Data of Figure 11

| APC 8045     |           | APC 9045     |           | APC 1145     |           | APC 1245     |           |
|--------------|-----------|--------------|-----------|--------------|-----------|--------------|-----------|
| Speed(r/min) | Thrust(N) | Speed(r/min) | Thrust(N) | Speed(r/min) | Thrust(N) | Speed(r/min) | Thrust(N) |
| 1174.512     | -0.0785   | 2095.59      | -0.05788  | 1350.648     | -0.12056  | 1105.638     | -0.43103  |
| 2954.652     | -0.02262  | 2711.484     | 0.02203   | 1708.158     | -0.09752  | 1756.194     | -0.39426  |
| 3898.908     | 0.13083   | 3026.028     | 0.0735    | 2085.69      | -0.09311  | 1926.462     | -0.32023  |
| 4556.55      | 0.21123   | 3260.79      | 0.10096   | 2267.352     | -0.09164  | 2170.008     | -0.30307  |
| 4848.762     | 0.25633   | 3392.346     | 0.11223   | 2412.192     | -0.09213  | 2316.45      | -0.25405  |
| 4976.256     | 0.28133   | 3518.568     | 0.15488   | 2533.632     | -0.05291  | 2443.926     | -0.19522  |
| 5110.926     | 0.30388   | 3602.322     | 0.18626   | 2649.174     | -0.06223  | 2508.87      | -0.1408   |
| 5216.502     | 0.34653   | 3672.318     | 0.20489   | 2715.906     | -0.05242  | 2577.354     | -0.09717  |
| 5252.718     | 0.34604   | 3708.402     | 0.22989   | 2765.64      | -0.0485   | 2631.18      | -0.06188  |
| 5364.45      | 0.37742   | 3801.498     | 0.30097   | 2796.432     | -0.05046  | 2659.014     | -0.05844  |
| 5441.37      | 0.38918   | 3919.578     | 0.30833   | 2827.812     | -0.0436   | 2716.344     | -0.0457   |
| 5481.006     | 0.39948   | 4045.47      | 0.34166   | 2838.516     | -0.03722  | 2756.028     | -0.00697  |
| 5521.05      | 0.41762   | 4089.21      | 0.37108   | 2881.764     | -0.02987  | 2766.066     | 0.00431   |
| 5561.682     | 0.42791   | 4111.344     | 0.36961   | 2892.858     | -0.04703  | 2807.28      | 0.00872   |
| 5561.562     | 0.4235    | 4133.892     | 0.39559   | 2892.87      | -0.03232  | 2828.28      | 0.00186   |
| 5561.496     | 0.42889   | 4156.626     | 0.41765   | 2926.482     | -0.03085  | 2828.316     | -5.95E-04 |
| 5644.74      | 0.45684   | 4226.268     | 0.43775   | 2915.256     | -0.01761  | 2849.676     | 0.00529   |
| 5730.528     | 0.46615   | 4250.046     | 0.44216   | 2926.518     | -0.01516  | 2860.398     | 0.01215   |
| 5729.994     | 0.46958   | 4298.274     | 0.4554    | 2915.238     | -0.02055  | 2893.272     | 0.04009   |
| 5773.992     | 0.48037   | 4372.83      | 0.48775   | 2903.964     | -0.00536  | 2984.796     | 0.09696   |
| 5818.398     | 0.47939   | 4398.3       | 0.48334   | 2909.58      | -0.01222  | 3032.79      | 0.11902   |
| 5863.29      | 0.48429   | 4398.144     | 0.47305   | 2915.196     | -0.00487  | 3082.266     | 0.13667   |
| 5863.212     | 0.50978   | 4398.192     | 0.50687   | 2960.952     | 0.0118    | 3094.926     | 0.18275   |
| 5863.476     | 0.52841   | 4449.954     | 0.50785   | 2960.964     | -0.00683  | 3133.404     | 0.19305   |
| 6051.132     | 0.60734   | 4476.336     | 0.53629   | 2996.148     | 0.01866   | 3159.666     | 0.22001   |
| 6199.86      | 0.70098   | 4476.21      | 0.53286   | 3032.316     | 0.00641   | 3227.154     | 0.26855   |
| 6303.366     | 0.69804   | 4503.06      | 0.54609   | 3076.152     | 0.00102   | 3297.588     | 0.28865   |
| 6356.388     | 0.69706   | 4529.982     | 0.56717   | 3119.988     | 0.05102   | 3341.448     | 0.32296   |
| 6409.83      | 0.69313   | 4584.894     | 0.59512   | 3185.838     | 0.08436   | 3371.208     | 0.37052   |
| 6464.586     | 0.68235   | 4612.818     | 0.6108    | 3212.916     | 0.08926   | 3386.34      | 0.38669   |
| 6520.902     | 0.70147   | 4612.866     | 0.62551   | 3240.564     | 0.07651   | 3401.628     | 0.39111   |
| 6693.846     | 0.78236   | 4669.704     | 0.61669   | 3240.504     | 0.09269   | 3417.012     | 0.42886   |
| 6876.852     | 0.83972   | 4787.982     | 0.66277   | 3254.49      | 0.09318   | 3480.03      | 0.52004   |
| 6939.642     | 0.88237   | 4866.228     | 0.70836   | 3268.578     | 0.09465   | 3528.744     | 0.58475   |



|          |         |          |         |          |         |          |         |
|----------|---------|----------|---------|----------|---------|----------|---------|
| 7004.19  | 0.92551 | 4944.474 | 0.79023 | 3297.234 | 0.08828 | 3578.952 | 0.62348 |
| 7002.03  | 0.9407  | 4944.3   | 0.80886 | 3355.776 | 0.09367 | 3596.016 | 0.62299 |
| 7068.552 | 0.98238 | 5043.396 | 0.89318 | 3416.58  | 0.09122 | 3613.254 | 0.68525 |
| 7271.598 | 0.9809  | 5146.404 | 1.03437 | 3495.66  | 0.12112 | 3648     | 0.74163 |
| 7489.104 | 1.05346 | 5181.582 | 1.07408 | 3561.606 | 0.1623  | 3701.742 | 0.82154 |
| 7563.684 | 1.07748 | 5181.492 | 1.14811 | 3595.59  | 0.19417 | 3880.866 | 1.08578 |
| 7641.09  | 1.12209 | 5327.706 | 1.35303 | 3630.144 | 0.2079  | 4059.99  | 1.26275 |
| 7639.614 | 1.13925 | 5365.188 | 1.4751  | 3665.34  | 0.23045 | 4126.59  | 1.31374 |
| 7640.256 | 1.13778 | 5521.812 | 1.83199 | 3701.412 | 0.23976 | 4172.226 | 1.3809  |
| 7640.256 | 1.14513 | 5687.886 | 1.79817 | 3756.576 | 0.2579  | 4242.486 | 1.54415 |
| 7640.004 | 1.15788 | 5819.682 | 2.108   | 3832.926 | 0.30791 | 4290.72  | 1.68485 |
| 7640.118 | 1.16818 | 5819.298 | 2.0026  | 3892.062 | 0.45106 | 4315.188 | 1.75054 |
| 7719.348 | 1.16523 | 5864.448 | 1.94279 | 3995.166 | 0.61284 | 4365.12  | 1.77554 |
| 7799.214 | 1.22308 | 5819.298 | 2.09574 | 4081.494 | 0.8609  | 4390.542 | 1.84908 |
| 7879.746 | 1.30201 | 5864.976 | 2.11535 | 4241.946 | 1.14916 | 4416.024 | 1.88928 |
| 7878.174 | 1.32554 | 5819.268 | 1.94279 | 4339.518 | 1.2928  | 4442.112 | 1.93634 |
| 7961.7   | 1.33731 | 5864.622 | 2.04525 | 4441.758 | 1.43105 | 4494.858 | 2.00988 |
| 7961.34  | 1.37016 | 5910.246 | 2.1482  | 4494.534 | 1.46585 | 4576.794 | 2.07753 |
| 7961.274 | 1.3677  | 5910.564 | 2.2031  | 4521.24  | 1.4634  | 4632.87  | 2.17019 |
| 8048.658 | 1.36574 | 5910.408 | 2.24036 | 4548.546 | 1.4938  | 4661.394 | 2.24716 |
| 7960.476 | 1.39173 | 5956.728 | 2.37077 | 4604.208 | 1.54037 | 4690.59  | 2.31138 |
| 8046.456 | 1.41771 | 6052.182 | 2.46097 | 4632.438 | 1.62763 | 4690.404 | 2.33393 |
| 8134.404 | 1.41232 | 6051.936 | 2.5095  | 4660.962 | 1.69921 | 4690.41  | 2.36824 |
| 8133.408 | 1.41232 | 6150.576 | 2.60265 | 4689.984 | 1.74921 | 4719.816 | 2.46237 |
| 8132.592 | 1.44124 | 6151.134 | 2.84091 | 4719.294 | 1.7747  | 4749.438 | 2.58248 |
| 8221.86  | 1.44271 | 6150.288 | 3.05416 | 4719.366 | 1.74872 | 4809.996 | 2.65454 |
| 8312.094 | 1.48634 | 6201.024 | 2.79531 | 4719.234 | 1.76343 | 4840.692 | 2.69474 |
| 8404.776 | 1.5535  | 6252.126 | 4.03905 | 4809.45  | 1.73745 | 4871.916 | 2.74328 |
| 8403.834 | 1.5535  | 6411.048 | 4.34741 | 4840.35  | 1.78157 | 4935.864 | 2.89966 |
| 8403.15  | 1.6138  | 6465.642 | 4.79353 | 4871.568 | 1.835   | 5001.324 | 2.98938 |
| 8403.03  | 1.61184 | 6521.496 | 5.08768 | 4935.15  | 1.95609 | 5034.42  | 3.13792 |
| 8499.834 | 1.63488 | 6521.724 | 5.25534 | 5034.066 | 2.00904 | 5102.664 | 3.27225 |
| 8496.948 | 1.71381 | 6521.76  | 5.31662 | 5000.55  | 2.01884 | 5102.328 | 3.34578 |
| 8593.38  | 1.77264 | 6521.796 | 5.2725  | 5034.072 | 2.03992 | 5136.996 | 3.42128 |
| 8692.752 | 1.82902 | 6521.61  | 5.19406 | 5101.986 | 2.13111 | 5244.162 | 3.67277 |
| 8691.372 | 1.85304 | 6521.526 | 5.06807 | 5171.94  | 2.27034 | 5317.998 | 3.92476 |
| 8795.28  | 1.86383 | 6521.568 | 5.02296 | 5207.382 | 2.42819 | 5472.198 | 4.22625 |

|           |         |          |         |          |         |          |         |
|-----------|---------|----------|---------|----------|---------|----------|---------|
| 8900.784  | 1.90108 | 6578.916 | 4.9911  | 5317.662 | 2.68949 | 5511.756 | 4.59001 |
| 8898.804  | 1.94325 | 6521.538 | 5.08817 | 5432.28  | 2.95226 | 5594.196 | 4.98564 |
| 9004.68   | 2.02119 | 6521.202 | 5.12788 | 5471.526 | 3.37338 | 5635.536 | 5.30968 |
| 9112.17   | 2.19768 | 6578.514 | 5.18376 | 5552.286 | 3.83763 | 5677.794 | 5.62932 |
| 9336.978  | 2.30014 | 6578.616 | 5.22298 | 5593.194 | 4.02834 | 5720.724 | 5.75139 |
| 9577.872  | 2.3977  | 6578.286 | 5.3024  | 5593.572 | 4.09403 | 5764.644 | 5.95386 |
| 9451.59   | 2.4379  | 6578.556 | 5.33672 | 5634.996 | 4.60045 | 5809.11  | 5.9014  |
| 9574.446  | 2.49526 | 6578.502 | 5.34015 | 5764.008 | 4.82008 | 5764.344 | 5.98131 |
| 9701.106  | 2.56193 | 6636.138 | 5.28818 | 5853.522 | 5.1049  | 5764.362 | 6.04603 |
| 9700.542  | 2.5786  | 6695.25  | 5.32642 | 5945.88  | 5.43435 | 5809.104 | 6.01269 |
| 9699.726  | 2.6286  | 6635.712 | 5.50193 | 5992.488 | 5.60789 | 5854.254 | 6.14407 |
| 9699.948  | 2.62272 | 6635.736 | 5.64116 | 6040.884 | 5.68339 | 5853.672 | 6.44312 |
| 9699.132  | 2.65654 | 6635.76  | 5.71911 | 6040.788 | 5.70643 | 5945.928 | 6.59853 |
| 9698.508  | 2.68302 | 6635.598 | 5.74362 | 6089.85  | 5.72849 | 5993.334 | 6.6299  |
| 9697.128  | 2.74675 | 6694.71  | 5.76421 | 6040.518 | 5.69809 | 5993.118 | 6.65588 |
| 9695.844  | 2.77273 | 6754.704 | 5.17494 | 6040.518 | 5.68976 | 6041.334 | 6.71814 |
| 9825.534  | 2.86196 | 6754.26  | 5.24112 | 6089.922 | 5.67407 | 6041.202 | 6.83776 |
| 9823.794  | 2.90804 | 6753.972 | 6.24955 | 6089.892 | 5.64956 | 6090.306 | 6.89463 |
| 9822.282  | 2.94481 | 6815.688 | 5.67204 | 6089.862 | 5.68584 | 6041.07  | 6.95199 |
| 9953.682  | 3.08894 | 6784.929 | 4.96561 | 6089.838 | 5.70839 | 6040.824 | 7.07259 |
| 10085.862 | 3.17522 | 6754.17  | 6.17307 | 6089.502 | 5.83732 | 6139.668 | 7.29025 |
| 10224.984 | 3.27621 | 6877.578 | 5.71028 | 6089.208 | 5.83536 | 6189.612 | 7.55057 |
| 10221.324 | 3.36102 | 6940.848 | 5.8902  | 6139.566 | 5.89027 | 6346.128 | 7.97071 |
| 10219.794 | 3.4174  | 7005.108 | 5.36368 | 6138.984 | 5.91135 | 6345.03  | 7.98345 |
| 10362.444 | 3.47819 | 7004.814 | 6.0961  | 6241.278 | 6.20893 | 6399.618 | 8.07611 |
| 10360.62  | 3.53996 | 7004.598 | 5.74019 | 6240.822 | 6.30501 | 6399.576 | 8.17857 |
| 10506.264 | 3.6282  | 7004.388 | 5.35437 | 6240.222 | 6.17853 | 6454.692 | 8.35113 |
| 10652.424 | 3.86106 | 7004.682 | 6.03139 | 6240.156 | 6.42806 | 6509.808 | 8.50703 |
| 10806.564 | 4.00765 | 7004.664 | 5.88088 | 6292.752 | 6.17853 | 6566.46  | 8.67175 |
| 10964.634 | 4.25424 | 7070.07  | 5.5789  | 6292.446 | 6.48346 | 6566.439 | 9.20023 |
| 10961.148 | 4.35768 | 7136.076 | 5.59851 | 6239.886 | 6.23197 | 6566.418 | 9.22327 |
| 11124.54  | 4.5827  | 7136.976 | 5.60733 | 6292.146 | 6.71485 | 6566.106 | 9.26788 |
| 11121.576 | 4.64055 | 7205.01  | 5.63871 | 6399.834 | 6.56043 | 6624.888 | 9.25955 |
| 11293.482 | 4.7582  | 7205.028 | 5.67057 | 6454.722 | 6.66142 | 6565.83  | 9.26249 |
| 11292.756 | 4.78517 | 7204.506 | 5.74607 | 6398.856 | 6.82957 | 6624.27  | 9.2973  |
| 11293.44  | 4.844   | 7344.588 | 5.5333  | 6398.922 | 6.71632 | 6624.156 | 9.29337 |
| 11293.014 | 4.90135 | 7489.494 | 6.02747 | 6398.892 | 7.01831 | 6624.156 | 9.29288 |

|           |         |          |         |          |          |          |          |
|-----------|---------|----------|---------|----------|----------|----------|----------|
| 11206.077 | 4.93763 | 7642.26  | 5.8     | 6398.622 | 7.32324  | 6624.126 | 9.27671  |
| 11119.14  | 4.99058 | 7641.66  | 5.89755 | 6454.29  | 7.11587  | 6624.228 | 9.30661  |
| 11466.924 | 5.07343 | 7640.706 | 6.14807 | 6453.276 | 6.90114  | 6623.526 | 9.36397  |
| 11465.478 | 5.13814 | 7718.61  | 6.18483 | 6452.904 | 7.02076  | 6682.794 | 9.42623  |
| 11287.404 | 5.15873 | 7799.136 | 6.18728 | 6623.19  | 7.16342  | 6682.212 | 9.37328  |
| 11285.028 | 5.26021 | 7798.464 | 6.18728 | 6682.17  | 7.36638  | 6742.116 | 9.29632  |
| 11460.18  | 5.30776 | 7798.368 | 6.2064  | 6681.204 | 7.5213   | 6803.646 | 9.53261  |
| 11460.27  | 5.34551 | 7881.69  | 6.20689 | 6741.738 | 7.38795  | 6803.154 | 9.53899  |
| 11459.874 | 5.38522 | 7799.094 | 6.23484 | 6866.028 | 7.64239  | 6803.076 | 9.24925  |
| 11460.444 | 5.38473 | 7881.942 | 6.24317 | 6927.576 | 8.67287  | 6803.094 | 9.60566  |
| 11459.916 | 5.44013 | 7881.132 | 6.3471  | 6991.686 | 8.71013  | 6802.644 | 9.63115  |
| 11644.2   | 5.43523 | 7880.448 | 6.43976 | 6990.66  | 8.7317   | 6865.14  | 9.69488  |
| 11460.222 | 5.48131 | 7879.941 | 6.40593 | 7057.746 | 9.05232  | 6927.636 | 10.2817  |
| 11459.526 | 5.46611 | 7879.434 | 6.34759 | 6990.348 | 9.05183  | 6991.704 | 10.44887 |
| 11459.832 | 5.50386 | 7880.094 | 6.29563 | 7057.08  | 8.99055  | 7057.596 | 10.30572 |
| 11460.048 | 5.49552 | 7879.23  | 6.3672  | 7056.198 | 9.05085  | 6990.84  | 10.45769 |
| 11459.742 | 5.52298 | 7879.632 | 6.44172 | 7055.85  | 9.2489   | 6991.524 | 10.65575 |
| 11460.138 | 5.50925 | 7880.034 | 6.41868 | 7123.626 | 9.52736  | 7056.684 | 10.94646 |
| 11460.444 | 5.51366 | 7964.682 | 6.4123  | 7191.246 | 9.81611  | 7191.918 | 11.26806 |
| 11460.528 | 5.51464 | 7963.242 | 6.38828 | 7190.364 | 9.89259  | 7261.476 | 11.39896 |
| 11460.222 | 5.50386 | 8049.24  | 6.80646 | 7260.738 | 10.01221 | 7260.51  | 11.44259 |
| 11643.75  | 5.52347 | 8135.106 | 6.75302 | 7331.592 | 10.23576 | 7332.9   | 11.44406 |
| 11460.138 | 5.48768 | 8133.522 | 7.03785 | 7330.896 | 10.55    | 7332.078 | 11.53132 |
| 11459.874 | 5.53769 | 8314.326 | 6.89911 | 7403.64  | 10.67256 | 7259.508 | 11.68231 |
| 11823.03  | 5.82987 | 8406.396 | 6.9251  | 7403.55  | 10.5549  | 7331.094 | 11.83184 |
| 12005.232 | 6.0897  | 8404.68  | 6.99471 | 7402.146 | 11.06377 | 7404.318 | 11.77791 |
| 12002.256 | 6.2402  | 8500.248 | 7.0756  | 7551.312 | 11.16966 | 7403.772 | 11.7132  |
| 11999.616 | 6.33285 | 8498.802 | 7.12119 | 7626.852 | 11.63931 | 7330.428 | 11.87106 |
| 12201.468 | 6.38384 | 8498.268 | 7.12462 | 7706.454 | 11.59617 | 7404.132 | 11.8838  |
| 12199.536 | 6.4814  | 8498.268 | 7.00304 | 7705.623 | 11.49077 | 7330.086 | 11.75928 |
| 12402.432 | 6.66965 | 8598.282 | 7.01481 | 7704.792 | 11.67608 | 7330.428 | 11.76369 |
| 12400.386 | 6.82604 | 8597.022 | 7.53005 | 7704.318 | 11.93591 | 7403.184 | 12.04215 |
| 12399.156 | 6.94075 | 8794.2   | 7.83694 | 7783.596 | 12.06484 | 7329.21  | 11.97352 |
| 12399.768 | 7.00154 | 9007.818 | 7.9747  | 7866.048 | 12.13544 | 7401.594 | 12.38385 |
| 12400.638 | 7.07018 | 9005.898 | 8.04088 | 7865.922 | 12.19328 | 7549.56  | 12.6373  |
| 12400.386 | 7.12949 | 9117.042 | 8.11589 | 7865.388 | 12.19083 | 7626.522 | 12.85938 |
| 12399.87  | 7.16332 | 9115.854 | 8.08942 | 7865.448 | 12.21437 | 7705.464 | 12.91233 |

|           |          |          |         |          |          |          |          |
|-----------|----------|----------|---------|----------|----------|----------|----------|
| 12400.026 | 7.17018  | 9116.022 | 8.10657 | 7865.202 | 12.20113 | 7705.842 | 12.92115 |
| 12400.176 | 7.22754  | 9004.008 | 8.09726 | 7865.448 | 12.14328 | 7704.636 | 13.16774 |
| 12397.77  | 7.24911  | 9116.13  | 8.19188 | 7865.43  | 12.14818 | 7866.48  | 13.37511 |
| 12613.416 | 7.31481  | 9114.882 | 8.33552 | 7864.914 | 12.1977  | 7864.686 | 13.40992 |
| 12604.302 | 7.57022  | 9114.138 | 8.29287 | 7948.494 | 12.66146 | 7949.862 | 13.4261  |
| 12822.048 | 7.78887  | 9113.97  | 8.2409  | 8118.462 | 13.17867 | 7863.984 | 13.54817 |
| 13048.752 | 7.88544  | 9113.862 | 8.31591 | 8207.778 | 13.28554 | 7949.274 | 13.63102 |
| 13046.256 | 7.94084  | 9113.64  | 8.44435 | 8207.622 | 13.1669  | 7948.218 | 13.71534 |
| 12817.338 | 7.98545  | 9228.33  | 8.39827 | 8207.778 | 13.36937 | 8034.6   | 13.7124  |
| 13044.558 | 8.04036  | 9227.022 | 8.32326 | 8206.296 | 13.47673 | 7946.85  | 13.86143 |
| 13044.78  | 8.11929  | 9227.814 | 8.51494 | 8298.342 | 13.43604 | 8033.076 | 13.90261 |
| 13039.962 | 8.22077  | 9225.09  | 8.50122 | 8297.448 | 13.55321 | 8121.126 | 14.14528 |
| 13276.392 | 8.26097  | 9223.728 | 8.56838 | 8294.742 | 13.75666 | 8209.71  | 14.32765 |
| 13037.076 | 8.27666  | 9224.016 | 8.61348 | 8389.194 | 13.84294 | 8300.202 | 14.65856 |
| 13039.626 | 8.31293  | 9223.02  | 8.6326  | 8485.842 | 13.89295 | 8298.318 | 14.70415 |
| 13276.566 | 8.34725  | 9222.822 | 8.69437 | 8387.832 | 13.95864 | 8297.976 | 14.71886 |
| 13274.16  | 8.44971  | 9339.072 | 8.87331 | 8483.562 | 14.06747 | 8297.538 | 14.68405 |
| 13270.224 | 8.63012  | 9458.472 | 8.77428 | 8581.896 | 14.18856 | 8297.472 | 14.81985 |
| 13513.998 | 8.74631  | 9458.946 | 8.90861 | 8579.862 | 14.19641 | 8295.702 | 14.91349 |
| 13268.64  | 8.77327  | 9457.248 | 8.97136 | 8579.736 | 14.31504 | 8389.59  | 15.30176 |
| 13270.05  | 8.81053  | 9336.516 | 8.86203 | 8681.16  | 14.3974  | 8482.602 | 15.45863 |
| 13269.402 | 8.85465  | 9456.174 | 8.91057 | 8680.806 | 14.40084 | 8580.84  | 15.45667 |
| 13268.874 | 8.8973   | 9457.488 | 8.96547 | 8780.61  | 14.81215 | 8580.696 | 15.45275 |
| 13266.588 | 9.03212  | 9335.7   | 9.02136 | 8778.192 | 14.76753 | 8580.768 | 15.50472 |
| 13508.1   | 9.28508  | 9454.836 | 9.12431 | 8777.808 | 14.80136 | 8580.624 | 15.50226 |
| 13758.126 | 9.43558  | 9577.686 | 9.21942 | 8883.834 | 14.93029 | 8579.91  | 15.51207 |
| 13756.986 | 9.50422  | 9574.662 | 9.31698 | 8777.142 | 14.89353 | 8579.52  | 15.60178 |
| 13505.604 | 9.52285  | 9574.446 | 9.36796 | 8777.19  | 14.78322 | 8579.196 | 15.60914 |
| 13504.026 | 9.60374  | 9700.578 | 9.38708 | 8777.244 | 14.90921 | 8579.736 | 15.56354 |
| 13503.966 | 9.64197  | 9699.228 | 9.39247 | 8777.19  | 15.03423 | 8579.37  | 15.63561 |
| 13504.692 | 9.68953  | 9699.324 | 9.39051 | 8882.07  | 15.12639 | 8578.98  | 15.63904 |
| 13755.918 | 9.75228  | 9697.848 | 9.50082 | 8989.41  | 15.24944 | 8679.252 | 15.86014 |
| 13752.762 | 9.83954  | 9697.062 | 9.66554 | 8988.198 | 15.26366 | 8677.014 | 15.98515 |
| 13751.628 | 9.89494  | 9825.078 | 9.58563 | 8988.066 | 15.20336 | 8676.012 | 16.09447 |
| 14012.01  | 9.95524  | 9822.408 | 9.80133 | 8988.252 | 15.26268 | 8780.556 | 16.09987 |
| 13746.774 | 9.98563  | 9822.408 | 9.69397 | 9099.234 | 15.41024 | 8780.454 | 16.22047 |
| 13747.656 | 10.00426 | 9956.688 | 9.8131  | 8985.024 | 15.44652 |          |          |

|           |          |           |          |          |          |  |  |
|-----------|----------|-----------|----------|----------|----------|--|--|
| 14013.582 | 10.02436 | 9956.16   | 9.75966  | 9096.918 | 15.48966 |  |  |
| 14010.834 | 10.04446 | 9954.576  | 10.03469 | 9096.312 | 15.45534 |  |  |
| 13748.604 | 10.0577  | 10088.478 | 10.16754 | 9210.846 | 15.57104 |  |  |
| 14012.73  | 10.09888 | 10086.342 | 10.11607 | 9209.292 | 16.08285 |  |  |
| 14010.246 | 10.118   | 10086.846 | 10.13225 | 9319.404 | 16.32846 |  |  |
| 14008.806 | 10.12388 | 10084.812 | 10.23569 | 9316.452 | 16.52112 |  |  |
| 14008.35  | 10.15379 | 10084.95  | 10.29304 | 9437.67  | 16.56132 |  |  |
| 14006.388 | 10.20624 | 10084.812 | 10.28765 | 9437.256 | 16.58878 |  |  |
| 14005.278 | 10.29988 | 10226.898 | 10.29746 | 9434.466 | 16.76968 |  |  |
| 14005.47  | 10.34547 | 10084.506 | 10.29599 | 9558.312 | 16.82017 |  |  |
| 14001.09  | 10.34253 | 10226.55  | 10.31609 |          |          |  |  |
| 14000.898 | 10.38028 | 10224.324 | 10.39943 |          |          |  |  |
| 14274.906 | 10.48274 | 10223.976 | 10.47541 |          |          |  |  |
| 14269.002 | 10.6803  | 10222.824 | 10.51267 |          |          |  |  |
| 14555.97  | 10.83522 | 10222.86  | 10.52983 |          |          |  |  |
| 14549.478 | 11.06563 | 10222.65  | 10.60043 |          |          |  |  |
| 14546.298 | 11.15535 | 10364.34  | 10.80535 |          |          |  |  |
| 14547.006 | 11.25535 | 10362.48  | 10.96761 |          |          |  |  |
| 14546.442 | 11.35242 | 10362.048 | 11.02546 |          |          |  |  |
| 14546.16  | 11.36909 | 10507.182 | 11.30294 |          |          |  |  |
| 14545.596 | 11.41762 | 10655.868 | 11.33824 |          |          |  |  |
| 14545.806 | 11.41174 | 10655.226 | 11.54414 |          |          |  |  |
| 14543.058 | 11.42057 | 10809.564 | 11.8074  |          |          |  |  |
| 14545.734 | 11.43282 | 10806.84  | 11.90937 |          |          |  |  |
| 14546.586 | 11.42645 | 10805.982 | 11.97212 |          |          |  |  |
| 14546.442 | 11.47253 | 10806.564 | 12.00055 |          |          |  |  |
| 14547.15  | 11.47498 | 10967.88  | 12.06673 |          |          |  |  |
| 14547.36  | 11.48283 | 10967.076 | 12.08291 |          |          |  |  |
| 14546.934 | 11.4789  | 10805.478 | 12.05595 |          |          |  |  |
| 14549.196 | 11.34948 | 10968     | 12.18341 |          |          |  |  |

Data of Figure 12

| APC 9045     |           | APC 9060     |           | APC 9075     |           |
|--------------|-----------|--------------|-----------|--------------|-----------|
| Speed(r/min) | Thrust(N) | Speed(r/min) | Thrust(N) | Speed(r/min) | Thrust(N) |
| 2095.59      | -0.05788  | 1731.306     | -0.10388  | 1870.776     | -0.2636   |
| 2711.484     | 0.02203   | 2159.22      | -4.40E-04 | 2220.804     | -0.14251  |
| 3026.028     | 0.0735    | 2763.84      | 0.06966   | 2782.128     | -0.07976  |
| 3260.79      | 0.10096   | 2980.596     | 0.10447   | 2966.904     | -0.07388  |
| 3392.346     | 0.11223   | 3166.884     | 0.10251   | 3138.564     | -0.0023   |
| 3518.568     | 0.15488   | 3262.074     | 0.19516   | 3218.388     | 0.00848   |
| 3602.322     | 0.18626   | 3408.336     | 0.23585   | 3316.836     | 0.03692   |
| 3672.318     | 0.20489   | 3518.814     | 0.24909   | 3421.338     | 0.08055   |
| 3708.402     | 0.22989   | 3585.18      | 0.2839    | 3516.354     | 0.11682   |
| 3801.498     | 0.30097   | 3725.766     | 0.29664   | 3651.63      | 0.18742   |
| 3919.578     | 0.30833   | 3838.728     | 0.37312   | 3797.766     | 0.27517   |
| 4045.47      | 0.34166   | 3958.584     | 0.43244   | 3894.948     | 0.30753   |
| 4089.21      | 0.37108   | 4086.246     | 0.47313   | 3955.872     | 0.35312   |
| 4111.344     | 0.36961   | 4245.996     | 0.54667   | 4018.692     | 0.36734   |
| 4133.892     | 0.39559   | 4418.82      | 0.64471   | 4061.682     | 0.40018   |
| 4156.626     | 0.41765   | 4691.586     | 0.82022   | 4173.222     | 0.43058   |
| 4226.268     | 0.43775   | 4903.5       | 0.88787   | 4315.68      | 0.49186   |
| 4250.046     | 0.44216   | 5170.362     | 1.07219   | 4494.27      | 0.54922   |
| 4298.274     | 0.4554    | 5278.17      | 1.28397   | 4659.774     | 0.63893   |
| 4372.83      | 0.48775   | 5352.51      | 1.42515   | 4807.23      | 0.77178   |
| 4398.3       | 0.48334   | 5352.576     | 1.52368   | 5030.172     | 1.0169    |
| 4398.144     | 0.47305   | 5352.462     | 1.65898   | 5097.414     | 1.17524   |
| 4398.192     | 0.50687   | 5352.486     | 1.77074   | 5202.444     | 1.3826    |
| 4449.954     | 0.50785   | 5390.466     | 1.90604   | 5238.234     | 1.47133   |
| 4476.336     | 0.53629   | 5468.166     | 2.08791   | 5202.138     | 1.55712   |
| 4476.21      | 0.53286   | 5547.894     | 2.33547   | 5238.072     | 1.72281   |
| 4503.06      | 0.54609   | 5630.04      | 2.73207   | 5238.054     | 1.77526   |
| 4529.982     | 0.56717   | 5714.7       | 2.95855   | 5238.228     | 1.80222   |
| 4584.894     | 0.59512   | 5846.766     | 3.28504   | 5274.588     | 1.93702   |
| 4612.818     | 0.6108    | 5846.472     | 3.49829   | 5274.57      | 2.14929   |
| 4612.866     | 0.62551   | 5984.706     | 3.64045   | 5348.892     | 2.35519   |
| 4669.704     | 0.61669   | 6080.58      | 3.73701   | 5425.248     | 2.48705   |
| 4787.982     | 0.66277   | 6229.908     | 4.17626   | 5464.302     | 2.65275   |
| 4866.228     | 0.70836   | 6281.304     | 4.27822   | 5503.8       | 2.80717   |
| 4944.474     | 0.79023   | 6333.882     | 4.50863   | 5544.006     | 3.12876   |
| 4944.3       | 0.80886   | 6333.792     | 4.90081   | 5626.398     | 3.48221   |
| 5043.396     | 0.89318   | 6552.324     | 4.91355   | 5797.944     | 3.90528   |
| 5146.404     | 1.03437   | 6609.282     | 4.98903   | 5887.758     | 4.02146   |
| 5181.582     | 1.07408   | 6667.212     | 4.9351    | 5933.766     | 4.23618   |
| 5181.492     | 1.14811   | 6726.168     | 4.99735   | 6028.032     | 4.42639   |
| 5327.706     | 1.35303   | 6786.18      | 5.13804   | 6027.9       | 4.52835   |
| 5365.188     | 1.4751    | 6847.422     | 5.37776   | 6028.164     | 4.61169   |
| 5521.812     | 1.83199   | 6847.656     | 5.41795   | 6076.158     | 4.76365   |
| 5687.886     | 1.79817   | 6847.236     | 5.71601   | 6175.14      | 4.86121   |
| 5819.682     | 2.108     | 6973.062     | 5.93759   | 6225.696     | 5.81275   |
| 5819.298     | 2.0026    | 7037.658     | 6.58224   | 6329.472     | 5.81422   |
| 5864.448     | 1.94279   | 7170.294     | 7.09698   | 6436.662     | 6.58634   |
| 5819.298     | 2.09574   | 7170.324     | 7.22445   | 6547.89      | 6.44907   |
| 5864.976     | 2.11535   | 7170.294     | 7.21856   | 6662.4       | 6.51818   |
| 5819.268     | 1.94279   | 7170.432     | 7.26122   | 6721.59      | 6.90596   |
| 5864.622     | 2.04525   | 7238.7       | 7.24112   | 6781.728     | 7.11724   |
| 5910.246     | 2.1482    | 7238.982     | 7.22347   | 6781.608     | 6.55836   |
| 5910.564     | 2.2031    | 7170.432     | 7.23621   | 6842.814     | 7.04909   |

|          |         |           |          |          |          |
|----------|---------|-----------|----------|----------|----------|
| 5910.408 | 2.24036 | 7238.736  | 7.22053  | 6842.55  | 7.09516  |
| 5956.728 | 2.37077 | 7170.444  | 7.21562  | 6842.412 | 6.91916  |
| 6052.182 | 2.46097 | 7204.494  | 7.21366  | 6904.758 | 7.30154  |
| 6051.936 | 2.5095  | 7238.544  | 7.20876  | 6904.68  | 7.04367  |
| 6150.576 | 2.60265 | 7308.198  | 7.29161  | 6904.884 | 7.37016  |
| 6151.134 | 2.84091 | 7308.324  | 7.45731  | 6904.998 | 7.44565  |
| 6150.288 | 3.05416 | 7379.112  | 7.28818  | 7032.726 | 7.62066  |
| 6201.024 | 2.79531 | 7451.586  | 7.43623  | 7098.576 | 7.90843  |
| 6252.126 | 4.03905 | 7525.344  | 7.55683  | 7165.77  | 8.01579  |
| 6411.048 | 4.34741 | 7600.596  | 7.76959  | 7165.242 | 8.20846  |
| 6465.642 | 4.79353 | 7600.308  | 7.80979  | 7303.374 | 8.39083  |
| 6521.496 | 5.08768 | 7755.708  | 8.00344  | 7374.198 | 8.69428  |
| 6521.724 | 5.25534 | 7835.454  | 8.35494  | 7374.45  | 8.74674  |
| 6521.76  | 5.31662 | 8085.924  | 8.79027  | 7446.402 | 8.52662  |
| 6521.796 | 5.2725  | 8261.484  | 8.92117  | 7520.364 | 8.95509  |
| 6521.61  | 5.19406 | 8352.15   | 8.96137  | 7595.436 | 9.02029  |
| 6521.526 | 5.06807 | 8445.33   | 9.04765  | 7750.296 | 9.21247  |
| 6521.568 | 5.02296 | 8445.114  | 9.16237  | 7750.056 | 9.42523  |
| 6578.916 | 4.9911  | 8540.1    | 9.1908   | 7911.954 | 9.50906  |
| 6521.538 | 5.08817 | 8492.463  | 9.24718  | 7911.582 | 9.6277   |
| 6521.202 | 5.12788 | 8444.826  | 9.26041  | 7995.096 | 10.01695 |
| 6578.514 | 5.18376 | 8540.172  | 9.20747  | 8080.458 | 9.91106  |
| 6578.616 | 5.22298 | 8540.562  | 9.19472  | 8167.2   | 10.27923 |
| 6578.286 | 5.3024  | 8540.316  | 9.29424  | 8167.152 | 10.24491 |
| 6578.556 | 5.33672 | 8637.42   | 9.40896  | 8166.954 | 10.10716 |
| 6578.502 | 5.34015 | 8637.366  | 9.39474  | 8255.934 | 10.27531 |
| 6636.138 | 5.28818 | 8637.168  | 9.55456  | 8166.888 | 10.24197 |
| 6695.25  | 5.32642 | 8736.678  | 9.51877  | 8256.024 | 10.09441 |
| 6635.712 | 5.50193 | 8736.348  | 9.61584  | 8256.048 | 10.10029 |
| 6635.736 | 5.64116 | 8838.396  | 9.68888  | 8255.982 | 10.13755 |
| 6635.76  | 5.71911 | 8837.826  | 9.83988  | 8346.804 | 10.10765 |
| 6635.598 | 5.74362 | 8941.986  | 10.09088 | 8255.55  | 10.05176 |
| 6694.71  | 5.76421 | 9157.65   | 10.31884 | 8346.876 | 10.08706 |
| 6754.704 | 5.17494 | 9157.176  | 10.4061  | 8346.732 | 10.14    |
| 6754.26  | 5.24112 | 9269.556  | 10.47033 | 8439.576 | 10.25864 |
| 6753.972 | 6.24955 | 9269.79   | 10.60955 | 8534.364 | 10.40767 |
| 6815.688 | 5.67204 | 9383.856  | 10.6272  | 8534.34  | 10.5822  |
| 6784.929 | 4.96561 | 9383.622  | 10.73309 | 8533.734 | 10.79153 |
| 6754.17  | 6.17307 | 9383.388  | 10.90713 | 8631.156 | 10.79839 |
| 6877.578 | 5.71028 | 9621.828  | 11.20912 | 8630.634 | 10.97341 |
| 6940.848 | 5.8902  | 9621.396  | 11.29883 | 8729.76  | 11.06018 |
| 7005.108 | 5.36368 | 9621.21   | 11.28265 | 8935.962 | 11.35923 |
| 7004.814 | 6.0961  | 9621.06   | 11.27922 | 8936.046 | 11.45728 |
| 7004.598 | 5.74019 | 9621.246  | 11.40423 | 8935.776 | 11.56072 |
| 7004.388 | 5.35437 | 9621.06   | 11.48218 | 9041.784 | 11.72446 |
| 7004.682 | 6.03139 | 9744.75   | 11.59739 | 9151.056 | 11.78672 |
| 7004.664 | 5.88088 | 9744.468  | 11.75426 | 9151.17  | 11.76319 |
| 7070.07  | 5.5789  | 9744.528  | 11.82535 | 9151.026 | 11.74015 |
| 7136.076 | 5.59851 | 9744.09   | 11.91997 | 9262.974 | 12.0436  |
| 7136.976 | 5.60733 | 9871.02   | 12.01164 | 9377.55  | 12.17058 |
| 7205.01  | 5.63871 | 9871.02   | 12.10037 | 9377.376 | 12.46227 |
| 7205.028 | 5.67057 | 10001.268 | 12.23127 | 9377.226 | 12.42991 |
| 7204.506 | 5.74607 | 10001.166 | 12.26313 | 9376.992 | 12.41226 |
| 7344.588 | 5.5333  | 10001.268 | 12.36069 | 9494.244 | 12.55247 |
| 7489.494 | 6.02747 | 10000.932 | 12.49306 | 9494.634 | 12.72308 |
| 7642.26  | 5.8     | 10134.828 | 12.59993 | 9615.444 | 12.82211 |

|          |         |           |          |           |          |
|----------|---------|-----------|----------|-----------|----------|
| 7641.66  | 5.89755 | 10134.69  | 12.64356 | 9494.184  | 12.83828 |
| 7640.706 | 6.14807 | 10134.348 | 12.71759 | 9614.646  | 12.90643 |
| 7718.61  | 6.18483 | 10134.384 | 12.7975  | 9614.766  | 12.95349 |
| 7799.136 | 6.18728 | 10134.108 | 12.84162 | 9614.49   | 13.09076 |
| 7798.464 | 6.18728 | 10133.832 | 12.90388 | 9737.286  | 13.4805  |
| 7798.368 | 6.2064  | 10271.616 | 13.0637  | 9864.234  | 13.63983 |
| 7881.69  | 6.20689 | 10412.544 | 13.41618 | 9993.672  | 13.97074 |
| 7799.094 | 6.23484 | 10411.314 | 13.66963 | 10127.952 | 14.04672 |
| 7881.942 | 6.24317 | 10706.832 | 13.89073 | 10127.508 | 14.03643 |
| 7881.132 | 6.3471  | 10705.986 | 13.95005 | 9993.636  | 14.02172 |
| 7880.448 | 6.43976 | 10556.244 | 13.96427 | 10127.916 | 14.08791 |
| 7879.941 | 6.40593 | 10705.914 | 13.99417 | 10127.472 | 14.14036 |
| 7879.434 | 6.34759 | 10706.064 | 14.09271 | 10127.508 | 14.22468 |
| 7880.094 | 6.29563 | 10706.22  | 14.01672 | 10127.508 | 14.24282 |
| 7879.23  | 6.3672  | 10556.394 | 14.06428 | 10127.508 | 14.2992  |
| 7879.632 | 6.44172 | 10705.95  | 14.20497 | 10126.926 | 14.34871 |
| 7880.034 | 6.41868 | 10705.644 | 14.21478 | 10127.298 | 14.36538 |
| 7964.682 | 6.4123  | 10555.8   | 14.2339  | 10264.728 | 14.34822 |
| 7963.242 | 6.38828 | 10705.8   | 14.28439 | 10264.584 | 14.39234 |
| 8049.24  | 6.80646 | 10859.61  | 14.32018 | 10127.508 | 14.36685 |
| 8135.106 | 6.75302 | 10705.38  | 14.31724 | 10264.866 | 14.45117 |
| 8133.522 | 7.03785 | 10704.996 | 14.31381 | 10263.882 | 14.75512 |
| 8314.326 | 6.89911 | 10858.59  | 14.37607 | 10549.824 | 15.12035 |
| 8406.396 | 6.9251  | 10859.256 | 14.34567 | 10549.638 | 15.10908 |
| 8404.68  | 6.99471 | 10858.392 | 14.5001  | 10549.374 | 15.39587 |
| 8500.248 | 7.0756  | 10858.626 | 14.60991 | 10699.152 | 15.42479 |
| 8498.802 | 7.12119 | 11016.696 | 14.71286 | 10698.084 | 15.5449  |
| 8498.268 | 7.12462 | 11016.816 | 14.77708 | 10697.664 | 15.67971 |
| 8498.268 | 7.00304 | 11016.372 | 14.96092 | 10697.742 | 15.69099 |
| 8598.282 | 7.01481 | 11016.048 | 15.21634 | 10698.084 | 15.7057  |
| 8597.022 | 7.53005 | 11177.808 | 15.26585 | 10697.82  | 15.69491 |
| 8794.2   | 7.83694 | 11177.97  | 15.4144  | 10697.97  | 15.72825 |
| 9007.818 | 7.9747  | 11178.138 | 15.51146 | 10697.97  | 15.80914 |
| 9005.898 | 8.04088 | 11345.37  | 15.62226 | 10697.706 | 15.82973 |
| 9117.042 | 8.11589 | 11345.76  | 15.72129 | 10697.898 | 15.81061 |
| 9115.854 | 8.08942 | 11345.412 | 15.73256 | 10851.282 | 15.85228 |
| 9116.022 | 8.10657 | 11177.472 | 15.70756 | 10851.324 | 16.08759 |
| 9004.008 | 8.09726 | 11177.556 | 15.73011 | 10850.814 | 16.32585 |
| 9116.13  | 8.19188 | 11345.628 | 15.75462 | 10850.418 | 16.41017 |
| 9114.882 | 8.33552 | 11344.77  | 15.79286 | 10850.736 | 16.39399 |
| 9114.138 | 8.29287 | 11345.37  | 15.74188 | 11008.608 | 16.63127 |
| 9113.97  | 8.2409  | 11177.682 | 15.7507  | 11007.924 | 16.70824 |
| 9113.862 | 8.31591 | 11344.86  | 15.82522 | 11007.924 | 16.92345 |
| 9113.64  | 8.44435 | 11344.86  | 15.88258 | 11007.642 | 16.88718 |
| 9228.33  | 8.39827 | 11176.806 | 15.91444 | 11170.566 | 17.0318  |
| 9227.022 | 8.32326 | 11345.46  | 15.95758 | 11170.398 | 16.94748 |
| 9227.814 | 8.51494 | 11345.286 | 16.03161 | 11170.104 | 17.17985 |
| 9225.09  | 8.50122 | 11344.602 | 16.02622 | 11169.858 | 17.27888 |
| 9223.728 | 8.56838 | 11344.428 | 16.16005 | 11169.024 | 17.25142 |
| 9224.016 | 8.61348 | 11517.462 | 16.31742 | 11336.754 | 17.24358 |
| 9223.02  | 8.6326  | 11517.198 | 16.30761 | 11337.354 | 17.32839 |
| 9222.822 | 8.69437 | 11516.844 | 16.33801 | 11169.942 | 17.32594 |
| 9339.072 | 8.87331 | 11517.156 | 16.33997 | 11337.354 | 17.39653 |
| 9458.472 | 8.77428 | 11517.288 | 16.35615 | 11337.18  | 17.44458 |
| 9458.946 | 8.90861 | 11516.622 | 16.72579 | 11336.796 | 17.59557 |
| 9457.248 | 8.97136 | 11694.222 | 16.87972 | 11509.2   | 17.6544  |



|           |          |           |          |           |          |
|-----------|----------|-----------|----------|-----------|----------|
| 9336.516  | 8.86203  | 11785.446 | 17.13661 | 11509.866 | 17.78579 |
| 9456.174  | 8.91057  | 11876.67  | 17.20132 | 11336.754 | 17.87452 |
| 9457.488  | 8.96547  | 11877     | 17.24593 | 11508.894 | 17.83187 |
| 9335.7    | 9.02136  | 11877     | 17.31114 | 11509.068 | 17.89511 |
| 9454.836  | 9.12431  | 11877.016 | 17.30819 | 11509.422 | 17.89413 |
| 9577.686  | 9.21942  | 11877.032 | 17.30427 | 11509.464 | 17.87746 |
| 9574.662  | 9.31698  | 11877.048 | 17.37291 | 11509.332 | 17.92648 |
| 9574.446  | 9.36796  | 11877.426 | 17.42046 | 11509.116 | 17.95835 |
| 9700.578  | 9.38708  | 11877.234 | 17.34251 | 11509.2   | 18.03434 |
| 9699.228  | 9.39247  | 11877.282 | 17.37536 | 11509.332 | 17.96668 |
| 9699.324  | 9.39051  | 11876.718 | 17.46262 | 11508.894 | 18.05002 |
| 9697.848  | 9.50082  | 11876.58  | 17.52684 | 11508.894 | 18.09562 |
| 9697.062  | 9.66554  | 11876.766 | 17.6396  | 11509.464 | 18.07552 |
| 9825.078  | 9.58563  | 11876.154 | 17.8352  | 11509.248 | 18.35593 |
| 9822.408  | 9.80133  | 12065.298 | 18.05924 | 11686.068 | 18.47604 |
| 9822.408  | 9.69397  | 12065.106 | 18.1867  | 11686.296 | 18.64616 |
| 9956.688  | 9.8131   | 12261.06  | 18.20778 | 11685.792 | 18.54174 |
| 9956.16   | 9.75966  | 12065.154 | 18.28328 | 11686.656 | 18.7192  |
| 9954.576  | 10.03469 | 12064.812 | 18.34946 |           |          |
| 10088.478 | 10.16754 | 12260.862 | 18.31171 |           |          |
| 10086.342 | 10.11607 | 12260.562 | 18.34211 |           |          |
| 10086.846 | 10.13225 | 12260.514 | 18.4127  |           |          |
| 10084.812 | 10.23569 | 12260.208 | 18.64361 |           |          |
| 10084.95  | 10.29304 | 12260.16  | 18.86618 |           |          |
| 10084.812 | 10.28765 | 12260.058 | 19.08482 |           |          |
| 10226.898 | 10.29746 | 12259.11  | 19.01472 |           |          |
| 10084.506 | 10.29599 | 12259.758 | 19.34563 |           |          |
| 10226.55  | 10.31609 | 12461.682 | 19.30249 |           |          |
| 10224.324 | 10.39943 | 12461.574 | 19.33828 |           |          |
| 10223.976 | 10.47541 |           |          |           |          |
| 10222.824 | 10.51267 |           |          |           |          |
| 10222.86  | 10.52983 |           |          |           |          |
| 10222.65  | 10.60043 |           |          |           |          |
| 10364.34  | 10.80535 |           |          |           |          |
| 10362.48  | 10.96761 |           |          |           |          |
| 10362.048 | 11.02546 |           |          |           |          |
| 10507.182 | 11.30294 |           |          |           |          |
| 10655.868 | 11.33824 |           |          |           |          |
| 10655.226 | 11.54414 |           |          |           |          |
| 10809.564 | 11.8074  |           |          |           |          |
| 10806.84  | 11.90937 |           |          |           |          |
| 10805.982 | 11.97212 |           |          |           |          |
| 10806.564 | 12.00055 |           |          |           |          |
| 10967.88  | 12.06673 |           |          |           |          |
| 10967.076 | 12.08291 |           |          |           |          |
| 10805.478 | 12.05595 |           |          |           |          |
| 10968     | 12.18341 |           |          |           |          |

Data of Figure 13

| APC 8045     |             | APC 9045     |             | APC 1145     |             | APC 1245     |             |
|--------------|-------------|--------------|-------------|--------------|-------------|--------------|-------------|
| Speed(r/min) | Torque(N·m) | Speed(r/min) | Torque(N·m) | Speed(r/min) | Torque(N·m) | Speed(r/min) | Torque(N·m) |
| 1454.088     | 0.00749     | 1334.22      | 0.00808     | 1350.648     | 0.01017     | 1105.638     | 0.01141     |
| 2625.366     | 0.00564     | 2401.59      | 0.00688     | 1708.158     | 0.00846     | 1756.194     | 0.01019     |
| 3163.752     | 0.00477     | 3001.956     | 0.0059      | 2085.69      | 0.00838     | 1926.462     | 0.00982     |
| 3600.432     | 0.00407     | 3205.59      | 0.00563     | 2267.352     | 0.00791     | 2170.008     | 0.00927     |
| 3857.742     | 0.00386     | 3347.268     | 0.00593     | 2412.192     | 0.00831     | 2316.45      | 0.00922     |
| 4065.06      | 0.00402     | 3486.198     | 0.00533     | 2533.632     | 0.00741     | 2443.926     | 0.00841     |
| 4200.534     | 0.00354     | 3568.386     | 0.00514     | 2649.174     | 0.00814     | 2508.87      | 0.00869     |
| 4296.198     | 0.0037      | 3585.294     | 0.00558     | 2715.906     | 0.008       | 2577.354     | 0.00821     |
| 4370.604     | 0.00402     | 3619.65      | 0.0057      | 2765.64      | 0.00786     | 2631.18      | 0.00853     |
| 4447.746     | 0.00373     | 3672.264     | 0.00568     | 2796.432     | 0.00817     | 2659.014     | 0.00871     |
| 4474.044     | 0.00423     | 3745.02      | 0.00565     | 2827.812     | 0.00842     | 2716.344     | 0.00926     |
| 4500.6       | 0.00416     | 3763.662     | 0.00574     | 2838.516     | 0.00831     | 2756.028     | 0.00855     |
| 4582.392     | 0.00476     | 3782.448     | 0.00583     | 2881.764     | 0.00828     | 2766.066     | 0.00926     |
| 4667.244     | 0.00463     | 3782.406     | 0.00554     | 2892.858     | 0.0089      | 2807.28      | 0.00917     |
| 4785.576     | 0.00523     | 3820.644     | 0.00688     | 2892.87      | 0.00838     | 2828.28      | 0.00859     |
| 4878.054     | 0.00543     | 3919.71      | 0.00807     | 2926.482     | 0.00808     | 2828.316     | 0.00938     |
| 4974.366     | 0.00469     | 4089.204     | 0.00761     | 2915.256     | 0.00833     | 2849.676     | 0.00934     |
| 5024.508     | 0.00504     | 4202.802     | 0.00831     | 2926.518     | 0.00798     | 2860.398     | 0.01035     |
| 5074.65      | 0.00573     | 4322.754     | 0.00923     | 2915.238     | 0.00796     | 2893.272     | 0.01109     |
| 5143.53      | 0.00479     | 4449.93      | 0.00789     | 2903.964     | 0.00786     | 2984.796     | 0.01164     |
| 5214.732     | 0.00543     | 4476.318     | 0.00927     | 2909.58      | 0.00879     | 3032.79      | 0.01159     |
| 5250.84      | 0.005       | 4557.216     | 0.00791     | 2915.196     | 0.00877     | 3082.266     | 0.01102     |
| 5287.416     | 0.00541     | 4530.036     | 0.00819     | 2960.952     | 0.00886     | 3094.926     | 0.01091     |
| 5324.85      | 0.00548     | 4502.856     | 0.0087      | 2960.964     | 0.00941     | 3133.404     | 0.01187     |
| 5362.62      | 0.00606     | 4584.924     | 0.00877     | 2996.148     | 0.00937     | 3159.666     | 0.01374     |
| 5439.75      | 0.00627     | 4641.162     | 0.01018     | 3032.316     | 0.00992     | 3227.154     | 0.01298     |
| 5519.352     | 0.00564     | 4757.796     | 0.0093      | 3076.152     | 0.01001     | 3297.588     | 0.01321     |
| 5518.944     | 0.00613     | 4787.934     | 0.00932     | 3119.988     | 0.01056     | 3341.448     | 0.0131      |
| 5559.84      | 0.00627     | 4818.54      | 0.00994     | 3185.838     | 0.01064     | 3371.208     | 0.01305     |
| 5600.892     | 0.00638     | 4880.7       | 0.00957     | 3212.916     | 0.01041     | 3386.34      | 0.01314     |
| 5685.51      | 0.0062      | 4944.342     | 0.01071     | 3240.564     | 0.01059     | 3401.628     | 0.01349     |
| 5685.072     | 0.00691     | 4977.006     | 0.01006     | 3240.504     | 0.01041     | 3417.012     | 0.0146      |
| 5771.874     | 0.00695     | 4976.988     | 0.00999     | 3254.49      | 0.01011     | 3480.03      | 0.01506     |
| 5861.4       | 0.008       | 5043.486     | 0.01211     | 3268.578     | 0.01149     | 3528.744     | 0.01487     |

|          |         |          |         |          |         |          |         |
|----------|---------|----------|---------|----------|---------|----------|---------|
| 6049.008 | 0.00788 | 5181.678 | 0.01108 | 3297.234 | 0.01181 | 3578.952 | 0.01469 |
| 6147.3   | 0.00763 | 5217.648 | 0.01071 | 3355.776 | 0.01218 | 3596.016 | 0.01513 |
| 6248.934 | 0.00763 | 5253.618 | 0.012   | 3416.58  | 0.01377 | 3613.254 | 0.01524 |
| 6248.61  | 0.00797 | 5290.35  | 0.01407 | 3495.66  | 0.01334 | 3648     | 0.01771 |
| 6301.134 | 0.00788 | 5562.486 | 0.01428 | 3561.606 | 0.01327 | 3701.742 | 0.02205 |
| 6353.832 | 0.00933 | 5730.93  | 0.01468 | 3595.59  | 0.01343 | 3880.866 | 0.02046 |
| 6462.3   | 0.01035 | 5864.382 | 0.01428 | 3630.144 | 0.01377 | 4059.99  | 0.02    |
| 6750.552 | 0.01072 | 5864.574 | 0.01329 | 3665.34  | 0.01364 | 4126.59  | 0.02087 |
| 7001.382 | 0.01118 | 5864.634 | 0.01283 | 3701.412 | 0.01483 | 4172.226 | 0.02186 |
| 7065.306 | 0.01148 | 5818.824 | 0.01414 | 3756.576 | 0.0152  | 4242.486 | 0.02168 |
| 7341.444 | 0.0112  | 5910.306 | 0.01566 | 3832.926 | 0.01613 | 4290.72  | 0.02166 |
| 7413.264 | 0.01143 | 6003.948 | 0.01516 | 3892.062 | 0.01721 | 4315.188 | 0.02173 |
| 7485.198 | 0.01143 | 6051.744 | 0.0147  | 3995.166 | 0.01862 | 4365.12  | 0.0227  |
| 7485.498 | 0.0116  | 6100.824 | 0.01541 | 4081.494 | 0.02    | 4390.542 | 0.02232 |
| 7560.96  | 0.01178 | 6100.614 | 0.01626 | 4241.946 | 0.02016 | 4416.024 | 0.02276 |
| 7559.82  | 0.01155 | 6201.228 | 0.01518 | 4339.518 | 0.02102 | 4442.112 | 0.02454 |
| 7637.982 | 0.01153 | 6200.832 | 0.01514 | 4441.758 | 0.02042 | 4494.858 | 0.02516 |
| 7637.262 | 0.01176 | 6200.706 | 0.01673 | 4494.534 | 0.02032 | 4576.794 | 0.0251  |
| 7636.194 | 0.01201 | 6200.358 | 0.01693 | 4521.24  | 0.02153 | 4632.87  | 0.02516 |
| 7715.91  | 0.01203 | 6410.898 | 0.01701 | 4548.546 | 0.02134 | 4661.394 | 0.02592 |
| 7796.016 | 0.01173 | 6521.586 | 0.01613 | 4604.208 | 0.02203 | 4690.59  | 0.02542 |
| 7714.86  | 0.0125  | 6521.226 | 0.01606 | 4632.438 | 0.02166 | 4690.404 | 0.02512 |
| 7877.592 | 0.01203 | 6520.914 | 0.01608 | 4660.962 | 0.02222 | 4690.41  | 0.02599 |
| 7794.66  | 0.0119  | 6578.574 | 0.01592 | 4689.984 | 0.02247 | 4719.816 | 0.02639 |
| 7878.216 | 0.01231 | 6578.112 | 0.01611 | 4719.294 | 0.02118 | 4749.438 | 0.02701 |
| 7794.354 | 0.0125  | 6578.442 | 0.0158  | 4719.366 | 0.02242 | 4809.996 | 0.02759 |
| 7875.978 | 0.01242 | 6578.226 | 0.01705 | 4719.234 | 0.02372 | 4840.692 | 0.02782 |
| 7960.872 | 0.01252 | 6635.904 | 0.01648 | 4809.45  | 0.02422 | 4871.916 | 0.02906 |
| 7874.616 | 0.01295 | 6635.817 | 0.01682 | 4840.35  | 0.02407 | 4935.864 | 0.0296  |
| 7958.808 | 0.01326 | 6635.73  | 0.01581 | 4871.568 | 0.02554 | 5001.324 | 0.0299  |
| 8132.508 | 0.01415 | 6635.262 | 0.01641 | 4935.15  | 0.02566 | 5034.42  | 0.0313  |
| 8219.448 | 0.0139  | 6694.83  | 0.01585 | 5034.066 | 0.02466 | 5102.664 | 0.03061 |
| 8309.994 | 0.01443 | 6694.578 | 0.01611 | 5000.55  | 0.02543 | 5102.328 | 0.03142 |
| 8309.418 | 0.01478 | 6724.512 | 0.02102 | 5034.072 | 0.02612 | 5136.996 | 0.03366 |
| 8402.022 | 0.01485 | 6754.446 | 0.01634 | 5101.986 | 0.0276  | 5244.162 | 0.03536 |
| 8399.148 | 0.01519 | 6754.032 | 0.01837 | 5171.94  | 0.0278  | 5317.998 | 0.03659 |
| 8593.92  | 0.01582 | 6815.517 | 0.0198  | 5207.382 | 0.02974 | 5472.198 | 0.03742 |

|           |         |          |         |          |         |          |         |
|-----------|---------|----------|---------|----------|---------|----------|---------|
| 8692.5    | 0.01559 | 6877.002 | 0.01846 | 5317.662 | 0.03066 | 5511.756 | 0.03681 |
| 8690.388  | 0.01573 | 6941.004 | 0.02155 | 5432.28  | 0.03083 | 5594.196 | 0.03839 |
| 8793.114  | 0.016   | 7005.006 | 0.01927 | 5471.526 | 0.0312  | 5635.536 | 0.03864 |
| 8791.572  | 0.01591 | 7070.034 | 0.02171 | 5552.286 | 0.03152 | 5677.794 | 0.04    |
| 8897.454  | 0.0164  | 7136.79  | 0.0206  | 5593.194 | 0.03006 | 5720.724 | 0.03951 |
| 8894.976  | 0.01655 | 7136.556 | 0.021   | 5593.572 | 0.03299 | 5764.644 | 0.0394  |
| 9002.874  | 0.01674 | 7204.956 | 0.02236 | 5634.996 | 0.03563 | 5809.11  | 0.03965 |
| 9000.9    | 0.01812 | 7274.088 | 0.02623 | 5764.008 | 0.03518 | 5764.344 | 0.03915 |
| 9220.302  | 0.01914 | 7489.44  | 0.02474 | 5853.522 | 0.03632 | 5764.362 | 0.03984 |
| 9451.884  | 0.01955 | 7720.182 | 0.02409 | 5945.88  | 0.03729 | 5809.104 | 0.04086 |
| 9570.936  | 0.01921 | 7641.192 | 0.02589 | 5992.488 | 0.0368  | 5854.254 | 0.04235 |
| 9695.562  | 0.01889 | 7640.838 | 0.02328 | 6040.884 | 0.0365  | 5853.672 | 0.04323 |
| 9695.592  | 0.01928 | 7640.976 | 0.0251  | 6040.788 | 0.03715 | 5945.928 | 0.04258 |
| 9694.524  | 0.01875 | 7719.306 | 0.02351 | 6089.85  | 0.03673 | 5993.334 | 0.04256 |
| 9696.498  | 0.01868 | 7718.988 | 0.02582 | 6040.518 | 0.0368  | 5993.118 | 0.04362 |
| 9696.75   | 0.01903 | 7718.352 | 0.02654 | 6040.518 | 0.03676 | 6041.334 | 0.04358 |
| 9695.28   | 0.01933 | 7800.372 | 0.02556 | 6089.922 | 0.03657 | 6041.202 | 0.04388 |
| 9694.242  | 0.01909 | 7718.868 | 0.02471 | 6089.892 | 0.03691 | 6090.306 | 0.04326 |
| 9694.272  | 0.01932 | 7799.784 | 0.02497 | 6089.862 | 0.03685 | 6041.07  | 0.04501 |
| 9694.368  | 0.01919 | 7799.178 | 0.02483 | 6089.838 | 0.03719 | 6040.824 | 0.04554 |
| 9694.026  | 0.0193  | 7800.168 | 0.02527 | 6089.502 | 0.03758 | 6139.668 | 0.04754 |
| 9693.492  | 0.019   | 7718.712 | 0.0251  | 6089.208 | 0.03724 | 6189.612 | 0.04987 |
| 9693.366  | 0.01889 | 7718.43  | 0.02593 | 6139.566 | 0.03825 | 6346.128 | 0.04965 |
| 9694.212  | 0.01893 | 7798.77  | 0.02623 | 6138.984 | 0.03908 | 6345.03  | 0.04987 |
| 9693.054  | 0.01941 | 7880.862 | 0.02633 | 6241.278 | 0.03957 | 6399.618 | 0.04928 |
| 9693.084  | 0.01958 | 7880.262 | 0.02637 | 6240.822 | 0.03962 | 6399.576 | 0.05038 |
| 9821.706  | 0.02015 | 7879.83  | 0.02644 | 6240.222 | 0.03961 | 6454.692 | 0.05345 |
| 9953.682  | 0.02041 | 7879.206 | 0.02697 | 6240.156 | 0.03959 | 6509.808 | 0.05265 |
| 9950.514  | 0.02068 | 7962.12  | 0.02792 | 6292.752 | 0.03976 | 6566.46  | 0.05251 |
| 9946.884  | 0.0211  | 8048.508 | 0.02746 | 6292.446 | 0.03927 | 6566.439 | 0.05228 |
| 10081.152 | 0.02225 | 8048.484 | 0.02734 | 6239.886 | 0.04146 | 6566.418 | 0.0528  |
| 10216.554 | 0.02239 | 8135.574 | 0.02992 | 6292.146 | 0.04142 | 6566.106 | 0.05251 |
| 10358.4   | 0.02189 | 8132.526 | 0.02937 | 6399.834 | 0.04156 | 6624.888 | 0.05347 |
| 10358.436 | 0.02226 | 8222.244 | 0.0281  | 6454.722 | 0.04125 | 6565.83  | 0.05318 |
| 10357.47  | 0.02285 | 8220.912 | 0.03011 | 6398.856 | 0.04142 | 6624.27  | 0.05297 |
| 10502.07  | 0.02435 | 8221.14  | 0.03064 | 6398.922 | 0.04128 | 6624.156 | 0.05281 |
| 10649.436 | 0.02451 | 8311.446 | 0.03131 | 6398.892 | 0.04038 | 6624.156 | 0.05285 |

|           |         |          |         |          |         |          |         |
|-----------|---------|----------|---------|----------|---------|----------|---------|
| 10804.584 | 0.02482 | 8499.714 | 0.032   | 6398.622 | 0.04186 | 6624.126 | 0.05325 |
| 10800.186 | 0.02578 | 8696.964 | 0.03443 | 6454.29  | 0.04209 | 6624.228 | 0.05336 |
| 10956.822 | 0.02579 | 8797.11  | 0.0338  | 6453.276 | 0.0431  | 6623.526 | 0.05452 |
| 10953.984 | 0.02652 | 8692.074 | 0.03159 | 6452.904 | 0.04554 | 6682.794 | 0.0552  |
| 11291.91  | 0.02588 | 8796.828 | 0.03457 | 6623.19  | 0.04548 | 6682.212 | 0.05599 |
| 11291.1   | 0.02692 | 8797.164 | 0.03304 | 6682.17  | 0.04478 | 6742.116 | 0.05618 |
| 11116.008 | 0.02676 | 8794.536 | 0.03313 | 6681.204 | 0.04548 | 6803.646 | 0.05638 |
| 11114.982 | 0.02682 | 8793.552 | 0.03516 | 6741.738 | 0.04776 | 6803.154 | 0.05602 |
| 11285.154 | 0.02735 | 8898.96  | 0.03498 | 6866.028 | 0.05011 | 6803.076 | 0.0567  |
| 11283.246 | 0.02759 | 9007.47  | 0.03558 | 6927.576 | 0.04921 | 6803.094 | 0.05722 |
| 11457.51  | 0.02828 | 9005.604 | 0.03491 | 6991.686 | 0.05007 | 6802.644 | 0.0579  |
| 11455.062 | 0.0277  | 9005.25  | 0.03484 | 6990.66  | 0.05124 | 6865.14  | 0.06074 |
| 11456.676 | 0.02818 | 9005.004 | 0.03519 | 7057.746 | 0.05002 | 6927.636 | 0.0606  |
| 11456.328 | 0.02796 | 9003.9   | 0.03503 | 6990.348 | 0.05108 | 6991.704 | 0.06075 |
| 11456.154 | 0.02763 | 9003.846 | 0.03586 | 7057.08  | 0.05064 | 7057.596 | 0.06031 |
| 11455.848 | 0.02807 | 9113.664 | 0.03738 | 7056.198 | 0.05178 | 6990.84  | 0.0606  |
| 11456.112 | 0.02825 | 9228.864 | 0.03733 | 7055.85  | 0.05152 | 6991.524 | 0.06224 |
| 11456.373 | 0.02796 | 9114.054 | 0.03517 | 7123.626 | 0.05297 | 7056.684 | 0.06538 |
| 11456.634 | 0.02814 | 9002.334 | 0.03495 | 7191.246 | 0.05424 | 7191.918 | 0.06573 |
| 11456.196 | 0.02795 | 9114.774 | 0.03544 | 7190.364 | 0.05365 | 7261.476 | 0.06547 |
| 11455.41  | 0.03167 | 9114.882 | 0.03664 | 7260.738 | 0.05429 | 7260.51  | 0.0649  |
| 12007.014 | 0.03148 | 9112.584 | 0.04084 | 7331.592 | 0.05584 | 7332.9   | 0.06557 |
| 12201.024 | 0.03195 | 9340.962 | 0.03643 | 7330.896 | 0.05457 | 7332.078 | 0.06714 |
| 12196.908 | 0.03238 | 9459.156 | 0.04116 | 7403.64  | 0.05729 | 7259.508 | 0.06637 |
| 12193.782 | 0.03181 | 9458.262 | 0.03911 | 7403.55  | 0.05653 | 7331.094 | 0.0672  |
| 12194.976 | 0.03229 | 9457.668 | 0.03705 | 7402.146 | 0.05925 | 7404.318 | 0.06718 |
| 12192.444 | 0.03213 | 9336.864 | 0.04151 | 7551.312 | 0.06227 | 7403.772 | 0.06713 |
| 12194.478 | 0.03148 | 9456.858 | 0.04035 | 7626.852 | 0.06082 | 7330.428 | 0.06617 |
| 12194.13  | 0.03278 | 9456.054 | 0.03657 | 7706.454 | 0.0605  | 7404.132 | 0.06737 |
| 12193.782 | 0.03204 | 9455.19  | 0.0401  | 7705.623 | 0.06084 | 7330.086 | 0.06677 |
| 12400.692 | 0.03291 | 9578.88  | 0.04045 | 7704.792 | 0.06373 | 7330.428 | 0.06873 |
| 12398.334 | 0.03255 | 9454.986 | 0.04268 | 7704.318 | 0.06373 | 7403.184 | 0.06663 |
| 12397.668 | 0.03432 | 9576.252 | 0.04114 | 7783.596 | 0.06437 | 7329.21  | 0.07058 |
| 12393.006 | 0.03534 | 9574.506 | 0.04017 | 7866.048 | 0.06447 | 7401.594 | 0.07359 |
| 12601.23  | 0.03525 | 9574.326 | 0.04077 | 7865.922 | 0.06393 | 7549.56  | 0.07457 |
| 12598.056 | 0.03534 | 9574.446 | 0.0407  | 7865.388 | 0.06378 | 7626.522 | 0.07387 |
| 12820.02  | 0.03515 | 9573.162 | 0.04043 | 7865.448 | 0.06389 | 7705.464 | 0.07424 |

|           |         |           |         |          |         |          |         |
|-----------|---------|-----------|---------|----------|---------|----------|---------|
| 12598.74  | 0.03547 | 9699.792  | 0.04031 | 7865.202 | 0.06433 | 7705.842 | 0.0748  |
| 12817.062 | 0.03592 | 9571.944  | 0.04142 | 7865.448 | 0.06447 | 7704.636 | 0.07854 |
| 12814.764 | 0.03626 | 9696.876  | 0.04465 | 7865.43  | 0.06504 | 7866.48  | 0.07996 |
| 12814.38  | 0.03587 | 9825.852  | 0.04379 | 7864.914 | 0.06603 | 7864.686 | 0.07888 |
| 12813.396 | 0.03629 | 9824.472  | 0.03976 | 7948.494 | 0.0709  | 7949.862 | 0.07904 |
| 12926.622 | 0.03633 | 9822.216  | 0.04799 | 8118.462 | 0.07118 | 7863.984 | 0.07936 |
| 13039.848 | 0.037   | 9954.312  | 0.04013 | 8207.778 | 0.06964 | 7949.274 | 0.07959 |
| 13039.17  | 0.03753 | 9953.88   | 0.04596 | 8207.622 | 0.07046 | 7948.218 | 0.08153 |
| 13035.486 | 0.03691 | 9954.144  | 0.04493 | 8207.778 | 0.07176 | 8034.6   | 0.08052 |
| 13035.768 | 0.03674 | 9950.382  | 0.04253 | 8206.296 | 0.0709  | 7946.85  | 0.08142 |
| 13036.278 | 0.03802 | 10087.32  | 0.04571 | 8298.342 | 0.07158 | 8033.076 | 0.08312 |
| 13272.75  | 0.0385  | 10086.984 | 0.04795 | 8297.448 | 0.0746  | 8121.126 | 0.08493 |
| 13030.674 | 0.03838 | 10087.422 | 0.04463 | 8294.742 | 0.07453 | 8209.71  | 0.08747 |
| 13029.6   | 0.0382  | 10087.152 | 0.04223 | 8389.194 | 0.07483 | 8300.202 | 0.08809 |
| 13266.822 | 0.03944 | 10087.305 | 0.04485 | 8485.842 | 0.07501 | 8298.318 | 0.08679 |
| 13263.714 | 0.04162 | 10087.458 | 0.0479  | 8387.832 | 0.07554 | 8297.976 | 0.08719 |
| 13502.502 | 0.04021 | 10085.184 | 0.04765 | 8483.562 | 0.07684 | 8297.538 | 0.08746 |
| 13500.864 | 0.0411  | 10084.608 | 0.04534 | 8581.896 | 0.07891 | 8297.472 | 0.08963 |
| 13499.832 | 0.04113 | 10085.118 | 0.04432 | 8579.862 | 0.07856 | 8295.702 | 0.09063 |
| 13497.402 | 0.04016 | 10084.422 | 0.04513 | 8579.736 | 0.07822 | 8389.59  | 0.09462 |
| 13752.888 | 0.04097 | 10083.726 | 0.04658 | 8681.16  | 0.07917 | 8482.602 | 0.09542 |
| 13499.226 | 0.04131 | 10222.926 | 0.05099 | 8680.806 | 0.08226 | 8580.84  | 0.09469 |
| 13498.614 | 0.04118 | 10362.408 | 0.04959 | 8780.61  | 0.08344 | 8580.696 | 0.09436 |
| 13496.31  | 0.04185 | 10508.91  | 0.04892 | 8778.192 | 0.08239 | 8580.768 | 0.09434 |
| 13748.1   | 0.0417  | 10658.37  | 0.05046 | 8777.808 | 0.08383 | 8580.624 | 0.09506 |
| 13747.53  | 0.0421  | 10654.962 | 0.05538 | 8883.834 | 0.08382 | 8579.91  | 0.09584 |
| 13747.53  | 0.04256 | 10653.486 | 0.05125 | 8777.142 | 0.08237 | 8579.52  | 0.09499 |
| 13743.312 | 0.04327 | 10653.294 | 0.04966 | 8777.19  | 0.08286 | 8579.196 | 0.09588 |
| 13744.002 | 0.04334 | 10653.714 | 0.04951 | 8777.244 | 0.08362 | 8579.736 | 0.09572 |
| 13740.354 | 0.04261 | 10811.784 | 0.05344 | 8777.19  | 0.08542 | 8579.37  | 0.09565 |
| 14005.536 | 0.0427  | 10652.196 | 0.05404 | 8882.07  | 0.08602 | 8578.98  | 0.09743 |
| 14003.574 | 0.0433  | 10652.616 | 0.0542  | 8989.41  | 0.08671 | 8679.252 | 0.09907 |
| 14003.904 | 0.04353 | 10808.748 | 0.05279 | 8988.198 | 0.08652 | 8677.014 | 0.09935 |
| 14003.316 | 0.04312 | 10808.046 | 0.05371 | 8988.066 | 0.08634 | 8676.012 | 0.09974 |
| 14000.964 | 0.04519 | 10804.386 | 0.05275 | 8988.252 | 0.08779 | 8780.556 | 0.09942 |
| 14000.178 | 0.04355 | 10967.88  | 0.05249 | 9099.234 | 0.08884 | 8780.454 | 0.0999  |
| 13998.48  | 0.04665 | 10965.396 | 0.05104 | 8985.024 | 0.0889  |          |         |

|           |         |           |         |          |         |  |  |
|-----------|---------|-----------|---------|----------|---------|--|--|
| 14265.132 | 0.04643 | 10964.634 | 0.05484 | 9096.918 | 0.09006 |  |  |
| 14545.524 | 0.04598 | 10802.556 | 0.05773 | 9096.312 | 0.089   |  |  |
| 14545.734 | 0.04635 | 10963.95  | 0.05404 | 9210.846 | 0.09029 |  |  |
| 14259.438 | 0.04607 | 10959.906 | 0.05319 | 9209.292 | 0.09636 |  |  |
| 14545.314 | 0.04662 | 11124.996 | 0.05828 | 9319.404 | 0.09659 |  |  |
| 14542.284 | 0.04671 | 11125.164 | 0.05288 | 9316.452 | 0.09793 |  |  |
| 14261.13  | 0.04694 | 11124.378 | 0.0575  | 9437.67  | 0.09529 |  |  |
| 14544.186 | 0.04731 | 11123.76  | 0.05732 | 9437.256 | 0.0979  |  |  |
| 14543.478 | 0.04697 | 11122.728 | 0.05049 | 9434.466 | 0.0992  |  |  |
| 14544.042 | 0.04653 | 11123.556 | 0.06168 | 9558.312 | 0.0995  |  |  |
| 14542.422 | 0.04607 | 11123.184 | 0.05108 |          |         |  |  |
| 14542.212 | 0.04743 | 11294.286 | 0.05741 |          |         |  |  |
| 14541.786 | 0.04838 | 11292.078 | 0.06135 |          |         |  |  |
| 14541.576 | 0.0471  | 11290.464 | 0.05752 |          |         |  |  |
| 14539.251 | 0.04658 | 11288.718 | 0.05683 |          |         |  |  |
| 14536.926 | 0.04978 | 11287.914 | 0.05662 |          |         |  |  |
| 14831.88  | 0.04704 | 11465.262 | 0.05644 |          |         |  |  |
| 14830.416 | 0.05084 | 11288.124 | 0.05724 |          |         |  |  |
| 14828.07  | 0.04604 | 11465.082 | 0.05773 |          |         |  |  |
| 14829.312 | 0.04988 | 11287.404 | 0.05752 |          |         |  |  |
| 14833.128 | 0.0478  | 11286.552 | 0.05939 |          |         |  |  |
| 14829.312 | 0.04815 | 11462.064 | 0.06077 |          |         |  |  |
| 14826.162 | 0.05209 | 11461.272 | 0.06094 |          |         |  |  |
| 14820.084 | 0.04995 | 11460.966 | 0.05815 |          |         |  |  |
| 15128.364 | 0.04992 | 11460.576 | 0.05588 |          |         |  |  |
| 15126.378 | 0.04999 | 11460.882 | 0.05616 |          |         |  |  |
| 15127.524 | 0.05013 | 11460.708 | 0.05736 |          |         |  |  |
| 14821.62  | 0.04976 | 11460.792 | 0.05951 |          |         |  |  |
| 15127.296 | 0.04943 | 11461.098 | 0.06156 |          |         |  |  |
| 15123.024 | 0.04994 | 11460.75  | 0.06008 |          |         |  |  |
| 15123.558 | 0.05142 | 11461.188 | 0.05946 |          |         |  |  |
| 15122.49  | 0.05278 | 11461.056 | 0.05819 |          |         |  |  |
| 15122.034 | 0.05041 | 11459.214 | 0.059   |          |         |  |  |
| 15122.034 | 0.04935 | 11735.397 | 0.06159 |          |         |  |  |
| 15122.112 | 0.05264 | 12011.58  | 0.06509 |          |         |  |  |
| 15122.952 | 0.0529  | 12010.374 | 0.06562 |          |         |  |  |
| 15436.308 | 0.05147 | 12009.702 | 0.06482 |          |         |  |  |

|           |         |           |         |  |  |  |  |
|-----------|---------|-----------|---------|--|--|--|--|
| 15432.972 | 0.05018 | 12008.91  | 0.06422 |  |  |  |  |
| 15432.732 | 0.05502 | 12008.118 | 0.06392 |  |  |  |  |
| 15427.578 | 0.05341 | 12008.742 | 0.06389 |  |  |  |  |
| 15430.35  | 0.05054 | 12007.542 | 0.06362 |  |  |  |  |
| 15426.306 | 0.05061 | 12008.742 | 0.06366 |  |  |  |  |
| 15432.18  | 0.0522  | 12006.63  | 0.06461 |  |  |  |  |
| 15761.106 | 0.05495 | 12005.424 | 0.06433 |  |  |  |  |
| 15756.384 | 0.0555  | 12004.848 | 0.0617  |  |  |  |  |
| 15755.31  | 0.0571  | 12003.072 | 0.06202 |  |  |  |  |
| 15753.822 | 0.0559  | 12004.464 | 0.06625 |  |  |  |  |
| 15755.808 | 0.05384 | 12004.224 | 0.0682  |  |  |  |  |
| 15754.398 | 0.05341 | 12002.256 | 0.06834 |  |  |  |  |
| 15753.492 | 0.05536 | 12202.266 | 0.06094 |  |  |  |  |
| 15753.984 | 0.05687 | 12200.976 | 0.06835 |  |  |  |  |
| 15754.728 | 0.0559  | 12198.444 | 0.06977 |  |  |  |  |
| 15755.142 | 0.05315 | 12199.98  | 0.06115 |  |  |  |  |



Data of Figure 14

| APC 9045     |             | APC 9060     |             | APC 9075     |             |
|--------------|-------------|--------------|-------------|--------------|-------------|
| Speed(r/min) | Torque(N·m) | Speed(r/min) | Torque(N·m) | Speed(r/min) | Torque(N·m) |
| 1334.22      | 0.00808     | 2629.932     | 0.00835     | 973.806      | 0.01033     |
| 2401.59      | 0.00688     | 2957.406     | 0.00823     | 2092.458     | 0.00842     |
| 3001.956     | 0.0059      | 3262.074     | 0.00784     | 2515.086     | 0.00761     |
| 3205.59      | 0.00563     | 3454.824     | 0.00819     | 2762.022     | 0.00724     |
| 3347.268     | 0.00593     | 3551.55      | 0.00828     | 2990.418     | 0.00764     |
| 3486.198     | 0.00533     | 3707.622     | 0.00786     | 3075.132     | 0.00789     |
| 3568.386     | 0.00514     | 3781.41      | 0.00883     | 3204.798     | 0.00766     |
| 3585.294     | 0.00558     | 3838.698     | 0.00898     | 3316.806     | 0.00883     |
| 3619.65      | 0.0057      | 3979.218     | 0.00971     | 3421.434     | 0.00842     |
| 3672.264     | 0.00568     | 4086.246     | 0.00996     | 3516.558     | 0.00824     |
| 3745.02      | 0.00565     | 4153.326     | 0.01033     | 3566.01      | 0.00802     |
| 3763.662     | 0.00574     | 4222.536     | 0.01184     | 3582.846     | 0.00851     |
| 3782.448     | 0.00583     | 4444.842     | 0.01513     | 3634.266     | 0.00828     |
| 3782.406     | 0.00554     | 4780.284     | 0.01851     | 3651.804     | 0.00893     |
| 3820.644     | 0.00688     | 5241.852     | 0.01896     | 3687.156     | 0.00906     |
| 3919.71      | 0.00807     | 5547.81      | 0.01841     | 3723.396     | 0.00976     |
| 4089.204     | 0.00761     | 5672.184     | 0.01763     | 3816.894     | 0.00939     |
| 4202.802     | 0.00831     | 5802.048     | 0.0179      | 3836.178     | 0.0105      |
| 4322.754     | 0.00923     | 5801.898     | 0.01763     | 3915.324     | 0.01066     |
| 4449.93      | 0.00789     | 5801.91      | 0.01724     | 3997.68      | 0.00996     |
| 4476.318     | 0.00927     | 5802.06      | 0.01765     | 4018.86      | 0.01089     |
| 4557.216     | 0.00791     | 5802.102     | 0.01754     | 4061.688     | 0.01119     |
| 4530.036     | 0.00819     | 5802.168     | 0.0176      | 4150.644     | 0.01174     |
| 4502.856     | 0.0087      | 5801.946     | 0.01825     | 4196.406     | 0.01209     |
| 4584.924     | 0.00877     | 5892         | 0.01867     | 4291.332     | 0.01326     |
| 4641.162     | 0.01018     | 5891.886     | 0.01897     | 4390.614     | 0.01449     |
| 4757.796     | 0.0093      | 5984.88      | 0.01871     | 4521.252     | 0.01506     |
| 4787.934     | 0.00932     | 5984.706     | 0.01911     | 4679.673     | 0.01643     |
| 4818.54      | 0.00994     | 5984.694     | 0.01887     | 4838.094     | 0.01792     |
| 4880.7       | 0.00957     | 6032.274     | 0.01933     | 5030.274     | 0.01813     |
| 4944.342     | 0.01071     | 6032.262     | 0.02005     | 5202.42      | 0.01808     |
| 4977.006     | 0.01006     | 6129.516     | 0.02023     | 5274.678     | 0.0185      |
| 4976.988     | 0.00999     | 6179.376     | 0.02159     | 5311.692     | 0.01802     |
| 5043.486     | 0.01211     | 6281.34      | 0.02033     | 5348.988     | 0.01868     |
| 5181.678     | 0.01108     | 6334.212     | 0.02169     | 5386.956     | 0.01885     |
| 5217.648     | 0.01071     | 6387.084     | 0.02104     | 5425.404     | 0.01848     |
| 5253.618     | 0.012       | 6333.63      | 0.02046     | 5425.512     | 0.01839     |
| 5290.35      | 0.01407     | 6387.072     | 0.02261     | 5464.44      | 0.02        |
| 5562.486     | 0.01428     | 6441.264     | 0.02257     | 5544.282     | 0.02063     |
| 5730.93      | 0.01468     | 6583.695     | 0.02554     | 5585.052     | 0.02002     |
| 5864.382     | 0.01428     | 6726.126     | 0.02665     | 5668.494     | 0.01991     |
| 5864.574     | 0.01329     | 6847.374     | 0.02745     | 5668.302     | 0.02134     |
| 5864.634     | 0.01283     | 7037.544     | 0.02847     | 5668.368     | 0.02104     |
| 5818.824     | 0.01414     | 7103.316     | 0.02857     | 5754.282     | 0.02208     |
| 5910.306     | 0.01566     | 7238.454     | 0.02976     | 5842.716     | 0.02348     |
| 6003.948     | 0.01516     | 7308.426     | 0.0293      | 5935.536     | 0.02284     |
| 6051.744     | 0.0147      | 7308.18      | 0.02799     | 6028.356     | 0.02353     |
| 6100.824     | 0.01541     | 7379.532     | 0.02826     | 6028.308     | 0.02247     |
| 6100.614     | 0.01626     | 7308.144     | 0.0288      | 6028.296     | 0.02277     |
| 6201.228     | 0.01518     | 7308.144     | 0.02928     | 6028.308     | 0.02363     |
| 6200.832     | 0.01514     | 7379.346     | 0.02932     | 6076.44      | 0.02453     |
| 6200.706     | 0.01673     | 7379.346     | 0.02895     | 6125.4       | 0.02397     |
| 6200.358     | 0.01693     | 7451.64      | 0.03029     | 6226.044     | 0.02406     |

|          |         |          |         |          |         |
|----------|---------|----------|---------|----------|---------|
| 6410.898 | 0.01701 | 7451.658 | 0.03067 | 6225.846 | 0.02589 |
| 6521.586 | 0.01613 | 7525.344 | 0.02999 | 6329.766 | 0.02471 |
| 6521.226 | 0.01606 | 7525.584 | 0.03097 | 6382.968 | 0.02679 |
| 6520.914 | 0.01608 | 7525.23  | 0.03082 | 6436.956 | 0.02882 |
| 6578.574 | 0.01592 | 7525.344 | 0.03069 | 6604.818 | 0.02833 |
| 6578.112 | 0.01611 | 7600.92  | 0.03122 | 6721.83  | 0.02956 |
| 6578.442 | 0.0158  | 7600.692 | 0.03239 | 6781.914 | 0.03078 |
| 6578.226 | 0.01705 | 7677.504 | 0.03272 | 6842.958 | 0.03001 |
| 6635.904 | 0.01648 | 7677.012 | 0.03345 | 6905.22  | 0.03043 |
| 6635.817 | 0.01682 | 7835.724 | 0.03378 | 6905.22  | 0.02986 |
| 6635.73  | 0.01581 | 7917.366 | 0.03373 | 6905.106 | 0.03103 |
| 6635.262 | 0.01641 | 7835.538 | 0.03387 | 6905.46  | 0.02965 |
| 6694.83  | 0.01585 | 7917.696 | 0.03484 | 6905.154 | 0.03048 |
| 6694.578 | 0.01611 | 7917.258 | 0.03502 | 6843.006 | 0.03004 |
| 6724.512 | 0.02102 | 8000.556 | 0.03613 | 6842.862 | 0.03084 |
| 6754.446 | 0.01634 | 8085.624 | 0.03782 | 6905.694 | 0.02993 |
| 6754.032 | 0.01837 | 8173.008 | 0.03892 | 6968.526 | 0.03138 |
| 6815.517 | 0.0198  | 8261.436 | 0.03904 | 6968.544 | 0.03133 |
| 6877.002 | 0.01846 | 8352.216 | 0.04052 | 7032.924 | 0.03136 |
| 6941.004 | 0.02155 | 8540.22  | 0.04063 | 7032.63  | 0.03285 |
| 7005.006 | 0.01927 | 8539.95  | 0.04029 | 7098.762 | 0.03073 |
| 7070.034 | 0.02171 | 8539.662 | 0.04202 | 7098.66  | 0.03271 |
| 7136.79  | 0.0206  | 8637.222 | 0.04179 | 7165.842 | 0.03255 |
| 7136.556 | 0.021   | 8637.072 | 0.04086 | 7165.734 | 0.03255 |
| 7204.956 | 0.02236 | 8736.348 | 0.04292 | 7165.584 | 0.03218 |
| 7274.088 | 0.02623 | 8736.522 | 0.04098 | 7165.872 | 0.03331 |
| 7489.44  | 0.02474 | 8636.526 | 0.0428  | 7234.038 | 0.03371 |
| 7720.182 | 0.02409 | 8736.27  | 0.04234 | 7303.428 | 0.03474 |
| 7641.192 | 0.02589 | 8838.192 | 0.04356 | 7374.558 | 0.03654 |
| 7640.838 | 0.02328 | 8838.036 | 0.04379 | 7520.454 | 0.03602 |
| 7640.976 | 0.0251  | 8837.958 | 0.04315 | 7596.012 | 0.03721 |
| 7719.306 | 0.02351 | 8838.036 | 0.04345 | 7595.784 | 0.03712 |
| 7718.988 | 0.02582 | 8837.694 | 0.04418 | 7672.32  | 0.03802 |
| 7718.352 | 0.02654 | 8942.04  | 0.04421 | 7750.758 | 0.04128 |
| 7800.372 | 0.02556 | 8942.01  | 0.04501 | 7912.35  | 0.04222 |
| 7718.868 | 0.02471 | 8941.8   | 0.04495 | 7995.438 | 0.04082 |
| 7799.784 | 0.02497 | 8941.8   | 0.04506 | 8080.764 | 0.04317 |
| 7799.178 | 0.02483 | 9049.116 | 0.04592 | 8167.464 | 0.04308 |
| 7800.168 | 0.02527 | 9048.384 | 0.04626 | 8256.3   | 0.04329 |
| 7718.712 | 0.0251  | 9048.108 | 0.04612 | 8256.138 | 0.04416 |
| 7718.43  | 0.02593 | 9157.674 | 0.04804 | 8347.638 | 0.04278 |
| 7798.77  | 0.02623 | 9157.26  | 0.04834 | 8256.276 | 0.04379 |
| 7880.862 | 0.02633 | 9268.956 | 0.04804 | 8256.048 | 0.04211 |
| 7880.262 | 0.02637 | 9268.758 | 0.04846 | 8256.456 | 0.0443  |
| 7879.83  | 0.02644 | 9383.592 | 0.05067 | 8347.452 | 0.04471 |
| 7879.206 | 0.02697 | 9383.208 | 0.05034 | 8256     | 0.04467 |
| 7962.12  | 0.02792 | 9500.496 | 0.05214 | 8346.828 | 0.04511 |
| 8048.508 | 0.02746 | 9621.366 | 0.05178 | 8440.098 | 0.04621 |
| 8048.484 | 0.02734 | 9620.934 | 0.05173 | 8439.318 | 0.0463  |
| 8135.574 | 0.02992 | 9621.06  | 0.05217 | 8534.61  | 0.04614 |
| 8132.526 | 0.02937 | 9621.12  | 0.05247 | 8534.562 | 0.04594 |
| 8222.244 | 0.0281  | 9620.658 | 0.05231 | 8534.388 | 0.04912 |
| 8220.912 | 0.03011 | 9620.778 | 0.05203 | 8631.924 | 0.04778 |
| 8221.14  | 0.03064 | 9620.844 | 0.05134 | 8631.228 | 0.04778 |
| 8311.446 | 0.03131 | 9621.06  | 0.05143 | 8731.032 | 0.05145 |
| 8499.714 | 0.032   | 9620.874 | 0.05256 | 8730.648 | 0.04993 |

|           |         |           |         |           |         |
|-----------|---------|-----------|---------|-----------|---------|
| 8696.964  | 0.03443 | 9620.598  | 0.05268 | 8730.702  | 0.04947 |
| 8797.11   | 0.0338  | 9744.912  | 0.05143 | 8832.258  | 0.05136 |
| 8692.074  | 0.03159 | 9620.904  | 0.05256 | 8832.546  | 0.05189 |
| 8796.828  | 0.03457 | 9621.09   | 0.05357 | 8936.604  | 0.05272 |
| 8797.164  | 0.03304 | 9744.276  | 0.05552 | 8936.232  | 0.05164 |
| 8794.536  | 0.03313 | 9743.868  | 0.05362 | 9043.038  | 0.0532  |
| 8793.552  | 0.03516 | 9744.15   | 0.05424 | 8935.542  | 0.05378 |
| 8898.96   | 0.03498 | 9871.314  | 0.05725 | 9042.846  | 0.05512 |
| 9007.47   | 0.03558 | 9870.858  | 0.05512 | 9151.98   | 0.05468 |
| 9005.604  | 0.03491 | 10000.968 | 0.05851 | 9151.446  | 0.05478 |
| 9005.25   | 0.03484 | 10134.996 | 0.05907 | 9151.56   | 0.05369 |
| 9005.004  | 0.03519 | 10134.486 | 0.05657 | 9151.476  | 0.05514 |
| 9003.9    | 0.03503 | 10000.5   | 0.05867 | 9042.216  | 0.0557  |
| 9003.846  | 0.03586 | 10134.384 | 0.05898 | 9151.56   | 0.05561 |
| 9113.664  | 0.03738 | 10133.904 | 0.06048 | 9151.254  | 0.0557  |
| 9228.864  | 0.03733 | 10271.298 | 0.06052 | 9263.148  | 0.058   |
| 9114.054  | 0.03517 | 10271.478 | 0.06156 | 9263.406  | 0.05653 |
| 9002.334  | 0.03495 | 10271.334 | 0.06512 | 9263.292  | 0.05918 |
| 9114.774  | 0.03544 | 10412.004 | 0.06265 | 9377.844  | 0.05729 |
| 9114.882  | 0.03664 | 10556.874 | 0.06685 | 9377.64   | 0.06138 |
| 9112.584  | 0.04084 | 10705.758 | 0.06373 | 9377.142  | 0.06142 |
| 9340.962  | 0.03643 | 10556.094 | 0.06678 | 9495.204  | 0.06121 |
| 9459.156  | 0.04116 | 10556.022 | 0.06694 | 9615.414  | 0.06216 |
| 9458.262  | 0.03911 | 10705.722 | 0.06422 | 9614.952  | 0.06227 |
| 9457.668  | 0.03705 | 10705.836 | 0.0641  | 9614.55   | 0.06198 |
| 9336.864  | 0.04151 | 10556.58  | 0.0671  | 9615.264  | 0.06283 |
| 9456.858  | 0.04035 | 10556.394 | 0.06364 | 9614.952  | 0.06239 |
| 9456.054  | 0.03657 | 10556.094 | 0.06567 | 9739.056  | 0.06204 |
| 9455.19   | 0.0401  | 10705.338 | 0.06737 | 9614.892  | 0.06244 |
| 9578.88   | 0.04045 | 10705.914 | 0.06576 | 9738.618  | 0.0635  |
| 9454.986  | 0.04268 | 10705.302 | 0.06481 | 9738.648  | 0.06532 |
| 9576.252  | 0.04114 | 10705.074 | 0.0664  | 9865.176  | 0.06929 |
| 9574.506  | 0.04017 | 10556.058 | 0.06767 | 9864.852  | 0.0656  |
| 9574.326  | 0.04077 | 10705.452 | 0.06754 | 9994.938  | 0.07137 |
| 9574.446  | 0.0407  | 10858.392 | 0.06705 | 9994.572  | 0.07127 |
| 9573.162  | 0.04043 | 10704.882 | 0.06569 | 9994.536  | 0.06739 |
| 9699.792  | 0.04031 | 10704.96  | 0.06594 | 10128.12  | 0.06913 |
| 9571.944  | 0.04142 | 10705.074 | 0.067   | 10128.36  | 0.07171 |
| 9696.876  | 0.04465 | 10704.918 | 0.06821 | 10128.6   | 0.07171 |
| 9825.852  | 0.04379 | 10704.42  | 0.06813 | 10128.498 | 0.06821 |
| 9824.472  | 0.03976 | 10858.668 | 0.06848 | 10128.054 | 0.06802 |
| 9822.216  | 0.04799 | 10704.576 | 0.06802 | 10128.36  | 0.0713  |
| 9954.312  | 0.04013 | 10858.746 | 0.06841 | 10128.222 | 0.0722  |
| 9953.88   | 0.04596 | 10858.392 | 0.06869 | 9994.506  | 0.07032 |
| 9954.144  | 0.04493 | 10858.392 | 0.06825 | 9994.404  | 0.06889 |
| 9950.382  | 0.04253 | 10857.684 | 0.06973 | 10127.742 | 0.06938 |
| 10087.32  | 0.04571 | 10857.96  | 0.07224 | 10128.084 | 0.07185 |
| 10086.984 | 0.04795 | 11015.724 | 0.07285 | 10127.952 | 0.0722  |
| 10087.422 | 0.04463 | 11015.442 | 0.06978 | 10127.676 | 0.07185 |
| 10087.152 | 0.04223 | 11015.118 | 0.07481 | 10127.64  | 0.0724  |
| 10087.305 | 0.04485 | 11014.914 | 0.07017 | 10128.12  | 0.07143 |
| 10087.458 | 0.0479  | 11177.886 | 0.07466 | 10127.814 | 0.07074 |
| 10085.184 | 0.04765 | 11014.794 | 0.07118 | 10265.358 | 0.0713  |
| 10084.608 | 0.04534 | 11177.844 | 0.07474 | 10127.814 | 0.07321 |
| 10085.118 | 0.04432 | 11014.956 | 0.07173 | 10265.148 | 0.07287 |
| 10084.422 | 0.04513 | 11014.47  | 0.07646 | 10265.394 | 0.07464 |

|           |         |           |         |           |         |
|-----------|---------|-----------|---------|-----------|---------|
| 10083.726 | 0.04658 | 11177.556 | 0.07349 | 10264.728 | 0.07519 |
| 10222.926 | 0.05099 | 11177.304 | 0.0737  | 10265.148 | 0.07443 |
| 10362.408 | 0.04959 | 11177.388 | 0.07753 | 10265.01  | 0.07388 |
| 10508.91  | 0.04892 | 11176.974 | 0.07494 | 10264.272 | 0.07365 |
| 10658.37  | 0.05046 | 11176.953 | 0.07266 | 10406.226 | 0.07981 |
| 10654.962 | 0.05538 | 11176.932 | 0.07577 | 10405.32  | 0.07594 |
| 10653.486 | 0.05125 | 11176.848 | 0.07637 | 10405.248 | 0.08131 |
| 10653.294 | 0.04966 | 11177.142 | 0.07534 | 10549.824 | 0.07564 |
| 10653.714 | 0.04951 | 11345.112 | 0.07421 | 10549.782 | 0.08286 |
| 10811.784 | 0.05344 | 11344.428 | 0.07543 | 10549.746 | 0.08103 |
| 10652.196 | 0.05404 | 11344.728 | 0.07732 | 10699.038 | 0.07665 |
| 10652.616 | 0.0542  | 11344.386 | 0.07753 | 10699.344 | 0.08186 |
| 10808.748 | 0.05279 | 11344.344 | 0.07706 | 10698.504 | 0.08385 |
| 10808.046 | 0.05371 | 11344.128 | 0.07656 | 10698.774 | 0.0824  |
| 10804.386 | 0.05275 | 11344.512 | 0.07651 | 10698.546 | 0.08036 |
| 10967.88  | 0.05249 | 11343.87  | 0.07741 | 10852.11  | 0.07873 |
| 10965.396 | 0.05104 | 11344.002 | 0.07679 | 10698.81  | 0.08113 |
| 10964.634 | 0.05484 | 11344.386 | 0.07953 | 10698.432 | 0.08265 |
| 10802.556 | 0.05773 | 11343.654 | 0.07937 | 10698.732 | 0.08329 |
| 10963.95  | 0.05404 | 11343.27  | 0.07845 | 10698.582 | 0.08378 |
| 10959.906 | 0.05319 | 11516.67  | 0.07882 | 10698.276 | 0.08371 |
| 11124.996 | 0.05828 | 11694.222 | 0.07891 | 10853.886 | 0.08495 |
| 11125.164 | 0.05288 | 11694.036 | 0.0845  | 11009.496 | 0.08389 |
| 11124.378 | 0.0575  | 11693.718 | 0.07901 | 11008.932 | 0.08758 |
| 11123.76  | 0.05732 | 11693.67  | 0.08258 | 11009.334 | 0.08895 |
| 11122.728 | 0.05049 | 11693.718 | 0.08203 | 10850.772 | 0.08443 |
| 11123.556 | 0.06168 | 11693.538 | 0.0817  | 11008.812 | 0.08925 |
| 11123.184 | 0.05108 | 11692.854 | 0.08385 | 11008.248 | 0.08991 |
| 11294.286 | 0.05741 | 11876.202 | 0.08657 | 11008.164 | 0.09179 |
| 11292.078 | 0.06135 | 11876.58  | 0.082   | 11007.642 | 0.08659 |
| 11290.464 | 0.05752 | 11876.484 | 0.0832  | 11170.566 | 0.09471 |
| 11288.718 | 0.05683 | 11876.154 | 0.08775 | 11338.128 | 0.09149 |
| 11287.914 | 0.05662 | 11876.67  | 0.0844  |           |         |
| 11465.262 | 0.05644 | 11876.718 | 0.083   |           |         |
| 11288.124 | 0.05724 | 11875.92  | 0.08547 |           |         |
| 11465.082 | 0.05773 | 11876.016 | 0.0871  |           |         |
| 11287.404 | 0.05752 | 11875.638 | 0.08754 |           |         |
| 11286.552 | 0.05939 | 11875.92  | 0.08786 |           |         |
| 11462.064 | 0.06077 | 11874.978 | 0.08772 |           |         |
| 11461.272 | 0.06094 | 12064.524 | 0.08936 |           |         |
| 11460.966 | 0.05815 | 12064.374 | 0.09042 |           |         |
| 11460.576 | 0.05588 | 12064.62  | 0.0902  |           |         |
| 11460.882 | 0.05616 | 12064.668 | 0.08869 |           |         |
| 11460.708 | 0.05736 | 12064.47  | 0.08807 |           |         |
| 11460.792 | 0.05951 | 12259.86  | 0.0871  |           |         |
| 11461.098 | 0.06156 | 12064.956 | 0.08874 |           |         |
| 11460.75  | 0.06008 | 12259.56  | 0.09296 |           |         |
| 11461.188 | 0.05946 | 12259.434 | 0.09169 |           |         |
| 11461.056 | 0.05819 | 12259.308 | 0.08743 |           |         |
| 11459.214 | 0.059   | 12259.608 | 0.09613 |           |         |
| 11735.397 | 0.06159 | 12259.158 | 0.08918 |           |         |
| 12011.58  | 0.06509 | 12258.66  | 0.09714 |           |         |
| 12010.374 | 0.06562 | 12460.746 | 0.08837 |           |         |
| 12009.702 | 0.06482 | 12461.01  | 0.09763 |           |         |
| 12008.91  | 0.06422 | 12460.44  | 0.09276 |           |         |
| 12008.118 | 0.06392 | 12461.112 | 0.09077 |           |         |

|           |         |  |  |  |  |
|-----------|---------|--|--|--|--|
| 12008.742 | 0.06389 |  |  |  |  |
| 12007.542 | 0.06362 |  |  |  |  |
| 12008.742 | 0.06366 |  |  |  |  |
| 12006.63  | 0.06461 |  |  |  |  |
| 12005.424 | 0.06433 |  |  |  |  |
| 12004.848 | 0.0617  |  |  |  |  |
| 12003.072 | 0.06202 |  |  |  |  |
| 12004.464 | 0.06625 |  |  |  |  |
| 12004.224 | 0.0682  |  |  |  |  |
| 12002.256 | 0.06834 |  |  |  |  |
| 12202.266 | 0.06094 |  |  |  |  |
| 12200.976 | 0.06835 |  |  |  |  |
| 12198.444 | 0.06977 |  |  |  |  |
| 12199.98  | 0.06115 |  |  |  |  |

Data of Figure 15

| APC 8045     |             | APC 9045     |             | APC 1145     |             | APC 1245     |             |
|--------------|-------------|--------------|-------------|--------------|-------------|--------------|-------------|
| Speed(r/min) | CT0         | Speed(r/min) | CT0         | Speed(r/min) | CT0         | Speed(r/min) | CT0         |
| 3898.908     | 0.001421955 | 2711.484     | 0.000309069 | 2960.952     | 6.23043E-05 | 2766.066     | 1.84118E-05 |
| 4556.55      | 0.001680923 | 3026.028     | 0.000827934 | 2996.148     | 9.62241E-05 | 2807.28      | 3.61651E-05 |
| 4848.762     | 0.001801367 | 3260.79      | 0.000979395 | 3032.316     | 3.22707E-05 | 2828.28      | 7.59998E-06 |
| 4976.256     | 0.001877047 | 3392.346     | 0.001005919 | 3076.152     | 4.9898E-06  | 2849.676     | 2.12916E-05 |
| 5110.926     | 0.001922062 | 3518.568     | 0.001290381 | 3119.988     | 0.000242624 | 2860.398     | 4.85364E-05 |
| 5216.502     | 0.002104004 | 3602.322     | 0.001480502 | 3185.838     | 0.000384758 | 2893.272     | 0.000156532 |
| 5252.718     | 0.002072157 | 3672.318     | 0.001567092 | 3212.916     | 0.000400273 | 2984.796     | 0.00035572  |
| 5364.45      | 0.002166901 | 3708.402     | 0.001724252 | 3240.564     | 0.000337268 | 3032.79      | 0.000422941 |
| 5441.37      | 0.002171693 | 3801.498     | 0.002148167 | 3240.504     | 0.000408608 | 3082.266     | 0.000470194 |
| 5481.006     | 0.002197045 | 3919.578     | 0.002070101 | 3254.49      | 0.000407245 | 3094.926     | 0.000623593 |
| 5521.05      | 0.002263614 | 4045.47      | 0.00215333  | 3268.578     | 0.000410111 | 3133.404     | 0.00064266  |
| 5561.682     | 0.002285623 | 4089.21      | 0.002288986 | 3297.234     | 0.000375891 | 3159.666     | 0.000720285 |
| 5561.562     | 0.002262165 | 4111.344     | 0.002255436 | 3355.776     | 0.000385047 | 3227.154     | 0.000842811 |
| 5561.496     | 0.002291011 | 4133.892     | 0.002387709 | 3416.58      | 0.000361747 | 3297.588     | 0.000867607 |
| 5644.74      | 0.002368867 | 4156.626     | 0.00249336  | 3495.66      | 0.000458835 | 3341.448     | 0.000945418 |
| 5730.528     | 0.002345313 | 4226.268     | 0.002527938 | 3561.606     | 0.000592278 | 3371.208     | 0.001065577 |
| 5729.994     | 0.002363011 | 4250.046     | 0.002524914 | 3595.59      | 0.000695249 | 3386.34      | 0.001102164 |
| 5773.992     | 0.002380609 | 4298.274     | 0.00254249  | 3630.144     | 0.000730307 | 3401.628     | 0.001104764 |
| 5818.398     | 0.002339627 | 4372.83      | 0.002631034 | 3665.34      | 0.000794048 | 3417.012     | 0.001200513 |
| 5863.29      | 0.002327487 | 4398.3       | 0.002577137 | 3701.412     | 0.000810103 | 3480.03      | 0.001403509 |
| 5863.212     | 0.002450056 | 4398.144     | 0.00252245  | 3756.576     | 0.000845991 | 3528.744     | 0.00153488  |
| 5863.476     | 0.002539365 | 4398.192     | 0.00270273  | 3832.926     | 0.000970201 | 3578.952     | 0.001590945 |
| 6051.132     | 0.002740458 | 4449.954     | 0.002645324 | 3892.062     | 0.001378394 | 3596.016     | 0.001574643 |
| 6199.86      | 0.00301305  | 4476.336     | 0.002760633 | 3995.166     | 0.001777363 | 3613.254     | 0.001715523 |
| 6303.366     | 0.002902684 | 4476.21      | 0.002743131 | 4081.494     | 0.002392286 | 3648         | 0.00182147  |
| 6356.388     | 0.002850453 | 4503.06      | 0.002777814 | 4241.946     | 0.002956302 | 3701.742     | 0.00195957  |
| 6409.83      | 0.002787316 | 4529.982     | 0.002850852 | 4339.518     | 0.003177949 | 3880.866     | 0.002356291 |
| 6464.586     | 0.002697679 | 4584.894     | 0.002920118 | 4441.758     | 0.003357714 | 4059.99      | 0.00250387  |
| 6520.902     | 0.002725576 | 4612.818     | 0.00296088  | 4494.534     | 0.003359068 | 4126.59      | 0.002521571 |
| 6693.846     | 0.002884826 | 4612.866     | 0.003032124 | 4521.24      | 0.003313955 | 4172.226     | 0.002592812 |
| 6876.852     | 0.002933726 | 4669.704     | 0.002917041 | 4548.546     | 0.003342304 | 4242.486     | 0.002804097 |
| 6939.642     | 0.0030272   | 4787.982     | 0.002982031 | 4604.208     | 0.003363673 | 4290.72      | 0.002991199 |
| 7004.19      | 0.003116949 | 4866.228     | 0.003085485 | 4632.438     | 0.003511034 | 4315.188     | 0.003072678 |
| 7002.03      | 0.003170061 | 4944.474     | 0.003334016 | 4660.962     | 0.003620717 | 4365.12      | 0.003045667 |

|          |             |          |             |          |             |          |             |
|----------|-------------|----------|-------------|----------|-------------|----------|-------------|
| 7068.552 | 0.003248502 | 4944.3   | 0.003412857 | 4689.984 | 0.003681272 | 4390.542 | 0.00313519  |
| 7271.598 | 0.003064993 | 5043.396 | 0.00362199  | 4719.294 | 0.003688668 | 4416.024 | 0.003166488 |
| 7489.104 | 0.003103293 | 5146.404 | 0.004028307 | 4719.366 | 0.003634558 | 4442.112 | 0.003207355 |
| 7563.684 | 0.003111766 | 5181.582 | 0.004126352 | 4719.234 | 0.003665336 | 4494.858 | 0.003251491 |
| 7641.09  | 0.003175276 | 5181.492 | 0.00441091  | 4809.45  | 0.003477124 | 4576.794 | 0.003241671 |
| 7639.614 | 0.003225081 | 5327.706 | 0.004916786 | 4840.35  | 0.003520043 | 4632.87  | 0.003304775 |
| 7640.256 | 0.003220379 | 5365.188 | 0.005285742 | 4871.568 | 0.003579292 | 4661.394 | 0.003380234 |
| 7640.256 | 0.003241182 | 5521.812 | 0.006197467 | 4935.15  | 0.003717806 | 4690.59  | 0.003433688 |
| 7640.004 | 0.003277486 | 5687.886 | 0.005733019 | 5034.066 | 0.003669859 | 4690.404 | 0.003467462 |
| 7640.118 | 0.003306543 | 5819.682 | 0.006419874 | 5000.55  | 0.00373736  | 4690.41  | 0.003518427 |
| 7719.348 | 0.003230836 | 5819.298 | 0.006099685 | 5034.072 | 0.003726258 | 4719.816 | 0.00361283  |
| 7799.214 | 0.003322138 | 5864.448 | 0.005826744 | 5101.986 | 0.003789884 | 4749.438 | 0.003741941 |
| 7879.746 | 0.00346461  | 5819.298 | 0.006383378 | 5171.94  | 0.003929005 | 4809.996 | 0.003750112 |
| 7878.174 | 0.00352863  | 5864.976 | 0.006343138 | 5207.382 | 0.004145171 | 4840.692 | 0.003758775 |
| 7961.7   | 0.003485659 | 5819.268 | 0.005917572 | 5317.662 | 0.004402781 | 4871.916 | 0.003777591 |
| 7961.34  | 0.003571605 | 5864.622 | 0.006133675 | 5432.28  | 0.004631151 | 4935.864 | 0.003890139 |
| 7961.274 | 0.003565252 | 5910.246 | 0.00634334  | 5471.526 | 0.005216113 | 5001.324 | 0.00390621  |
| 8048.658 | 0.003483257 | 5910.564 | 0.006504752 | 5552.286 | 0.005762595 | 5034.42  | 0.004046573 |
| 7960.476 | 0.003628619 | 5910.408 | 0.006615113 | 5593.194 | 0.005960806 | 5102.664 | 0.004107683 |
| 8046.456 | 0.003617784 | 5956.728 | 0.00689173  | 5593.572 | 0.00605719  | 5102.328 | 0.004200539 |
| 8134.404 | 0.003526518 | 6052.182 | 0.006930056 | 5634.996 | 0.006706744 | 5136.996 | 0.004237547 |
| 8133.408 | 0.003527382 | 6051.936 | 0.00706729  | 5764.008 | 0.006715892 | 5244.162 | 0.004365017 |
| 8132.592 | 0.003600334 | 6150.576 | 0.007096408 | 5853.522 | 0.006896859 | 5317.998 | 0.004535876 |
| 8221.86  | 0.003526171 | 6151.134 | 0.007744644 | 5945.88  | 0.00711564  | 5472.198 | 0.00461292  |
| 8312.094 | 0.003554363 | 6150.288 | 0.008328279 | 5992.488 | 0.007229092 | 5511.756 | 0.004938307 |
| 8404.776 | 0.003633486 | 6201.024 | 0.007498209 | 6040.884 | 0.007209499 | 5594.196 | 0.005207028 |
| 8403.834 | 0.0036343   | 6252.126 | 0.01065806  | 6040.788 | 0.007238956 | 5635.536 | 0.005464397 |
| 8403.15  | 0.003775982 | 6411.048 | 0.010910055 | 6089.85  | 0.007150322 | 5677.794 | 0.005707436 |
| 8403.03  | 0.003771504 | 6465.642 | 0.011827325 | 6040.518 | 0.007229022 | 5720.724 | 0.00574401  |
| 8499.834 | 0.003738776 | 6521.496 | 0.012338993 | 6040.518 | 0.007218454 | 5764.644 | 0.005855959 |
| 8496.948 | 0.003921943 | 6521.724 | 0.012744722 | 6089.922 | 0.007082227 | 5809.11  | 0.005715842 |
| 8593.38  | 0.003966039 | 6521.76  | 0.01289319  | 6089.892 | 0.007051704 | 5764.344 | 0.00588357  |
| 8692.752 | 0.003999156 | 6521.796 | 0.012786055 | 6089.862 | 0.007097058 | 5764.362 | 0.005947195 |
| 8691.372 | 0.004052963 | 6521.61  | 0.012596552 | 6089.838 | 0.007125261 | 5809.104 | 0.005823645 |
| 8795.28  | 0.00398081  | 6521.526 | 0.01229132  | 6089.502 | 0.007286997 | 5854.254 | 0.005859458 |
| 8900.784 | 0.003964682 | 6521.568 | 0.01218176  | 6089.208 | 0.007285253 | 5853.672 | 0.006145877 |
| 8898.804 | 0.004054431 | 6578.916 | 0.011894385 | 6139.566 | 0.007233667 | 5945.928 | 0.006100315 |

|           |             |          |             |          |             |          |             |
|-----------|-------------|----------|-------------|----------|-------------|----------|-------------|
| 9004.68   | 0.004118462 | 6521.538 | 0.012340022 | 6138.984 | 0.007260931 | 5993.334 | 0.006032737 |
| 9112.17   | 0.004373059 | 6521.202 | 0.01243761  | 6241.278 | 0.007378504 | 5993.118 | 0.006056814 |
| 9336.978  | 0.004359193 | 6578.514 | 0.012355026 | 6240.822 | 0.007493778 | 6041.334 | 0.006016276 |
| 9577.872  | 0.004318384 | 6578.616 | 0.012448117 | 6240.222 | 0.007344863 | 6041.202 | 0.006123666 |
| 9451.59   | 0.0045089   | 6578.286 | 0.01263867  | 6240.156 | 0.007641659 | 6090.306 | 0.006075431 |
| 9574.446  | 0.004497312 | 6578.556 | 0.01271943  | 6292.752 | 0.00722275  | 6041.07  | 0.006226239 |
| 9701.106  | 0.004497687 | 6578.502 | 0.012727814 | 6292.446 | 0.007579952 | 6040.824 | 0.006334765 |
| 9700.542  | 0.004527479 | 6636.138 | 0.012385964 | 6239.886 | 0.007409189 | 6139.668 | 0.006321164 |
| 9699.726  | 0.004616045 | 6695.25  | 0.01225621  | 6292.146 | 0.007851224 | 6189.612 | 0.006441652 |
| 9699.948  | 0.004605509 | 6635.712 | 0.012888263 | 6399.834 | 0.007414699 | 6346.128 | 0.0064688   |
| 9699.132  | 0.004665682 | 6635.736 | 0.013214313 | 6454.722 | 0.00740134  | 6345.03  | 0.006481382 |
| 9698.508  | 0.004712795 | 6635.76  | 0.013396813 | 6398.856 | 0.007721245 | 6399.618 | 0.006445231 |
| 9697.128  | 0.004826112 | 6635.598 | 0.013454884 | 6398.922 | 0.007593052 | 6399.576 | 0.006527086 |
| 9695.844  | 0.004873049 | 6694.71  | 0.013265714 | 6398.892 | 0.007934538 | 6454.692 | 0.006551467 |
| 9825.534  | 0.004897965 | 6754.704 | 0.011698955 | 6398.622 | 0.008279974 | 6509.808 | 0.006561241 |
| 9823.794  | 0.00497859  | 6754.26  | 0.011850125 | 6454.29  | 0.007907327 | 6566.46  | 0.006573377 |
| 9822.282  | 0.005043093 | 6753.972 | 0.014131382 | 6453.276 | 0.007671124 | 6566.439 | 0.006974021 |
| 9953.682  | 0.005151176 | 6815.688 | 0.012594307 | 6452.904 | 0.00780499  | 6566.418 | 0.006991531 |
| 10085.862 | 0.00515718  | 6784.929 | 0.011125931 | 6623.19  | 0.007559353 | 6566.106 | 0.007026014 |
| 10224.984 | 0.005177391 | 6754.17  | 0.013957628 | 6682.17  | 0.007636911 | 6624.888 | 0.006895681 |
| 10221.324 | 0.00531522  | 6877.578 | 0.012452047 | 6681.204 | 0.007799775 | 6565.83  | 0.007022518 |
| 10219.794 | 0.005406    | 6940.848 | 0.012611286 | 6741.738 | 0.007524521 | 6624.27  | 0.006925086 |
| 10362.444 | 0.00535172  | 7005.108 | 0.011274248 | 6866.028 | 0.007504412 | 6624.156 | 0.006922397 |
| 10360.62  | 0.00544868  | 7004.814 | 0.012814842 | 6927.576 | 0.008365634 | 6624.156 | 0.006922032 |
| 10506.264 | 0.005430741 | 7004.598 | 0.012067414 | 6991.686 | 0.008248205 | 6624.126 | 0.00691005  |
| 10652.424 | 0.005621784 | 7004.388 | 0.011256992 | 6990.66  | 0.008271058 | 6624.228 | 0.006932109 |
| 10806.564 | 0.005669947 | 7004.682 | 0.01267929  | 7057.746 | 0.008412527 | 6623.526 | 0.006976312 |
| 10964.634 | 0.00584653  | 7004.664 | 0.012362949 | 6990.348 | 0.008575065 | 6682.794 | 0.006898684 |
| 10961.148 | 0.005992496 | 7070.07  | 0.011512126 | 7057.08  | 0.0083567   | 6682.212 | 0.006861127 |
| 11124.54  | 0.006118173 | 7136.076 | 0.011339866 | 7056.198 | 0.008414852 | 6742.116 | 0.006684409 |
| 11121.576 | 0.006198709 | 7136.976 | 0.011354866 | 7055.85  | 0.008599833 | 6803.646 | 0.006730895 |
| 11293.482 | 0.006163841 | 7205.01  | 0.01120379  | 7123.626 | 0.008690985 | 6803.154 | 0.006736374 |
| 11292.756 | 0.006199576 | 7205.028 | 0.011267038 | 7191.246 | 0.00878678  | 6803.076 | 0.006531911 |
| 11293.44  | 0.006275034 | 7204.506 | 0.011418706 | 7190.364 | 0.008857413 | 6803.094 | 0.006783575 |
| 11293.014 | 0.006349806 | 7344.588 | 0.01058044  | 7260.738 | 0.008791582 | 6802.644 | 0.006802476 |
| 11206.077 | 0.006496446 | 7489.494 | 0.011083693 | 7331.592 | 0.008814997 | 6865.14  | 0.006723386 |
| 11119.14  | 0.00666919  | 7642.26  | 0.010243273 | 7330.896 | 0.009087344 | 6927.636 | 0.007002276 |



|           |             |          |             |          |             |          |             |
|-----------|-------------|----------|-------------|----------|-------------|----------|-------------|
| 11466.924 | 0.006374884 | 7641.66  | 0.01041719  | 7403.64  | 0.009013151 | 6991.704 | 0.006986307 |
| 11465.478 | 0.006457822 | 7640.706 | 0.01086241  | 7403.55  | 0.008914002 | 7057.596 | 0.006762529 |
| 11287.404 | 0.006689892 | 7718.61  | 0.010707891 | 7402.146 | 0.009347306 | 6990.84  | 0.006993932 |
| 11285.028 | 0.006824365 | 7799.136 | 0.01049207  | 7551.312 | 0.009067629 | 6991.524 | 0.007124997 |
| 11460.18  | 0.006677177 | 7798.464 | 0.010493878 | 7626.852 | 0.009262649 | 7056.684 | 0.007184834 |
| 11460.27  | 0.006724561 | 7798.368 | 0.010526566 | 7706.454 | 0.009038659 | 7191.918 | 0.007120395 |
| 11459.874 | 0.006774983 | 7881.69  | 0.01030599  | 7705.623 | 0.008958437 | 7261.476 | 0.007065775 |
| 11460.444 | 0.006773693 | 7799.094 | 0.010572833 | 7704.792 | 0.009104872 | 7260.51  | 0.007094707 |
| 11459.916 | 0.006844014 | 7881.942 | 0.010365567 | 7704.318 | 0.00930863  | 7332.9   | 0.006956215 |
| 11644.2   | 0.006623127 | 7881.132 | 0.010540289 | 7783.596 | 0.009218487 | 7332.078 | 0.007010827 |
| 11460.222 | 0.006895453 | 7880.448 | 0.010696021 | 7866.048 | 0.009079062 | 7259.508 | 0.007245339 |
| 11459.526 | 0.006877166 | 7879.941 | 0.010641201 | 7865.922 | 0.009122627 | 7331.094 | 0.007195469 |
| 11459.832 | 0.006924292 | 7879.434 | 0.010545646 | 7865.388 | 0.009122032 | 7404.318 | 0.007021704 |
| 11460.048 | 0.006913539 | 7880.094 | 0.01045757  | 7865.448 | 0.009139507 | 7403.772 | 0.006984155 |
| 11459.742 | 0.006948455 | 7879.23  | 0.010578774 | 7865.202 | 0.009130171 | 7330.428 | 0.007220632 |
| 11460.138 | 0.006930703 | 7879.632 | 0.010701493 | 7865.448 | 0.009086313 | 7404.132 | 0.007085189 |
| 11460.444 | 0.00693588  | 7880.034 | 0.010662129 | 7865.43  | 0.009090021 | 7330.086 | 0.007153309 |
| 11460.528 | 0.006937011 | 7964.682 | 0.010426327 | 7864.914 | 0.009128273 | 7330.428 | 0.007155324 |
| 11460.222 | 0.00692382  | 7963.242 | 0.010391028 | 7948.494 | 0.00927711  | 7403.184 | 0.007181437 |
| 11643.75  | 0.006731173 | 8049.24  | 0.010835923 | 8118.462 | 0.009255986 | 7329.21  | 0.007285375 |
| 11460.138 | 0.006903567 | 8135.106 | 0.010525094 | 8207.778 | 0.009129072 | 7401.594 | 0.007388386 |
| 11459.874 | 0.006966801 | 8133.522 | 0.010973296 | 8207.622 | 0.009047893 | 7549.56  | 0.007246952 |
| 11823.03  | 0.006890738 | 8314.326 | 0.010294218 | 8207.778 | 0.009186675 | 7626.522 | 0.007226223 |
| 12005.232 | 0.006981026 | 8406.396 | 0.010107896 | 8206.296 | 0.009263792 | 7705.464 | 0.007108065 |
| 12002.256 | 0.007157102 | 8404.68  | 0.010213668 | 8298.342 | 0.009032069 | 7705.842 | 0.007112223 |
| 11999.616 | 0.007266562 | 8500.248 | 0.01010077  | 8297.448 | 0.009112798 | 7704.636 | 0.007250223 |
| 12201.468 | 0.007084714 | 8498.802 | 0.010169311 | 8294.742 | 0.009255628 | 7866.48  | 0.007064491 |
| 12199.536 | 0.007195263 | 8498.268 | 0.010175488 | 8389.194 | 0.009105137 | 7864.686 | 0.007086109 |
| 12402.432 | 0.007163971 | 8498.268 | 0.010001846 | 8485.842 | 0.008931064 | 7949.862 | 0.006943446 |
| 12400.386 | 0.007334371 | 8598.282 | 0.00978694  | 8387.832 | 0.00918422  | 7863.984 | 0.007160441 |
| 12399.156 | 0.007459103 | 8597.022 | 0.010508874 | 8483.562 | 0.009048116 | 7949.274 | 0.007050466 |
| 12399.768 | 0.007523691 | 8794.2   | 0.010452213 | 8581.896 | 0.008918061 | 7948.218 | 0.007095964 |
| 12400.638 | 0.007596384 | 9007.818 | 0.010137469 | 8579.862 | 0.008927227 | 8034.6   | 0.006942715 |
| 12400.386 | 0.007660419 | 9005.898 | 0.010225956 | 8579.736 | 0.00900209  | 7946.85  | 0.007174017 |
| 12399.87  | 0.007697409 | 9117.042 | 0.010071233 | 8681.16  | 0.008843561 | 8033.076 | 0.007041691 |
| 12400.026 | 0.007704587 | 9115.854 | 0.010041002 | 8680.806 | 0.008846396 | 8121.126 | 0.007010088 |
| 12400.176 | 0.007766034 | 9116.022 | 0.010061918 | 8780.61  | 0.00889339  | 8209.71  | 0.006948063 |

|           |             |          |             |          |             |          |             |
|-----------|-------------|----------|-------------|----------|-------------|----------|-------------|
| 12397.77  | 0.007792235 | 9004.008 | 0.010301981 | 8778.192 | 0.008871485 | 8300.202 | 0.006954379 |
| 12613.416 | 0.0075963   | 9116.13  | 0.010167565 | 8777.808 | 0.008892587 | 8298.318 | 0.006979176 |
| 12604.302 | 0.007872912 | 9114.882 | 0.010348681 | 8883.834 | 0.008757215 | 8297.976 | 0.006986734 |
| 12822.048 | 0.007827519 | 9114.138 | 0.010297411 | 8777.142 | 0.00894932  | 8297.538 | 0.006970946 |
| 13048.752 | 0.007651603 | 9113.97  | 0.010233256 | 8777.19  | 0.008882939 | 8297.472 | 0.007035527 |
| 13046.256 | 0.007708309 | 9113.862 | 0.010326646 | 8777.244 | 0.008958533 | 8295.702 | 0.007083002 |
| 12817.338 | 0.008030974 | 9113.64  | 0.010486652 | 8777.19  | 0.009033766 | 8389.59  | 0.007105658 |
| 13044.558 | 0.007806947 | 9228.33  | 0.010171804 | 8882.07  | 0.00887576  | 8482.602 | 0.007021942 |
| 13044.78  | 0.007883317 | 9227.022 | 0.010083812 | 8989.41  | 0.008735548 | 8580.84  | 0.00686121  |
| 13039.962 | 0.007987747 | 9227.814 | 0.010314266 | 8988.198 | 0.008746052 | 8580.696 | 0.0068597   |
| 13276.392 | 0.007743466 | 9225.09  | 0.010303729 | 8988.066 | 0.008711756 | 8580.768 | 0.006882655 |
| 13037.076 | 0.008045614 | 9223.728 | 0.010388196 | 8988.252 | 0.008745385 | 8580.624 | 0.006881794 |
| 13039.626 | 0.008077711 | 9224.016 | 0.010442222 | 9099.234 | 0.008615855 | 8579.91  | 0.006887295 |
| 13276.566 | 0.007824136 | 9223.02  | 0.010467662 | 8985.024 | 0.008857085 | 8579.52  | 0.006927756 |
| 13274.16  | 0.007923046 | 9222.822 | 0.010543016 | 9096.918 | 0.008664669 | 8579.196 | 0.006931547 |
| 13270.224 | 0.008097012 | 9339.072 | 0.010493795 | 9096.312 | 0.008646623 | 8579.736 | 0.006910428 |
| 13513.998 | 0.007912644 | 9458.472 | 0.010116351 | 9210.846 | 0.008496053 | 8579.37  | 0.00694302  |
| 13268.64  | 0.008233285 | 9458.946 | 0.010270199 | 9209.292 | 0.008778275 | 8578.98  | 0.006945175 |
| 13270.05  | 0.008266495 | 9457.248 | 0.010346253 | 9319.404 | 0.008702972 | 8679.252 | 0.006881559 |
| 13269.402 | 0.008308702 | 9336.516 | 0.010486195 | 9316.452 | 0.00881124  | 8677.014 | 0.006939377 |
| 13268.874 | 0.008349387 | 9456.174 | 0.010278482 | 9437.67  | 0.008607242 | 8676.012 | 0.006988449 |
| 13266.588 | 0.008478825 | 9457.488 | 0.010338936 | 9437.256 | 0.00862227  | 8780.556 | 0.006825315 |
| 13508.1   | 0.008407398 | 9335.7   | 0.010676591 | 9434.466 | 0.008721451 | 8780.454 | 0.006876602 |
| 13758.126 | 0.008235965 | 9454.836 | 0.010528013 | 9558.312 | 0.008522492 |          |             |
| 13756.986 | 0.008297254 | 9577.686 | 0.010366611 |          |             |          |             |
| 13505.604 | 0.00862588  | 9574.662 | 0.010482929 |          |             |          |             |
| 13504.026 | 0.008701184 | 9574.446 | 0.010540764 |          |             |          |             |
| 13503.966 | 0.008735899 | 9700.578 | 0.010289391 |          |             |          |             |
| 13504.692 | 0.008778045 | 9699.228 | 0.010298165 |          |             |          |             |
| 13755.918 | 0.008515134 | 9699.324 | 0.010295813 |          |             |          |             |
| 13752.762 | 0.008595268 | 9697.848 | 0.010419928 |          |             |          |             |
| 13751.628 | 0.008645088 | 9697.062 | 0.010602302 |          |             |          |             |
| 14012.01  | 0.008377517 | 9825.078 | 0.010242431 |          |             |          |             |
| 13746.774 | 0.008730485 | 9822.408 | 0.010478605 |          |             |          |             |
| 13747.656 | 0.008745651 | 9822.408 | 0.010363826 |          |             |          |             |
| 14013.582 | 0.008433791 | 9956.688 | 0.010210119 |          |             |          |             |
| 14010.834 | 0.008454017 | 9956.16  | 0.010155594 |          |             |          |             |

|           |             |           |             |  |  |  |  |
|-----------|-------------|-----------|-------------|--|--|--|--|
| 13748.604 | 0.008791155 | 9954.576  | 0.010445105 |  |  |  |  |
| 14012.73  | 0.00849752  | 10088.478 | 0.010304311 |  |  |  |  |
| 14010.246 | 0.008516627 | 10086.342 | 0.010256492 |  |  |  |  |
| 14008.806 | 0.008523328 | 10086.846 | 0.01027187  |  |  |  |  |
| 14008.35  | 0.008549066 | 10084.812 | 0.010380921 |  |  |  |  |
| 14006.388 | 0.008595635 | 10084.95  | 0.010438799 |  |  |  |  |
| 14005.278 | 0.008675873 | 10084.812 | 0.010433619 |  |  |  |  |
| 14005.47  | 0.008714036 | 10226.898 | 0.010155391 |  |  |  |  |
| 14001.09  | 0.008717011 | 10084.506 | 0.010442711 |  |  |  |  |
| 14000.898 | 0.008749067 | 10226.55  | 0.010174456 |  |  |  |  |
| 14274.906 | 0.008499488 | 10224.324 | 0.010261119 |  |  |  |  |
| 14269.002 | 0.008666839 | 10223.976 | 0.010336792 |  |  |  |  |
| 14555.97  | 0.008449284 | 10222.824 | 0.010375897 |  |  |  |  |
| 14549.478 | 0.008636659 | 10222.86  | 0.01039276  |  |  |  |  |
| 14546.298 | 0.008710493 | 10222.65  | 0.010462871 |  |  |  |  |
| 14547.006 | 0.008787721 | 10364.34  | 0.010375521 |  |  |  |  |
| 14546.442 | 0.008864196 | 10362.48  | 0.010535108 |  |  |  |  |
| 14546.16  | 0.008877557 | 10362.048 | 0.010591559 |  |  |  |  |
| 14545.596 | 0.008916143 | 10507.182 | 0.010560228 |  |  |  |  |
| 14545.806 | 0.008911294 | 10655.868 | 0.010299648 |  |  |  |  |
| 14543.058 | 0.00892156  | 10655.226 | 0.010487951 |  |  |  |  |
| 14545.734 | 0.008927843 | 10809.564 | 0.01042299  |  |  |  |  |
| 14546.586 | 0.008921824 | 10806.84  | 0.010518304 |  |  |  |  |
| 14546.442 | 0.008957981 | 10805.982 | 0.010575404 |  |  |  |  |
| 14547.15  | 0.008959022 | 10806.564 | 0.010599375 |  |  |  |  |
| 14547.36  | 0.008964892 | 10967.88  | 0.010346622 |  |  |  |  |
| 14546.934 | 0.008962348 | 10967.076 | 0.010362015 |  |  |  |  |
| 14549.196 | 0.008858546 | 10805.478 | 0.010650448 |  |  |  |  |
|           |             | 10968     | 0.010446441 |  |  |  |  |

Data of Figure 16

| APC 9045     |             | APC 9060     |             | APC 9075     |             |
|--------------|-------------|--------------|-------------|--------------|-------------|
| Speed(r/min) | CT0         | Speed(r/min) | CT0         | Speed(r/min) | CT0         |
| 2711.484     | 0.000309528 | 2763.84      | 0.000942013 | 3218.388     | 8.45704E-05 |
| 3026.028     | 0.000829165 | 2980.596     | 0.001214744 | 3316.836     | 0.000346667 |
| 3260.79      | 0.000980851 | 3166.884     | 0.001055848 | 3421.338     | 0.000710842 |
| 3392.346     | 0.001007414 | 3262.074     | 0.001894535 | 3516.354     | 0.000975959 |
| 3518.568     | 0.001292298 | 3408.336     | 0.002097251 | 3651.63      | 0.001451917 |
| 3602.322     | 0.001482702 | 3518.814     | 0.002078084 | 3797.766     | 0.001970807 |
| 3672.318     | 0.001569421 | 3585.18      | 0.002281617 | 3894.948     | 0.002094033 |
| 3708.402     | 0.001726815 | 3725.766     | 0.002207486 | 3955.872     | 0.002330973 |
| 3801.498     | 0.00215136  | 3838.728     | 0.002615611 | 4018.692     | 0.002349623 |
| 3919.578     | 0.002073178 | 3958.584     | 0.00285066  | 4061.682     | 0.00250578  |
| 4045.47      | 0.00215653  | 4086.246     | 0.002927054 | 4173.222     | 0.002553937 |
| 4089.21      | 0.002292388 | 4245.996     | 0.003132315 | 4315.68      | 0.002727987 |
| 4111.344     | 0.002258788 | 4418.82      | 0.00341076  | 4494.27      | 0.002808842 |
| 4133.892     | 0.002391258 | 4691.586     | 0.003849376 | 4659.774     | 0.003039645 |
| 4156.626     | 0.002497065 | 4903.5       | 0.003814489 | 4807.23      | 0.003449873 |
| 4226.268     | 0.002531695 | 5170.362     | 0.004143136 | 5030.172     | 0.004151566 |
| 4250.046     | 0.002528666 | 5278.17      | 0.004760883 | 5097.414     | 0.00467225  |
| 4298.274     | 0.002546268 | 5352.51      | 0.005138601 | 5202.444     | 0.005276927 |
| 4372.83      | 0.002634944 | 5352.576     | 0.005493731 | 5238.234     | 0.005539105 |
| 4398.3       | 0.002580967 | 5352.462     | 0.005981819 | 5202.138     | 0.005943711 |
| 4398.144     | 0.002526199 | 5352.486     | 0.006384738 | 5238.072     | 0.006486252 |
| 4398.192     | 0.002706746 | 5390.466     | 0.006776083 | 5238.054     | 0.006683768 |
| 4449.954     | 0.002649255 | 5468.166     | 0.007213196 | 5238.228     | 0.00678482  |
| 4476.336     | 0.002764736 | 5547.894     | 0.007838218 | 5274.588     | 0.007192111 |
| 4476.21      | 0.002747208 | 5630.04      | 0.008903652 | 5274.57      | 0.007980319 |
| 4503.06      | 0.002781942 | 5714.7       | 0.00935818  | 5348.892     | 0.008503498 |
| 4529.982     | 0.002855089 | 5846.766     | 0.009926784 | 5425.248     | 0.008728601 |
| 4584.894     | 0.002924457 | 5846.472     | 0.010572249 | 5464.302     | 0.00917754  |
| 4612.818     | 0.00296528  | 5984.706     | 0.010499504 | 5503.8       | 0.009572883 |
| 4612.866     | 0.00303663  | 6080.58      | 0.010440795 | 5544.006     | 0.010515361 |
| 4669.704     | 0.002921377 | 6229.908     | 0.011115362 | 5626.398     | 0.01136301  |
| 4787.982     | 0.002986463 | 6281.304     | 0.011201155 | 5797.944     | 0.012000614 |
| 4866.228     | 0.003090071 | 6333.882     | 0.011609246 | 5887.758     | 0.011983486 |
| 4944.474     | 0.003338971 | 6333.792     | 0.012619426 | 5933.766     | 0.012428334 |
| 4944.3       | 0.003417929 | 6552.324     | 0.011822355 | 6028.032     | 0.012583397 |
| 5043.396     | 0.003627373 | 6609.282     | 0.011797959 | 6027.9       | 0.012873814 |
| 5146.404     | 0.004034294 | 6667.212     | 0.011468504 | 6028.164     | 0.013109596 |
| 5181.582     | 0.004132484 | 6726.168     | 0.011410474 | 6076.158     | 0.013328493 |
| 5181.492     | 0.004417466 | 6786.18      | 0.011525136 | 6175.14      | 0.013168918 |
| 5327.706     | 0.004924093 | 6847.422     | 0.011848041 | 6225.696     | 0.015491917 |
| 5365.188     | 0.005293597 | 6847.656     | 0.01193577  | 6329.472     | 0.014991871 |
| 5521.812     | 0.006206678 | 6847.236     | 0.012593943 | 6436.662     | 0.01642185  |
| 5687.886     | 0.005741539 | 6973.062     | 0.012614281 | 6547.89      | 0.015537948 |
| 5819.682     | 0.006429415 | 7037.658     | 0.013728299 | 6662.4       | 0.015169256 |
| 5819.298     | 0.00610875  | 7170.294     | 0.014259326 | 6721.59      | 0.015789899 |
| 5864.448     | 0.005835404 | 7170.324     | 0.014515318 | 6781.728     | 0.015985647 |
| 5819.298     | 0.006392865 | 7170.294     | 0.014503606 | 6781.608     | 0.014730898 |
| 5864.976     | 0.006352565 | 7170.432     | 0.014588757 | 6842.814     | 0.015551165 |
| 5819.268     | 0.005926366 | 7238.7       | 0.014275257 | 6842.55      | 0.015654009 |
| 5864.622     | 0.00614279  | 7238.982     | 0.014239352 | 6842.412     | 0.015266317 |
| 5910.246     | 0.006352767 | 7170.432     | 0.014538508 | 6904.758     | 0.015820379 |
| 5910.564     | 0.006514419 | 7238.736     | 0.014234524 | 6904.68      | 0.015261992 |
| 5910.408     | 0.006624944 | 7170.444     | 0.014497092 | 6904.884     | 0.015968476 |

|          |             |           |             |          |             |
|----------|-------------|-----------|-------------|----------|-------------|
| 5956.728 | 0.006901972 | 7204.494  | 0.014356482 | 6904.998 | 0.016131503 |
| 6052.182 | 0.006940355 | 7238.544  | 0.014212074 | 7032.726 | 0.015916388 |
| 6051.936 | 0.007077793 | 7308.198  | 0.014102696 | 7098.576 | 0.016212394 |
| 6150.576 | 0.007106954 | 7308.324  | 0.014422679 | 7165.77  | 0.016125751 |
| 6151.134 | 0.007756154 | 7379.112  | 0.013826435 | 7165.242 | 0.016515788 |
| 6150.288 | 0.008340656 | 7451.586  | 0.013834221 | 7303.374 | 0.016250143 |
| 6201.024 | 0.007509352 | 7525.344  | 0.013784349 | 7374.198 | 0.016515943 |
| 6252.126 | 0.0106739   | 7600.596  | 0.013893195 | 7374.45  | 0.016614462 |
| 6411.048 | 0.010926269 | 7600.308  | 0.013966137 | 7446.402 | 0.015884856 |
| 6465.642 | 0.011844902 | 7755.708  | 0.013744632 | 7520.364 | 0.016356545 |
| 6521.496 | 0.01235733  | 7835.454  | 0.014057702 | 7595.436 | 0.016151558 |
| 6521.724 | 0.012763663 | 8085.924  | 0.013888081 | 7750.296 | 0.015843052 |
| 6521.76  | 0.012912351 | 8261.484  | 0.013502215 | 7750.056 | 0.016209948 |
| 6521.796 | 0.012805057 | 8352.15   | 0.013270191 | 7911.954 | 0.015691679 |
| 6521.61  | 0.012615273 | 8445.33   | 0.013103939 | 7911.582 | 0.015888951 |
| 6521.526 | 0.012309587 | 8445.114  | 0.01327077  | 7995.096 | 0.016187787 |
| 6521.568 | 0.012199864 | 8540.1    | 0.013017475 | 8080.458 | 0.015680052 |
| 6578.916 | 0.011912061 | 8492.463  | 0.013244675 | 8167.2   | 0.015918918 |
| 6521.538 | 0.012358361 | 8444.826  | 0.013413686 | 8167.152 | 0.015865955 |
| 6521.202 | 0.012456094 | 8540.172  | 0.013040865 | 8166.954 | 0.015653385 |
| 6578.514 | 0.012373388 | 8540.562  | 0.013021618 | 8255.934 | 0.015572626 |
| 6578.616 | 0.012466617 | 8540.316  | 0.013163317 | 8166.888 | 0.015862427 |
| 6578.286 | 0.012657453 | 8637.42   | 0.013027854 | 8256.024 | 0.015298131 |
| 6578.556 | 0.012738333 | 8637.366  | 0.013008327 | 8256.048 | 0.015306953 |
| 6578.502 | 0.012746729 | 8637.168  | 0.013230227 | 8255.982 | 0.015363666 |
| 6636.138 | 0.012404371 | 8736.678  | 0.012882125 | 8346.804 | 0.014986806 |
| 6695.25  | 0.012274425 | 8736.348  | 0.013014477 | 8255.55  | 0.015235244 |
| 6635.712 | 0.012907417 | 8838.396  | 0.012812268 | 8346.876 | 0.014956019 |
| 6635.736 | 0.013233952 | 8837.826  | 0.013013624 | 8346.732 | 0.015035032 |
| 6635.76  | 0.013416723 | 8941.986  | 0.013036482 | 8439.576 | 0.014878114 |
| 6635.598 | 0.01347488  | 9157.65   | 0.012710485 | 8534.364 | 0.014760821 |
| 6694.71  | 0.013285429 | 9157.176  | 0.012819297 | 8534.34  | 0.015008435 |
| 6754.704 | 0.011716341 | 9269.556  | 0.012587568 | 8533.734 | 0.015307496 |
| 6754.26  | 0.011867736 | 9269.79   | 0.012754296 | 8631.156 | 0.014973399 |
| 6753.972 | 0.014152383 | 9383.856  | 0.012466815 | 8630.634 | 0.015217929 |
| 6815.688 | 0.012613024 | 9383.622  | 0.012591663 | 8729.76  | 0.014991908 |
| 6784.929 | 0.011142466 | 9383.388  | 0.012796479 | 8935.962 | 0.014694865 |
| 6754.17  | 0.013978371 | 9621.828  | 0.012507073 | 8936.046 | 0.014821429 |
| 6877.578 | 0.012470552 | 9621.396  | 0.012608303 | 8935.776 | 0.014956145 |
| 6940.848 | 0.012630028 | 9621.21   | 0.012590734 | 9041.784 | 0.014814395 |
| 7005.108 | 0.011291003 | 9621.06   | 0.012587299 | 9151.056 | 0.014539514 |
| 7004.814 | 0.012833887 | 9621.246  | 0.012726315 | 9151.17  | 0.014510127 |
| 7004.598 | 0.012085348 | 9621.06   | 0.012813797 | 9151.026 | 0.014482162 |
| 7004.388 | 0.011273722 | 9744.75   | 0.012615899 | 9262.974 | 0.014499558 |
| 7004.682 | 0.012698134 | 9744.468  | 0.012787285 | 9377.55  | 0.014296569 |
| 7004.664 | 0.012381323 | 9744.528  | 0.012864465 | 9377.376 | 0.014639756 |
| 7070.07  | 0.011529235 | 9744.09   | 0.012968565 | 9377.226 | 0.014602209 |
| 7136.076 | 0.011356718 | 9871.02   | 0.012734373 | 9376.992 | 0.014582202 |
| 7136.976 | 0.011371741 | 9871.02   | 0.012828442 | 9494.244 | 0.01438493  |
| 7205.01  | 0.011220441 | 10001.268 | 0.01263167  | 9494.634 | 0.014579248 |
| 7205.028 | 0.011283782 | 10001.166 | 0.012664831 | 9615.444 | 0.014325842 |
| 7204.506 | 0.011435676 | 10001.268 | 0.012765326 | 9494.184 | 0.01471265  |
| 7344.588 | 0.010596164 | 10000.932 | 0.012902896 | 9614.646 | 0.014422444 |
| 7489.494 | 0.011100165 | 10134.828 | 0.012671695 | 9614.766 | 0.014474671 |
| 7642.26  | 0.010258496 | 10134.69  | 0.01271592  | 9614.49  | 0.014628901 |
| 7641.66  | 0.010432672 | 10134.348 | 0.012791236 | 9737.286 | 0.014686878 |

|          |             |           |             |           |             |
|----------|-------------|-----------|-------------|-----------|-------------|
| 7640.706 | 0.010878554 | 10134.384 | 0.012871518 | 9864.234  | 0.014480433 |
| 7718.61  | 0.010723805 | 10134.108 | 0.012916597 | 9993.672  | 0.014450024 |
| 7799.136 | 0.010507663 | 10133.832 | 0.012979927 | 10127.952 | 0.014145913 |
| 7798.464 | 0.010509474 | 10271.616 | 0.012790514 | 10127.508 | 0.01413679  |
| 7798.368 | 0.01054221  | 10412.544 | 0.012782462 | 9993.636  | 0.014502857 |
| 7881.69  | 0.010321307 | 10411.314 | 0.013027018 | 10127.916 | 0.014187495 |
| 7799.094 | 0.010588546 | 10706.832 | 0.012517063 | 10127.472 | 0.014241564 |
| 7881.942 | 0.010380972 | 10705.986 | 0.012572503 | 10127.508 | 0.014326386 |
| 7881.132 | 0.010555954 | 10556.244 | 0.012944901 | 10127.508 | 0.014344656 |
| 7880.448 | 0.010711917 | 10705.914 | 0.012612436 | 10127.508 | 0.014401439 |
| 7879.941 | 0.010657015 | 10706.064 | 0.012700891 | 10126.926 | 0.014452964 |
| 7879.434 | 0.010561319 | 10706.22  | 0.012632038 | 10127.298 | 0.014468692 |
| 7880.094 | 0.010473112 | 10556.394 | 0.01303724  | 10264.728 | 0.014067032 |
| 7879.23  | 0.010594495 | 10705.95  | 0.012802336 | 10264.584 | 0.014110683 |
| 7879.632 | 0.010717397 | 10705.644 | 0.01281191  | 10127.508 | 0.014469573 |
| 7880.034 | 0.010677974 | 10555.8   | 0.013195958 | 10264.866 | 0.014167583 |
| 7964.682 | 0.010441822 | 10705.8   | 0.012874275 | 10263.882 | 0.014468342 |
| 7963.242 | 0.01040647  | 10859.61  | 0.012543518 | 10549.824 | 0.014033654 |
| 8049.24  | 0.010852027 | 10705.38  | 0.012904895 | 10549.638 | 0.014023688 |
| 8135.106 | 0.010540736 | 10704.996 | 0.012902729 | 10549.374 | 0.014290591 |
| 8133.522 | 0.010989604 | 10858.59  | 0.01259484  | 10699.152 | 0.01391938  |
| 8314.326 | 0.010309517 | 10859.256 | 0.012566665 | 10698.084 | 0.014030568 |
| 8406.396 | 0.010122917 | 10858.392 | 0.012703965 | 10697.664 | 0.014153357 |
| 8404.68  | 0.010228847 | 10858.626 | 0.012799621 | 10697.742 | 0.014163332 |
| 8500.248 | 0.010115781 | 11016.696 | 0.012522577 | 10698.084 | 0.014175704 |
| 8498.802 | 0.010184424 | 11016.816 | 0.012576963 | 10697.82  | 0.014166664 |
| 8498.268 | 0.01019061  | 11016.372 | 0.012734458 | 10697.97  | 0.014196359 |
| 8498.268 | 0.01001671  | 11016.048 | 0.012952628 | 10697.97  | 0.014269371 |
| 8598.282 | 0.009801485 | 11177.808 | 0.012621386 | 10697.706 | 0.014288661 |
| 8597.022 | 0.010524491 | 11177.97  | 0.012743833 | 10697.898 | 0.01427089  |
| 8794.2   | 0.010467746 | 11178.138 | 0.012823692 | 10851.282 | 0.013906856 |
| 9007.818 | 0.010152535 | 11345.37  | 0.012537353 | 10851.324 | 0.014113179 |
| 9005.898 | 0.010241153 | 11345.76  | 0.012615961 | 10850.814 | 0.014323544 |
| 9117.042 | 0.0100862   | 11345.412 | 0.012625779 | 10850.418 | 0.014398574 |
| 9115.854 | 0.010055924 | 11177.472 | 0.01298736  | 10850.736 | 0.014383534 |
| 9116.022 | 0.010076872 | 11177.556 | 0.013005809 | 11008.608 | 0.014176203 |
| 9004.008 | 0.010317291 | 11345.628 | 0.012643001 | 11007.924 | 0.014243581 |
| 9116.13  | 0.010182675 | 11344.77  | 0.012675606 | 11007.924 | 0.014427045 |
| 9114.882 | 0.01036406  | 11345.37  | 0.012633352 | 11007.642 | 0.014396863 |
| 9114.138 | 0.010312714 | 11177.682 | 0.01302254  | 11170.566 | 0.014099689 |
| 9113.97  | 0.010248464 | 11344.86  | 0.012701377 | 11170.398 | 0.014030307 |
| 9113.862 | 0.010341993 | 11344.86  | 0.012747414 | 11170.104 | 0.014223428 |
| 9113.64  | 0.010502237 | 11176.806 | 0.013159981 | 11169.858 | 0.014306046 |
| 9228.33  | 0.010186921 | 11345.46  | 0.012806255 | 11169.024 | 0.014285444 |
| 9227.022 | 0.010098798 | 11345.286 | 0.01286606  | 11336.754 | 0.013859556 |
| 9227.814 | 0.010329594 | 11344.602 | 0.012863285 | 11337.354 | 0.013926248 |
| 9225.09  | 0.010319042 | 11344.428 | 0.012971101 | 11169.942 | 0.014344794 |
| 9223.728 | 0.010403634 | 11517.462 | 0.012706831 | 11337.354 | 0.01398101  |
| 9224.016 | 0.010457741 | 11517.198 | 0.012699774 | 11337.18  | 0.014020057 |
| 9223.02  | 0.010483219 | 11516.844 | 0.01272423  | 11336.796 | 0.014142364 |
| 9222.822 | 0.010558684 | 11517.156 | 0.012725067 | 11509.2   | 0.01376772  |
| 9339.072 | 0.010509391 | 11517.288 | 0.012737376 | 11509.866 | 0.013868579 |
| 9458.472 | 0.010131386 | 11516.622 | 0.01302674  | 11336.754 | 0.014366675 |
| 9458.946 | 0.010285462 | 11694.222 | 0.012750344 | 11508.894 | 0.013906859 |
| 9457.248 | 0.01036163  | 11785.446 | 0.012744776 | 11509.068 | 0.013955757 |
| 9336.516 | 0.010501779 | 11876.67  | 0.012597133 | 11509.422 | 0.013954134 |

|           |             |           |             |           |             |
|-----------|-------------|-----------|-------------|-----------|-------------|
| 9456.174  | 0.010293757 | 11877     | 0.012629101 | 11509.464 | 0.013941033 |
| 9457.488  | 0.010354301 | 11877     | 0.012676854 | 11509.332 | 0.01397958  |
| 9335.7    | 0.010692459 | 11877.016 | 0.01267466  | 11509.116 | 0.014004959 |
| 9454.836  | 0.010543659 | 11877.032 | 0.012671755 | 11509.2   | 0.014064015 |
| 9577.686  | 0.010382017 | 11877.048 | 0.012721985 | 11509.332 | 0.014010929 |
| 9574.662  | 0.010498508 | 11877.426 | 0.012755993 | 11508.894 | 0.014076991 |
| 9574.446  | 0.01055643  | 11877.234 | 0.012699326 | 11508.894 | 0.014112554 |
| 9700.578  | 0.010304683 | 11877.282 | 0.012723278 | 11509.464 | 0.014095482 |
| 9699.228  | 0.01031347  | 11876.718 | 0.012788389 | 11509.248 | 0.014314686 |
| 9699.324  | 0.010311114 | 11876.58  | 0.012835718 | 11686.068 | 0.013975631 |
| 9697.848  | 0.010435414 | 11876.766 | 0.012917893 | 11686.296 | 0.014103762 |
| 9697.062  | 0.010618058 | 11876.154 | 0.013062481 | 11685.792 | 0.01402599  |
| 9825.078  | 0.010257653 | 12065.298 | 0.012815121 | 11686.656 | 0.014158137 |
| 9822.408  | 0.010494178 | 12065.106 | 0.012905979 |           |             |
| 9822.408  | 0.010379228 | 12261.06  | 0.012511238 |           |             |
| 9956.688  | 0.010225293 | 12065.154 | 0.012974413 |           |             |
| 9956.16   | 0.010170687 | 12064.812 | 0.013022114 |           |             |
| 9954.576  | 0.010460628 | 12260.862 | 0.012583059 |           |             |
| 10088.478 | 0.010319625 | 12260.562 | 0.012604565 |           |             |
| 10086.342 | 0.010271734 | 12260.514 | 0.012653173 |           |             |
| 10086.846 | 0.010287135 | 12260.208 | 0.012812494 |           |             |
| 10084.812 | 0.010396349 | 12260.16  | 0.012965553 |           |             |
| 10084.95  | 0.010454313 | 12260.058 | 0.013116029 |           |             |
| 10084.812 | 0.010449124 | 12259.11  | 0.013069874 |           |             |
| 10226.898 | 0.010170484 | 12259.758 | 0.013295921 |           |             |
| 10084.506 | 0.01045823  | 12461.682 | 0.012839832 |           |             |
| 10226.55  | 0.010189577 | 12461.574 | 0.012863862 |           |             |
| 10224.324 | 0.010276368 |           |             |           |             |
| 10223.976 | 0.010352154 |           |             |           |             |
| 10222.824 | 0.010391317 |           |             |           |             |
| 10222.86  | 0.010408206 |           |             |           |             |
| 10222.65  | 0.010478421 |           |             |           |             |
| 10364.34  | 0.010390941 |           |             |           |             |
| 10362.48  | 0.010550764 |           |             |           |             |
| 10362.048 | 0.0106073   |           |             |           |             |
| 10507.182 | 0.010575922 |           |             |           |             |
| 10655.868 | 0.010314955 |           |             |           |             |
| 10655.226 | 0.010503537 |           |             |           |             |
| 10809.564 | 0.01043848  |           |             |           |             |
| 10806.84  | 0.010533936 |           |             |           |             |
| 10805.982 | 0.010591121 |           |             |           |             |
| 10806.564 | 0.010615128 |           |             |           |             |
| 10967.88  | 0.010361999 |           |             |           |             |
| 10967.076 | 0.010377415 |           |             |           |             |
| 10805.478 | 0.010666276 |           |             |           |             |
| 10968     | 0.010461966 |           |             |           |             |
