# Supplementary material for: Aerodynamic Performance of Propellers for Multirotor Unmanned Aerial Vehicles: Measurement, Analysis, and Experiment
Source: Hindawi journal article supplement (doi:10.1155/2021/9538647), 2021-01-01
Supplement: f1 [file 9538647.f1.zip]

| Speed(r/min) | Thrust(N) | Torque(N·m) | $P_0$ (W) | $V_i$ (m/s) | $\eta$ |
|--------------|-----------|-------------|-----------|-------------|--------|
| 1350.648     | -0.12056  | 0.01017     |           |             |        |
| 1708.158     | -0.09752  | 0.00846     |           |             |        |
| 2085.69      | -0.09311  | 0.00838     |           |             |        |
| 2267.352     | -0.09164  | 0.00791     |           |             |        |
| 2412.192     | -0.09213  | 0.00831     |           |             |        |
| 2533.632     | -0.05291  | 0.00741     |           |             |        |
| 2649.174     | -0.06223  | 0.00814     |           |             |        |
| 2715.906     | -0.05242  | 0.008       |           |             |        |
| 2765.64      | -0.0485   | 0.00786     |           |             |        |
| 2796.432     | -0.05046  | 0.00817     |           |             |        |
| 2827.812     | -0.0436   | 0.00842     |           |             |        |
| 2838.516     | -0.03722  | 0.00831     |           |             |        |
| 2881.764     | -0.02987  | 0.00828     |           |             |        |
| 2892.858     | -0.04703  | 0.0089      |           |             |        |
| 2892.87      | -0.03232  | 0.00838     |           |             |        |
| 2926.482     | -0.03085  | 0.00808     |           |             |        |
| 2915.256     | -0.01761  | 0.00833     |           |             |        |
| 2926.518     | -0.01516  | 0.00798     |           |             |        |
| 2915.238     | -0.02055  | 0.00796     |           |             |        |
| 2903.964     | -0.00536  | 0.00786     |           |             |        |
| 2909.58      | -0.01222  | 0.00879     |           |             |        |
| 2915.196     | -0.00487  | 0.00877     |           |             |        |
| 2960.952     | 0.0118    | 0.00886     |           |             |        |
| 2960.964     | -0.00683  | 0.00941     |           |             |        |
| 2996.148     | 0.01866   | 0.00937     |           |             |        |
| 3032.316     | 0.00641   | 0.00992     |           |             |        |
| 3076.152     | 0.00102   | 0.01001     |           |             |        |
| 3119.988     | 0.05102   | 0.01056     |           |             |        |
| 3185.838     | 0.08436   | 0.01064     |           |             |        |
| 3212.916     | 0.08926   | 0.01041     |           |             |        |
| 3240.564     | 0.07651   | 0.01059     |           |             |        |
| 3240.504     | 0.09269   | 0.01041     |           |             |        |
| 3254.49      | 0.09318   | 0.01011     |           |             |        |
| 3268.578     | 0.09465   | 0.01149     |           |             |        |
| 3297.234     | 0.08828   | 0.01181     |           |             |        |
| 3355.776     | 0.09367   | 0.01218     |           |             |        |
| 3416.58      | 0.09122   | 0.01377     |           |             |        |
| 3495.66      | 0.12112   | 0.01334     |           |             |        |
| 3561.606     | 0.1623    | 0.01327     |           |             |        |
| 3595.59      | 0.19417   | 0.01343     |           |             |        |
| 3630.144     | 0.2079    | 0.01377     |           |             |        |
| 3665.34      | 0.23045   | 0.01364     |           |             |        |
| 3701.412     | 0.23976   | 0.01483     |           |             |        |
| 3756.576     | 0.2579    | 0.0152      |           |             |        |
| 3832.926     | 0.30791   | 0.01613     |           |             |        |
| 3892.062     | 0.45106   | 0.01721     |           |             |        |
| 3995.166     | 0.61284   | 0.01862     |           |             |        |
| 4081.494     | 0.8609    | 0.02        |           |             |        |
| 4241.946     | 1.14916   | 0.02016     |           |             |        |
| 4339.518     | 1.2928    | 0.02102     |           |             |        |
| 4441.758     | 1.43105   | 0.02042     |           |             |        |

|          |         |         |  |  |  |
|----------|---------|---------|--|--|--|
| 4494.534 | 1.46585 | 0.02032 |  |  |  |
| 4521.24  | 1.4634  | 0.02153 |  |  |  |
| 4548.546 | 1.4938  | 0.02134 |  |  |  |
| 4604.208 | 1.54037 | 0.02203 |  |  |  |
| 4632.438 | 1.62763 | 0.02166 |  |  |  |
| 4660.962 | 1.69921 | 0.02222 |  |  |  |
| 4689.984 | 1.74921 | 0.02247 |  |  |  |
| 4719.294 | 1.7747  | 0.02118 |  |  |  |
| 4719.366 | 1.74872 | 0.02242 |  |  |  |
| 4719.234 | 1.76343 | 0.02372 |  |  |  |
| 4809.45  | 1.73745 | 0.02422 |  |  |  |
| 4840.35  | 1.78157 | 0.02407 |  |  |  |
| 4871.568 | 1.835   | 0.02554 |  |  |  |
| 4935.15  | 1.95609 | 0.02566 |  |  |  |
| 5034.066 | 2.00904 | 0.02466 |  |  |  |
| 5000.55  | 2.01884 | 0.02543 |  |  |  |
| 5034.072 | 2.03992 | 0.02612 |  |  |  |
| 5101.986 | 2.13111 | 0.0276  |  |  |  |
| 5171.94  | 2.27034 | 0.0278  |  |  |  |
| 5207.382 | 2.42819 | 0.02974 |  |  |  |
| 5317.662 | 2.68949 | 0.03066 |  |  |  |
| 5432.28  | 2.95226 | 0.03083 |  |  |  |
| 5471.526 | 3.37338 | 0.0312  |  |  |  |
| 5552.286 | 3.83763 | 0.03152 |  |  |  |
| 5593.194 | 4.02834 | 0.03006 |  |  |  |
| 5593.572 | 4.09403 | 0.03299 |  |  |  |
| 5634.996 | 4.60045 | 0.03563 |  |  |  |
| 5764.008 | 4.82008 | 0.03518 |  |  |  |
| 5853.522 | 5.1049  | 0.03632 |  |  |  |
| 5945.88  | 5.43435 | 0.03729 |  |  |  |
| 5992.488 | 5.60789 | 0.0368  |  |  |  |
| 6040.884 | 5.68339 | 0.0365  |  |  |  |
| 6040.788 | 5.70643 | 0.03715 |  |  |  |
| 6089.85  | 5.72849 | 0.03673 |  |  |  |
| 6040.518 | 5.69809 | 0.0368  |  |  |  |
| 6040.518 | 5.68976 | 0.03676 |  |  |  |
| 6089.922 | 5.67407 | 0.03657 |  |  |  |
| 6089.892 | 5.64956 | 0.03691 |  |  |  |
| 6089.862 | 5.68584 | 0.03685 |  |  |  |
| 6089.838 | 5.70839 | 0.03719 |  |  |  |
| 6089.502 | 5.83732 | 0.03758 |  |  |  |
| 6089.208 | 5.83536 | 0.03724 |  |  |  |
| 6139.566 | 5.89027 | 0.03825 |  |  |  |
| 6138.984 | 5.91135 | 0.03908 |  |  |  |
| 6241.278 | 6.20893 | 0.03957 |  |  |  |
| 6240.822 | 6.30501 | 0.03962 |  |  |  |
| 6240.222 | 6.17853 | 0.03961 |  |  |  |
| 6240.156 | 6.42806 | 0.03959 |  |  |  |
| 6292.752 | 6.17853 | 0.03976 |  |  |  |
| 6292.446 | 6.48346 | 0.03927 |  |  |  |
| 6239.886 | 6.23197 | 0.04146 |  |  |  |
| 6292.146 | 6.71485 | 0.04142 |  |  |  |

|          |          |         |  |  |  |
|----------|----------|---------|--|--|--|
| 6399.834 | 6.56043  | 0.04156 |  |  |  |
| 6454.722 | 6.66142  | 0.04125 |  |  |  |
| 6398.856 | 6.82957  | 0.04142 |  |  |  |
| 6398.922 | 6.71632  | 0.04128 |  |  |  |
| 6398.892 | 7.01831  | 0.04038 |  |  |  |
| 6398.622 | 7.32324  | 0.04186 |  |  |  |
| 6454.29  | 7.11587  | 0.04209 |  |  |  |
| 6453.276 | 6.90114  | 0.0431  |  |  |  |
| 6452.904 | 7.02076  | 0.04554 |  |  |  |
| 6623.19  | 7.16342  | 0.04548 |  |  |  |
| 6682.17  | 7.36638  | 0.04478 |  |  |  |
| 6681.204 | 7.5213   | 0.04548 |  |  |  |
| 6741.738 | 7.38795  | 0.04776 |  |  |  |
| 6866.028 | 7.64239  | 0.05011 |  |  |  |
| 6927.576 | 8.67287  | 0.04921 |  |  |  |
| 6991.686 | 8.71013  | 0.05007 |  |  |  |
| 6990.66  | 8.7317   | 0.05124 |  |  |  |
| 7057.746 | 9.05232  | 0.05002 |  |  |  |
| 6990.348 | 9.05183  | 0.05108 |  |  |  |
| 7057.08  | 8.99055  | 0.05064 |  |  |  |
| 7056.198 | 9.05085  | 0.05178 |  |  |  |
| 7055.85  | 9.2489   | 0.05152 |  |  |  |
| 7123.626 | 9.52736  | 0.05297 |  |  |  |
| 7191.246 | 9.81611  | 0.05424 |  |  |  |
| 7190.364 | 9.89259  | 0.05365 |  |  |  |
| 7260.738 | 10.01221 | 0.05429 |  |  |  |
